1     **Single-cell transcriptome analysis of CD34<sup>+</sup> stem cell-derived myeloid cells identifies a CFU-**  
2             **GEMM-like population permissive to human cytomegalovirus infection.**

3

4     Melissa Galinato<sup>1</sup>, Kristen Shimoda<sup>1</sup>, Alexis Aguiar<sup>1</sup>, Fiona Hennig<sup>2</sup>, Dario Boffelli<sup>2</sup>, Michael A  
5                             McVoy<sup>3</sup> and Laura Hertel<sup>1\*</sup>

6

7     <sup>1</sup>Center for Immunobiology and Vaccine Development, Children's Hospital Oakland Research  
8     Institute, Oakland, CA, USA

9     <sup>2</sup>Center for Genetics, Children's Hospital Oakland Research Institute, Oakland, CA, USA

10    <sup>3</sup>Virginia Commonwealth University, Richmond, VA, USA

11

12    \*Corresponding author's e-mail: lhertel@chori.org (LH)

13

14    Short title: single-cell analysis of CMV-infected myeloid cells

15 **ABSTRACT**

16 Myeloid cells are important sites of lytic and latent infection by human cytomegalovirus (CMV). We  
17 previously showed that only a small subset of myeloid cells differentiated from CD34<sup>+</sup> hematopoietic  
18 stem cells is permissive to CMV replication, underscoring the heterogeneous nature of these  
19 populations. The exact identity of susceptible and resistant cell types, and the cellular features  
20 characterizing permissive cells, however, could not be dissected using averaging transcriptional  
21 analysis tools such as microarrays and, hence, remained enigmatic. Here, we profile the transcriptomes  
22 of ~ 7000 individual cells at day one post-infection using the 10X genomics platform. We show that  
23 viral transcripts are detectable in the majority of the cells, suggesting that virion entry is unlikely to be  
24 the main target of cellular restriction mechanisms. We further show that viral replication occurs in a  
25 small but specific sub-group of cells transcriptionally related to, and likely derived from, a cluster of  
26 cells expressing markers of Colony Forming Unit – Granulocyte, Erythrocyte, Monocyte,  
27 Megakaryocyte (CFU-GEMM) oligopotent progenitors. Compared to the remainder of the population,  
28 CFU-GEMM cells are enriched in transcripts with functions in mitochondrial energy production, cell  
29 proliferation, RNA processing and protein synthesis, and express similar or higher levels of interferon-  
30 related genes. While expression levels of the former are maintained in infected cells, the latter are  
31 strongly down-regulated. We thus propose that the preferential infection of CFU-GEMM cells may be  
32 due to the presence of a pre-established pro-viral environment, requiring minimal optimization efforts  
33 from viral effectors, rather than to the absence of specific restriction factors. Together, these findings  
34 identify a potentially new population of myeloid cells susceptible to CMV replication, and provide a  
35 possible rationale for their preferential infection.

## 36 **AUTHOR SUMMARY**

37 Myeloid cells such as monocytes and dendritic cells are critical targets of CMV infection. To identify  
38 the cellular factors that confer susceptibility or resistance to infection, we profiled the transcriptomes of  
39 ~ 7,000 single cells from a population of semi-permissive myeloid cells infected with CMV. We found  
40 that viral RNAs are detectable in the majority of the cells, but that marked expression of CMV lytic  
41 genes occurs in only a small subset of cells transcriptionally related to a cluster of CFU-GEMM  
42 progenitors that express similar amounts of transcripts encoding interferon-related anti-viral factors as  
43 the rest of the population but higher levels of transcripts encoding proteins required for energy, RNA,  
44 and protein production. We thus conclude that the preferential infection of CFU-GEMM cells might be  
45 due to the pre-existing presence of an intracellular environment conducive to infection onset, rather  
46 than to the absence of anti-viral factors restricting viral entry or initial gene expression. Together, these  
47 findings uncover a new type of myeloid cells potentially permissive to CMV infection, expand our  
48 understanding of the cellular requirements for successful initiation of CMV infection, and provide new  
49 pro- and anti-viral gene candidates for future analyses and therapeutic interventions.

## 50 INTRODUCTION

51 Infection by human cytomegalovirus (CMV) is common and usually asymptomatic in healthy  
52 individuals, but can be the source of serious disease in hosts with naïve or compromised immune  
53 functions such as fetuses, newborns, AIDS patients, and solid organ or bone marrow transplant  
54 recipients [1, 2]. CD34<sup>+</sup> hematopoietic stem cells (HSC) and derived monocytes, macrophages and  
55 dendritic cells are important sites of CMV latency and reactivation, as well as of lytic infection *in vivo*  
56 (for recent reviews, see [3-6]). CMV interactions with these cells have thus been intensively studied,  
57 using a variety of different cell culture models [7-11].

58 We previously showed that exposure of cord blood CD34<sup>+</sup> HSC to specific cytokines such as Flt3  
59 ligand (FL) and transforming growth factor  $\beta$ 1, known to instruct their differentiation into Langerhans  
60 cells [12, 13], gives rise to myeloid cell populations that are semi-permissive to CMV infection. While  
61 only 2-3% of non-activated cells obtained at the end of the differentiation period allowed expression of  
62 the viral immediate early 1 and 2 (IE1/IE2) proteins, which are essential for infection onset and  
63 progression, cell activation by exposure to granulocyte-macrophage colony-stimulating factor (GM-  
64 CSF), fetal bovine serum (FBS), CD40 ligand (CD40L) and lipopolysaccharide (LPS) partially  
65 released this initial block, raising the proportion of IE1/IE2<sup>+</sup> cells by 5-10 fold [14-16]. Unexpectedly,  
66 however, non-activated cells produced higher yields per IE1/IE2<sup>+</sup> cell than activated cells, suggesting  
67 that signaling by GM-CSF, FBS, CD40L and LPS may trigger the establishment of a second block to  
68 infection progress, acting after IE gene expression and negatively impacting viral progeny production.  
69 This second block is unlikely to be due to defects in progeny release, as non-activated and activated  
70 cells generated similar ratios of cell-free to cell-associated virus [16], but may instead depend on  
71 impairments in the assembly of viral replication compartments (Galinato and Hertel, unpublished).

72 Because of their ability to restrict infection progress at multiple steps of the viral replication cycle,  
73 activated myeloid cells represent an outstanding model to study the determinants of cellular

74 susceptibility to CMV infection. Their intrinsic heterogeneity, however, thus far precluded the  
75 identification of cellular factors supporting or restricting infection using averaging gene expression  
76 analysis tools such as microarrays. Here, we took advantage of the most recent developments in single-  
77 cell RNA sequencing technologies to provide the first transcriptional profiling of CMV-infected,  
78 activated myeloid cells conducted at the single-cell level, and the first comparison of gene expression  
79 changes occurring in infected and bystander cells co-existing in the same population.

80 We show that: 1) more than half of the cells contain detectable viral transcripts at day one post-  
81 infection, with only a small minority (~ 2%) displaying an expression pattern consistent with  
82 progression to lytic replication. This indicates that restrictions to viral entry may contribute to, but are  
83 not the main determinant of resistance; 2) lytically-infected cells are transcriptionally related to a  
84 specific cluster of bystander cells with the hallmarks of CFU-GEMM, suggesting that this type of cells  
85 may be a previously unidentified target of CMV lytic infection; 3) compared to the remainder of the  
86 population, CFU-GEMM cells express similar or higher levels of IFN-related genes with anti-viral  
87 roles, which are strongly down-regulated in infected cells, indicating that CFU-GEMM cells are not  
88 defective in their ability to recognize and respond to CMV infection; 4) also compared to the remainder  
89 of the population, CFU-GEMM cells are enriched in transcripts encoding proteins involved in  
90 mitochondrial energy production, S-phase control, and RNA and protein production. Expression levels  
91 of these genes remain largely unchanged in lytically-infected cells, suggesting that that preferential  
92 infection of CFU-GEMM cells is likely due to the presence of a transcriptional landscape already  
93 optimized for viral replication, and requiring little conditioning effort from viral effectors, rather than  
94 to an intrinsic inability to recognize and respond to the presence of viral products.

95 Together, these data identify a new myeloid cell type potentially permissive to CMV replication,  
96 broaden our knowledge of the cellular determinants of susceptibility to infection, and reveal the  
97 identity of new pro- and anti-viral factors involved in regulating CMV tropism for myeloid cells.

## 98 RESULTS

### 99 CD34<sup>+</sup> HSC-derived myeloid cell populations are semi-permissive to CMV infection.

100 To identify cellular factors potentially involved in regulating the susceptibility of myeloid cells to  
101 CMV infection, we sought to analyze the transcriptome of permissive and non-permissive cell types  
102 derived from the differentiation of CD34<sup>+</sup> HSC *in vitro*. To select a representative population, the  
103 CD34<sup>+</sup> HSC isolated from the cord blood of twelve different donors were separately cultured in the  
104 presence of a cytokine cocktail known to promote the development of Langerhans-type dendritic cells  
105 [12, 13]. Differentiated cells were then activated by exposure to GM-CSF, FBS, CD40L and LPS, and  
106 infected with CMV strain TB40/E. Consistent with our previously published data [14-16], cell numbers  
107 did not increase over time (not shown), and only  $3 \pm 1.5$  % of non-activated but  $10 \pm 5$  % of activated  
108 cells expressed the viral IE1/IE2 proteins at day two post-infection (pi), notwithstanding the use of a  
109 multiplicity of infection (MOI) of ten pfu/cell, which is sufficient to infect the totality of permissive  
110 cell types such as fibroblasts (Fig 1A and B). Despite containing higher numbers of IE1/IE2<sup>+</sup> cells at  
111 each time point, activated cell populations produced lower intracellular progeny amounts per IE1/IE2<sup>+</sup>  
112 cell than non-activated cells (Fig 1C and D).

113 Activated cells differentiated from the CD34<sup>+</sup> HSC of donor 113G (Fig 1, pink circles) were then  
114 selected as representative, and subjected to single-cell RNA sequencing at day one using the 10X  
115 Genomics Chromium platform [17]. Activated cells were chosen to ensure data collection from  
116 sufficient numbers of infected cells, and to facilitate the identification of potential cellular inhibitors of  
117 viral replication, whereas the day one time point was selected to allow sufficient time for infection to  
118 start, while limiting the extent of virus-induced changes to the cellular transcriptional landscape. A  
119 median of 2,305 genes and 10,627 transcripts were detected in the 6,837 cells profiled, and the total  
120 number of genes with at least one count in any cell was 20,899. After reduction by principal  
121 components analysis, data was visualized in two dimensions using the *t*-distributed stochastic neighbor

122 embedding (*t*-SNE) algorithm [18], which displays cells with similar transcriptional profiles as nearby  
123 points, and cells with dissimilar transcriptional profiles as distant points with high probability (Fig 2A).  
124 Cells thus represented on *t*-SNE plots were then interrogated for specific gene transcripts using  
125 Loupe™ Cell Browser [19].

126

127 **Viral transcripts are detected in the majority of the cells, but their presence is not associated with**  
128 **expression of specific cellular genes.**

129 Query of the *t*-SNE projection data for the presence of viral RNA revealed that 59% of the cells in  
130 the population contained at least one viral transcript (Fig 2A and B). RNAs mapping to the viral open  
131 reading frames (ORFs) UL4/UL5, US34, UL145 and UL16/17, and to the non-coding RNA2.7 and  
132 RNA1.2, were present in the largest number of cells, accounting for half of the CMV-transcript<sup>+</sup>  
133 population. These viral RNA<sup>+</sup> cells were dispersed throughout the entire population, suggesting that  
134 infection had occurred into the majority of the cells. However, to avoid introducing perturbations  
135 potentially affecting cellular transcription, non-penetrated viral particles were not enzymatically  
136 removed from the cell surface. Consequently, some of the detected transcripts may have originated  
137 from virions still attached to the outside of cells or from penetrated capsids that did not reach the  
138 nucleus. The specific viral RNAs that were detected in the largest proportion of the cells, however, are  
139 not amongst those reported to be packaged into virions [20-22]. Moreover, more than half of the 26  
140 transcripts found in > 200 cells mapped to viral ORFs known to be expressed with immediate-early or  
141 early kinetics (not shown), suggesting that they were likely newly synthesized from the viral genome.

142 Staining of infected cells for the capsid-associated phosphoprotein pp150 [14, 23, 24] (Fig 2C) also  
143 revealed the presence of viral particles associated with 55 ± 15 % of activated cells and in 34 ± 9 % of  
144 non-activated cells at day one pi (Fig 2D). These results are consistent with our previously published  
145 data using CMV strain TB40-BAC4, a BAC-cloned variant of TB40/E [14], although, in contrast to

146 TB40-BAC4, TB40/E virions remained visible on, or within, the cells until at least day four pi.

147 To identify cellular factors potentially involved in restricting viral entry, the gene expression profile  
148 of CMV-transcript<sup>+</sup> cells was compared to that of CMV-transcript<sup>-</sup> cells. Only five cellular genes  
149 scored as differentially expressed between the two groups of cells with  $P < 0.05$ , but none was present  
150 in the totality, nor in the majority, of CMV-transcript<sup>-</sup> or CMV-transcript<sup>+</sup> cells (S1 Dataset). The two  
151 genes expressed in the largest number of cells, RETN and TJP1 (for gene names, see S2 Table 1), were  
152 detected in only 303 and 124 cells, respectively, and were distributed in both populations: RETN was  
153 found in 153 CMV-transcript<sup>+</sup> vs. 150 CMV-transcript<sup>-</sup> cells, and TJP1 in 104 CMV-transcript<sup>+</sup> vs 20  
154 CMV-transcript<sup>-</sup> cells.

155 The extent of expression of genes encoding potential CMV entry receptors, such as EGFR [25-28],  
156 PDGFRA [29-31], THY1/CD90 [32, 33], the integrins  $\alpha V\beta 3$ ,  $\alpha 2\beta 1$ , and  $\alpha 6\beta 1$  [34-36], and BSG [37]  
157 was also queried. EGFR, THY1/CD90, and integrins  $\beta 3$ ,  $\alpha 2$ , and  $\alpha 6$  were either not expressed at all or  
158 were found in less than ten cells, while PDGFRA was expressed in only 356 cells, and then only at low  
159 levels. Integrin  $\beta 1$  and BSG, by contrast, were present in larger numbers of cells (2568 and 5810,  
160 respectively), but these did not preferentially segregate with the CMV-transcript<sup>+</sup> group.

161 Together, these findings indicate that viral entry is unlikely to be the main roadblock restricting  
162 infection onset, that cells devoid of viral transcripts do not transcribe specific factor(s) restricting virion  
163 entry, and that cells containing viral RNAs do not selectively express genes encoding entry facilitators,  
164 including surface molecules reported to act as CMV entry receptors in other cell types.

165

166 **Transcription of viral lytic genes proceeds in a small group of cells lacking expression of select**  
167 **cellular genes.**

168 Eleven genetic loci were identified as required for efficient CMV genome replication in transient  
169 co-transfection replication assays [38, 39]. These encode the transcriptional activators/regulators IE1,



170 IE2, UL112/113, UL84 and IRS1/TRS1, the anti-apoptotic factors UL36-38, and six members of the  
171 viral DNA replication complex, i.e. the DNA polymerase UL54, the polymerase accessory factor  
172 UL44, the helicase UL105, the primase UL70, the primase associated factor UL102, and the single-  
173 stranded DNA binding protein UL57. To identify cells ostensibly progressing towards lytic replication,  
174 the population was queried for the presence of viral transcripts encoding each of these proteins.

175 A total of 278 cells, corresponding to ~ 4% of the entire population and ~ 7% of CMV-transcript<sup>+</sup>  
176 cells were UL122<sup>+</sup> (IE2) and/or UL123<sup>+</sup> (IE1), and 42% of these expressed both. These proportions  
177 were in agreement with those obtained by immunofluorescence staining of infected cells from donor  
178 113G harvested at day one pi (3.6% IE1/IE2<sup>+</sup>, data not shown).

179 Consistent with progression towards lytic replication (Fig 1D), UL122<sup>+</sup>/UL123<sup>+</sup> cells were also  
180 found to express transcripts encoding UL112/113 (91% triple-positive), UL84 (77%), IRS1/TRS1  
181 (59%), UL36 (84%), UL37 (13%), UL38 (83%), and three replication complex components, namely  
182 UL54 (64%), UL105 (70%), and UL102 (56%) (Fig 3A). By contrast, RNAs corresponding to UL44,  
183 UL70, and UL57 were not detected. Staining of infected cells confirmed that the UL84 protein was  
184 present in  $37 \pm 19\%$  of activated, IE1/IE2<sup>+</sup> cells at day two pi (Fig 3B and E). Interestingly, while the  
185 UL44 and UL57 proteins were also observed at day two pi (Fig 3C and D), the proportion of IE1/IE2<sup>+</sup>  
186 cells co-expressing each of these polypeptides in activated cells was significantly lower than in non-  
187 activated cells (Fig 3E). This suggests that assembly of the viral DNA replication complex in activated  
188 cells might be impaired, perhaps on account of delayed or inefficient transcription of specific complex  
189 members.

190 The data from cells containing the above viral transcripts, plus several others, comprised a tight and  
191 well separated cluster of 138 points on the *t*-SNE projection, which we collectively named CMV<sup>+</sup> (Fig  
192 3A). Comparison of the transcriptional profile of CMV<sup>+</sup> and CMV<sup>-</sup> cells identified 629 genes as being  
193 more highly expressed in CMV<sup>-</sup> cells, but none was associated with significant P values (< 0.05), nor

194 was present in the totality of CMV<sup>-</sup> and absent in CMV<sup>+</sup> cells. Sixty cellular genes had more than four-  
195 fold higher mean expression levels in CMV<sup>-</sup> than in CMV<sup>+</sup> cells, with nine being present in more than  
196 50% of CMV<sup>-</sup> cells but less than 50% of CMV<sup>+</sup> cells (S3 Dataset and S4 Fig). Encouragingly, and as  
197 expected for virus-exposed cells, five of these nine genes encoded well-known type I interferon (IFN)-  
198 inducible proteins involved in mediating innate immune responses to viruses, i.e. MX1, OAS1, OAS2,  
199 IFIT3, and USP18. In line with activated myeloid cells, the majority of CMV<sup>-</sup> cells also expressed the  
200 TNF- $\alpha$  and LPS-inducible protein CYTIP [40], and the CD40 ligand-inducible costimulatory molecule  
201 CD80 [41], plus two genes, one coding for the orphan G protein-coupled receptor GPR157 and one for  
202 DUSP4, whose transcriptional regulation by viruses or other stimuli has not been assessed.

203 Together, these data indicate that although CMV transcripts are associated with the majority of  
204 cells, lytic infection proceeds in only a small sub-population containing lower amounts of a handful of  
205 genes, most of which encode known powerful antiviral proteins.

206

### 207 **CMV<sup>+</sup> cells are closely related to a specific sub-cluster of cells within the population.**

208 The direct comparison of CMV<sup>+</sup> and CMV<sup>-</sup> cells failed to yield transcripts with statistically  
209 significant differences in expression levels between the two groups, suggesting that resistance to  
210 infection is unlikely to be conferred by a single set of “universal” restriction factors highly expressed in  
211 all CMV<sup>-</sup> cells but absent in CMV<sup>+</sup> cells. Rather, we hypothesized that the CMV<sup>-</sup> population might be  
212 comprised of several different cell types, each resisting infection due to the expression of anti-viral  
213 genes, or to the lack of pro-viral factors, specific to each sub-group.

214 Cell clustering using the K-means algorithm indeed revealed the presence of multiple different sub-  
215 groups of cells within the population, each characterized by distinct transcriptional profiles (Fig 4A).

216 To identify the cluster most closely related to CMV<sup>+</sup> cells, the mean number of transcripts/cell for each

217 gene in the CMV<sup>+</sup> cluster was divided by the mean number of transcripts/cell for each gene in each of  
218 the other nine clusters, and the frequency distribution of all Log<sub>2</sub> ratios was plotted. A nonlinear  
219 regression fit test using the least squares method revealed that all distributions could be described by  
220 the Gaussian function, and that the histogram with the mean value closest to zero (0.184), the smallest  
221 standard deviation (0.814), and the highest R<sup>2</sup> value (0.995) belonged to the CMV<sup>+</sup> versus cluster 6  
222 comparison (Fig 4B). A Wilcoxon signed rank test also identified the Log<sub>2</sub> CMV<sup>+</sup>/cluster 6 ratio  
223 distribution as the one whose median values differed the least from zero, suggesting that the  
224 transcriptional profiles of CMV<sup>+</sup> and cluster 6 cells were the most similar to each other.

225 To uncover the identity of cluster 6 cells, the genes most selectively expressed by this cluster  
226 relative to the rest of the population were identified using the 10X Genomics Cell Ranger software  
227 [42], and their expression range *in vivo* was assessed using publicly available gene expression  
228 databases and literature data. Sixty-nine genes were selected as being highly differentially expressed  
229 (Log<sub>2</sub> cluster 6/rest of the cells fold change > 4, P values < 10<sup>-15</sup>, S5 Dataset). Seven of these (ELANE,  
230 PRTN3, AZU1, MPO, PRSS57, CTSG and RNASE2), coding for markers of neutrophil precursors  
231 [43, 44] were predominantly or exclusively expressed in a sub-group of 116 cells, which we designated  
232 “promyelocytes” (S6 Fig A). Four more genes (RETN, S100A8, S100A9 and S100A12), encoding  
233 proteins secreted by activated neutrophils under pro-inflammatory conditions [45, 46], were abundant  
234 in promyelocytes and in a separate group of ~ 205 cells, designated “activated neutrophils” (S6 Fig B).  
235 The remaining 57 genes encoded mostly DNA replication and cell cycle regulators, and were present,  
236 either exclusively or overlapping with promyelocytes and CMV<sup>+</sup> cells, in a third sub-group of 93 cells  
237 (S6 Fig C), designated “sub-cluster 3”.

238 In addition to separating cluster 6 into three sub-clusters, other groups of cells were identified based  
239 on their expression of known markers such as CD14 and CD68 (monocytes), CD207/langerin and  
240 CD1a (Langerhans cells), CD1b (monocyte-derived dendritic cells), and hemoglobins (erythrocytes)

241 (Fig 4C). Of note, and in keeping with CD34<sup>+</sup> HSC differentiation towards myeloid (rather than  
242 lymphoid) lineages, no T or B cell specific transcripts were found.

243 While none of the promyelocyte- and activated neutrophil-specific genes were also expressed by  
244 CMV<sup>+</sup> cells, 18 (32%) of sub-cluster 3 marker genes were shared, some almost exclusively, with the  
245 CMV<sup>+</sup> group. This suggested that sub-cluster 3 cells in specific might be related to the CMV<sup>+</sup> cell  
246 cluster. To further verify this, the mean number of transcripts/cell for each gene in the CMV<sup>+</sup> cluster  
247 was divided by the mean number of transcripts/cell for each gene in each of the other 13 clusters, and  
248 the frequency distribution of Log<sub>2</sub> ratios was plotted. The histogram whose median value differed the  
249 least from zero did indeed correspond to the CMV<sup>+</sup> versus sub-cluster 3 comparison (Fig 4D),  
250 confirming that the transcriptional profile of these two groups are the most closely related.

251

### 252 **Sub-cluster 3 is comprised of cells with CFU-GEMM hallmarks.**

253 To more precisely identify the cell type comprising sub-cluster 3, the list of 115 genes more  
254 abundantly (average transcript count > 0.3) and most differentially (Log<sub>2</sub> fold change > 3, P < 0.0005)  
255 transcribed in these cells relative to all other clusters was compared to gene lists from two recently  
256 published single-cell analyses of human hematopoiesis [47, 48] (S7 Dataset). Seventy-two transcripts  
257 were found among the list of genes reported to be differentially expressed in 16 discrete bone marrow  
258 populations by Velten L. et al. [48], with the largest proportion falling within the “G2/M phase” (56%)  
259 and the “Immature myeloid progenitors with high cell cycle activity” (24%) categories. A total of 108  
260 genes were also found among the transcripts classified as differentially expressed in seven human cord  
261 blood populations by Karamitros D. et al. [47], with the vast majority belonging to the “common  
262 myeloid progenitor” population (88%), followed by the megakaryocyte/erythroid progenitor  
263 compartment (6%). This suggested that sub-cluster 3 cells might consist of multipotent progenitors  
264 which, in contrast to HSC, are known to be highly proliferative and metabolically active [49, 50].

265 Within our population, half of the 115 abundantly/differentially expressed genes were almost  
266 exclusively associated with sub-cluster 3, followed by shared expression with promyelocytes,  
267 erythrocytes/megakaryocytes, activated neutrophils, and monocytes (S7 Dataset). Thirty-six of these  
268 genes were also present in CMV<sup>+</sup> cells, with the majority being shared with the promyelocytes and  
269 erythrocytes/megakaryocytes clusters. Together, these data indicate that sub-cluster 3 is comprised of  
270 proliferating cells expressing erythroid, monocytic and granulocytic markers, which we surmised might  
271 represent CFU-GEMM oligopotent progenitors.

272 To further test this hypothesis, cells belonging to the cluster 7, erythro, mono, MDDC, CMV<sup>+</sup>,  
273 promyelo, act neut and sub-cluster 3 groups depicted in Fig 4C were ordered along trajectories  
274 corresponding to their inferred differentiation pathways using Monocle [51]. A trajectory with four  
275 main branches extending from a rooted center was generated (Fig 5A), and the identity of cells  
276 composing each of the eight groups was uncovered using Seurat [52] (Fig 5B and S8 Fig). Cells in  
277 group D, the root center, expressed the same key genes as sub-cluster 3 cells in Fig 4C, while its closest  
278 neighbors, group E, F, G and H, expressed markers typical of the monocytes, erythrocytes,  
279 promyelocytes and activated neutrophils clusters in Fig 4C, respectively (S8 Fig and S9 Dataset). The  
280 most isolated cluster of cells, group B, was related to CL7 in Fig 4C, and differentially expressed CD52  
281 and FCER1A (S9 Dataset). Thus, the observed pseudotime distances and cluster organization strongly  
282 implicated group D as the most likely origin of erythrocytes, megakaryocytes, promyelocytes,  
283 neutrophils and monocytes, suggesting that cells comprising group D/sub-cluster 3 might indeed  
284 represent CFU-GEMM. As the CMV<sup>+</sup> cluster was immediately adjacent to group D, we further  
285 conclude that CMV<sup>+</sup> cells are directly related to, and possibly derived from, CFU-GEMM progenitors.

286

287 **The majority of the genes characterizing CFU-GEMM cells are more highly expressed in this**  
288 **cluster than in the rest of the population, and are maintained to similar levels in CMV<sup>+</sup> cells.**

289 To understand why cells in sub-cluster 3 (reabeled GEMM) in particular allowed infection to  
290 initiate we sought to identify which set of genes and, consequently, which cellular functions, were most  
291 differentially regulated in GEMM and CMV<sup>+</sup> cells with respect to the rest of the population. A set of  
292 1989 genes was identified by the 10X Genomics Cell Ranger software as being more selectively  
293 expressed in the CMV<sup>+</sup> and GEMM clusters relative to all other clusters. The majority of these genes  
294 (1361, or 68% for GEMM, and 1460, or 73% for CMV<sup>+</sup> cells) were associated with positive Log<sub>2</sub> fold  
295 change values, indicating that most of the GEMM-specific genes were more highly expressed in these  
296 cells than elsewhere, and that, as expected, infection was accompanied by a strong transcriptional up-  
297 regulation of cellular genes (S10 Dataset, sheet 1).

298 The differentially expressed genes were then partitioned between “synchronous” and  
299 “asynchronous”, depending on whether their transcription was similarly regulated in GEMM and  
300 CMV<sup>+</sup> cells or not. Genes that were up-regulated in GEMM cells relative to the rest of the population,  
301 and that were expressed to similar levels or further up-regulated in CMV<sup>+</sup> cells (total = 1077), as well  
302 as genes that were down-regulated in GEMM cells and that were expressed to similar levels or further  
303 down-regulated in CMV<sup>+</sup> cells (total = 325) were considered synchronous, while genes that were up-  
304 regulated in GEMM but down-regulated at least two-fold in CMV<sup>+</sup> cells, and vice-versa, were labeled  
305 asynchronous (total = 587). The majority (1402, 70 %) of the selected genes fell into the synchronous  
306 category. Of these, most were up-regulated in the GEMM cluster and expressed to similar levels in  
307 CMV<sup>+</sup> cells, with only 28 genes being further induced in infected cells, suggesting that GEMM cells  
308 already contain large numbers of transcripts beneficial (or neutral) to infection (S10 Dataset, sheet 1).  
309 As levels of down-regulated genes were also mostly maintained without any further repression by  
310 infection, we hypothesized that GEMM cells might be preferentially infected because their  
311 transcriptional landscape requires the least amount of optimization by viral effectors.

312

313 **Expression of genes with functions in energy production, cell cycle control, RNA and protein**  
314 **metabolism is higher in both GEMM and CMV<sup>+</sup> cells.**

315 To pinpoint the functional areas distinguishing GEMM cells from the remainder of the population,  
316 the most differentially expressed synchronous genes, and all of the asynchronous genes (1304 in total)  
317 were partitioned into 15 categories based on their encoded functions (S10 Dataset, sheet 2). The  
318 transcript abundance of each gene found in the CMV<sup>+</sup> or GEMM clusters was then divided by the  
319 abundance in the rest of the cells (CMV/REST and GEMM/REST) or in GEMM cells (CMV/GEMM),  
320 and the distributions of the Log<sub>2</sub> ratio values were plotted (Fig 6). As expected, only the GEMM/REST  
321 and CMV/REST, but not the CMV/GEMM ratio distributions of all genes were identified by the  
322 Wilcoxon signed rank test as having Log<sub>2</sub> median values significantly different from zero (Fig 6A).  
323 Genes with roles in mitochondrial functions (Fig 6I), proliferation and cell cycle control (Fig 6J), RNA  
324 metabolism (Fig 6L) and protein processing (Fig 6K) were also more highly expressed in both GEMM  
325 and CMV<sup>+</sup> cells, and were thus further scrutinized.

326  
327 *Mitochondria.* Genes involved in ATP production, mitochondrial protein synthesis, and  
328 mitochondrial transport were consistently more abundant in GEMM cells than elsewhere (Fig 7A and  
329 C-E, blue lines), with their expression levels remaining largely unchanged in CMV<sup>+</sup> cells (Fig 7A, and  
330 C-E, red lines). Among these, genes encoding members of the ATP synthase and NADH  
331 dehydrogenase complexes of the electron transfer chain were the most represented, together with genes  
332 encoding mitochondrial ribosomal proteins (S10 Dataset, sheet 3). This suggests that infection might  
333 preferentially start in GEMM cells due to the existence of an intracellular environment already geared  
334 toward high energy production, and hence capable of supporting the large metabolic requirements of  
335 viral replication. We did indeed previously observe a similarly strong up-regulation of genes with  
336 functions in oxidative phosphorylation and fatty acid  $\beta$ -oxidation in infected fibroblasts at late times pi

337 [53], indicating that the enhancement of mitochondrial functions is a key feature of infection.

338

339 *Proliferation/cell cycle.* Consistent with the notion that multipotent progenitors are highly  
340 proliferative [49, 50], GEMM cells expressed higher levels of genes encoding S and M phase effectors  
341 than the rest of the population (Fig 7B and F-G, blue lines and S10 Dataset, sheet 4). CMV infection of  
342 fibroblasts was reported by us and others to repress expression of genes promoting entry into S phase,  
343 while simultaneously inducing expression of DNA synthesis effectors [53-56]. In keeping with these  
344 observations, CMV<sup>+</sup> cells contained lower transcript amounts of genes promoting entry into S phase,  
345 such as CCNA2, CCND3, MKI67 and RB1, but higher transcript levels of genes encoding inhibitors of  
346 S phase progression, including BTG1, BTG3, CCNDBP1, CDKN1A (Cip1) and the HSC quiescence-  
347 promoting gene NDN [57], which was almost exclusively expressed in CMV<sup>+</sup> cells (not shown).  
348 Transcription of DNA replication effectors was, by contrast, inconsistently induced. While expression  
349 of some genes, such as the catalytic subunit of the DNA polymerase delta (POLD2) and its interacting  
350 protein POLDIP2, RPA3 and the RPA complex nuclear importer RPAIN, was high, transcription of  
351 others such as PCNA, MCM3, MCM7, and FEN1 was reduced in CMV<sup>+</sup> cells. We speculate that this  
352 mixed transcriptional regulation might be typical of the early phase of infection, when viral factors are  
353 still in the process of gaining control over cell proliferation, while at later times, when data from  
354 fibroblasts were collected [53], viral DNA synthesis is already fully established.

355 We previously reported that CMV infection induces the appearance of aberrant mitotic figures,  
356 supported by the induction of numerous genes involved in M phase progression [53]. Although this  
357 feature was shared by different CMV strains, it was by far most evident with the attenuated strain  
358 AD169 than with TB40/E [58]. Consistent with the TB40/E pattern, only a minority of the 63 genes  
359 with functions in mitosis were maintained to high levels in CMV<sup>+</sup> cells, while the rest were down-  
360 regulated (Fig 7B and G), including the two main components of the mitosis-promoting factor, CDK1



361 and CCNB1, chromatin condensation agents (SMC2, SMC4, ZWINT and TOP2A), mitotic spindle  
362 assembly controllers (AURKB, BIRC5, PLK1, MAD2L1, and CENPF), components of the anaphase-  
363 promoting complex (CDC20 and PTTG1), and cytokinesis effectors (SEPT9, ARF6, and RAB11A).

364 Together, these data are consistent with a CMV-induced block in cell proliferation, aimed at  
365 curtailing usage of cellular resources for processes irrelevant to viral replication, such as mitosis, and  
366 steering others, such as those devoted to cellular genome replication, toward viral DNA production  
367 instead.

368

369 *RNA metabolism.* As expected for metabolically active cells, expression of numerous genes  
370 involved in RNA processing, splicing and translation were more highly expressed in GEMM and in  
371 CMV<sup>+</sup> cells than in the rest of the population (Fig 8A, C and D, blue and green lines and S10 Dataset,  
372 sheet 5). By contrast, expression of ~ 70% of transcription-related genes was similar in GEMM and in  
373 the rest of the cells, but was up-regulated in CMV<sup>+</sup> cells (Fig 8A and B, blue and red lines).

374 Particularly revealing of the strong impetus of infection toward stimulating cellular gene  
375 transcription on a broad scale was the induction of several RNA polymerase II subunits and elongation  
376 factors (Fig 8E), while among transcription factors, the most strongly up-regulated in CMV<sup>+</sup> cells were  
377 the HOPX homeobox (CMV/GEMM ratio ~14-fold), the proto-oncogene JUN (7-fold) with its  
378 heterodimerization partner BATF3 (3-fold), and the differentiation inhibitor ID2 (3-fold). Transcription  
379 of the other two JUN partners, FOS and JUNB, and of the regulators of hematopoietic cells  
380 differentiation IKZF1, SPI1/PU.1, and RUNX3 was instead reduced 2- to 9-fold (Fig 8F).

381 Thus, the early stages of infection appear to be associated with a sharp push towards increased  
382 production of RNA synthesis and processing effectors. This is likely required to support viral gene  
383 transcription in order to fine-tune viral control over a variety of cellular processes, including cell  
384 differentiation.

385

386 *Protein metabolism.* In keeping with the robust infection-associated stimulation of gene translation,  
387 expression of numerous protein chaperones and post-translational modifiers was also higher in both  
388 GEMM and CMV<sup>+</sup> cells than in the rest of the population (Fig 9A and B-C, blue and green lines and  
389 S10 Dataset, sheet 6). Chaperone-assisted protein folding occurs via three main routes, the simplest one  
390 being via interactions with single HSP70 or HSP90 family members. Some polypeptides require the  
391 sequential binding of HSP70 and HSP90 instead, while others need the intervention of the chaperonin  
392 containing TCP1 complex (CCT) [59]. Both HSP70 coding transcripts, HSPA1A and HSPA1B, and  
393 their co-chaperone DNAJB6 were expressed to lower levels in GEMM cells than in the rest of the  
394 population, and were up-regulated in infected cells. The adaptor protein STIP1, which coordinates  
395 protein transfer from HSP70 to HSP90, the inducible (HSP90AA1) and constitutive (HSP90AB1)  
396 HSP90 isoforms, and all eight subunits of the CCT complex were expressed at higher levels in both  
397 GEMM and CMV<sup>+</sup> cells. A similar pattern of regulation was observed for calnexin (CANX) and  
398 calreticulin (CALR), and for seven out of eleven members of the large endoplasmic reticulum (ER)-  
399 localized multiprotein complex (HSPA5, DNAJB11, HSP90B1, PPIB, PDIA6, SDF2L1 and ERP29),  
400 which, together, comprise the ER protein quality control system [60, 61] (Fig 9E).

401 Levels of numerous genes with roles in protein degradation were also slightly higher in GEMM and  
402 CMV<sup>+</sup> cells (Fig 9A and D, blue and green lines). Of particular interest was the up-regulation of 17  
403 subunits (out of 33) of the proteasome (Fig 9F). Protein degradation may benefit the virus by removing  
404 unwanted cellular polypeptides and damaged or misfolded proteins, while simultaneously enhancing  
405 amino acid availability. An essential role of the proteasome, however, is to produce antigenic peptides  
406 suitable for presentation on major histocompatibility complex (MHC) class I molecules, an activity  
407 extremely detrimental to virus spread. In the immunoproteasome, the proteolytic subunits PSMB5, 6  
408 and 7 are replaced with PSMB8, 9 and 10. Very intriguingly, and consistent with data from infected

409 fibroblasts [62], expression of these latter subunits was down-regulated in CMV<sup>+</sup> cells (Fig 9F).

410 In addition to curtailing the ability of the immunoproteasome to produce antigenic peptides, MHC  
411 class I activities were also negatively impacted by the strong transcriptional induction of APLP2, an  
412 enhancer of MHC class I internalization and turnover [63, 64]. Rather intriguingly, transcript levels of  
413 genes encoding the three main MHC class I molecules, HLA-A, -B, and -C, and of their binding  
414 partner B2M, as well as of the three main MHC class II isotypes, HLA-DR, -DQ, and -DP and the  
415 invariant chain CD74 were already ~ 2.5-fold lower in GEMM cells than in the rest of the population  
416 and were not further reduced in CMV<sup>+</sup> cells (Fig 9G). By contrast, expression of HLA-DMA and  
417 HLA-DMB, which assist in the binding of high affinity antigenic peptides into MHC class II [65], were  
418 repressed while transcription of HLA-DOA and HLA-DOB, which increase tolerance to self-peptides  
419 [65], was increased (Fig 9G). Together, these data underscore the strong effects of infection on fine-  
420 tuning the cellular protein “portfolio” to match the virus’ needs, and highlight the pristine selectivity of  
421 viral effectors in modulating the expression of specific cellular proteins in order to protect infected  
422 cells from detection and elimination by the host immune system.

423

424 **Expression of genes with functions in IFN-mediated antiviral defenses is similar in GEMM and**  
425 **in the rest of the cells, and is strongly down-regulated in CMV<sup>+</sup> cells.**

426 Akin to genes belonging to categories of apoptosis, immune, lipids, soluble  
427 factors/receptors/signaling and vesicles (Fig 6C, G, H, M and N, blue line), transcript levels of IFN-  
428 related genes were overall similar in GEMM cells and in the rest of the population (Fig 6F, blue line).  
429 Very excitingly, however, this category contained the most strongly down-regulated genes of all in  
430 CMV<sup>+</sup> cells (median Log<sub>2</sub> CMV/GEMM ratio value of - 1.9, P < 0.0001, Fig 6F, red line).

431 Compared to the rest of the population, GEMM cells contained higher levels (median ratio, ~ 1.5-  
432 fold) of transcripts encoding sensors of viral double-stranded DNA and RNA, such as IFI16 [66],

433 HMGB1 [67], DDX58/RIG-I [68], IFIH1/MDA5 [69] and EIF2AK2/PKR [70], of signaling mediators  
434 like STAT1, and of transcriptional activators such as IRF3, IRF7 and IRF8 [71], but lower levels  
435 (median ratio, ~ 4-fold) of negative regulators of IFN production and signaling such as IRF2 [72],  
436 IRF4 [73], TRAFD1 [74] and SOCS1 [75]. Expression of IFN effectors including IFIT1, IFIT2 and  
437 IFIT3, which recognize and prevent translation of virally produced triphosphorylated RNA molecules  
438 [76], IFITM1, IFITM2 and IFITM3, which block infection at multiple steps including entry [77],  
439 ISG15 and its conjugating (HERC5) and de-conjugating (USP18) enzymes, which disrupt the activity  
440 of viral proteins by ISGylation [78], as well as of known (MX1, MX2, OAS1, OAS2, OAS3 and  
441 OASL) [79, 80], or suspected anti-viral proteins such as viperin [81], SAMHD1 [82] and ISG20 [83]  
442 were instead similarly abundant in GEMM and the rest of the cells (median ratio, ~ 1.1-fold) (Fig 10,  
443 GEMM/REST column).

444 Together, these data suggest that GEMM cells are not defective in their ability to detect, respond  
445 and potentially antagonize viral infection. Rather, GEMM cells appear to be similarly, or even more  
446 responsive than the rest of the population, indicating that the lack of appropriate cellular defenses is  
447 unlikely to be the main reason for their preferential infection. Interestingly, and similar to the situation  
448 with MHC class I and II genes, transcriptional modulation of these genes in CMV<sup>+</sup> cells appeared to be  
449 selective: while mRNA levels of most IFN antiviral effectors were powerfully reduced, transcription of  
450 negative regulators was enhanced, with the notable exception of the adaptor protein TMEM173/STING  
451 [84-87] and the TBK1 activator OPTN [88], which are both involved in IFN production following  
452 CMV DNA detection by MB21D1/cGAS [89]. Taken together, these findings provide support to our  
453 theory whereby infection preferentially begins in GEMM cells due to their higher metabolic,  
454 proliferative, and RNA and protein synthesis rates, rather than to impairments in their capacity to  
455 mount strong cellular defenses.

## 456 **DISCUSSION**

457 In previous studies, we showed that activated and non-activated myeloid cells differentiated from  
458 CD34<sup>+</sup> HSC are semi-permissive to CMV infection [9, 14-16]. As such, they constitute a useful model  
459 to identify the cellular determinants of viral tropism.

460 Based on our current and previous data, resistance to infection appears to be multilayered, affecting  
461 multiple sequential steps in the viral life cycle, and progressively narrowing the proportion of cells  
462 capable of supporting the full viral replication cycle. While in homogeneous permissive cell  
463 populations such as fibroblasts the probability for a cell to remain free of viral particles at an MOI of  
464 ten is null, our data show that at day one pi ~ 40% of activated myeloid cells do not contain any viral  
465 RNAs (Fig 2). However, of the CMV-transcript<sup>+</sup> cells, only ~ 7% express the UL122 and UL123 ORFs  
466 necessary for infection onset, and of these, about half contain additional transcripts needed for CMV  
467 genome replication. While the proportion of cells progressing toward the replicative stage may increase  
468 over time, the number of IE1/IE2<sup>+</sup> cells remained unchanged from day two pi onwards (Fig 1),  
469 suggesting that the cellular barriers restricting infection onset are never overcome. Despite the presence  
470 of donor-dependent variation (expected not only for primary cells but especially for hematopoietic cell  
471 types), activated cells consistently contained larger proportions of IE1/IE2<sup>+</sup> cells but produced less  
472 progeny (Fig 1). We used these less permissive cells as a tool to identify the cellular pathways involved  
473 in inhibiting (or promoting) infection.

474 Although the absence of viral RNAs in ~ 40% of activated cells may depend, at least in part, on  
475 timing and detection limits, it is also possible for this portion of the population to be more resistant to  
476 viral entry due to the presence of specific restriction factors and/or the absence of entry facilitators.  
477 However, no specific cellular genes were identified as being selectively transcribed in viral RNA<sup>+</sup> or  
478 RNA<sup>-</sup> cells. Transcripts coding for proteins currently known to support virion entry were also either  
479 absent (EGFR, THY1/CD90 and ITGB3) or found in only a minute proportion of cells (ITGAV,

480 ITGA2, ITGA6 and PDGFRA), while more abundant levels of transcripts coding for BSG and ITGB1  
481 did not selectively partition with viral RNA<sup>+</sup> cells. Because our myeloid cell cultures are highly  
482 heterogeneous (Fig 4), preferential infection of select sub-groups may still have been facilitated by the  
483 expression of specific genes. BSG, for instance, was present in 99% of GEMM cells but in only 60% of  
484 cluster 7 cells. Conversely, viral RNA<sup>-</sup> cells may have resisted infection owing to the expression of  
485 subset-specific molecules. However, the fact that no “universal” entry resistance/enabling gene(s),  
486 expressed by all viral transcript<sup>+/-</sup> cells, could be identified implies that such gene(s) may not exist.  
487 This is in contrast to other cell types such as endothelial and epithelial cells, whose infection instead  
488 depends on the expression of surface molecules (such as BSG), acting as receptors for specific  
489 glycoprotein complexes present on the virion’s surface [37].

490 Only a small fraction (~ 3%) of CMV-transcript<sup>+</sup> cells expressed multiple viral ORFs at high levels.  
491 Presumably, these represent cells that will progress toward lytic replication, as corroborated by the  
492 presence of early viral proteins in a similar proportion of cells (Fig 1 and Fig 3). Thus, we wondered  
493 about the fate of infection in the remainder of the cells, which contain lower amounts of viral  
494 transcripts, and no detectable viral proteins. Intriguingly, a similar scenario was recently encountered  
495 following single-cell RNA sequencing of TB40/E-infected CD14<sup>+</sup> and CD34<sup>+</sup> cells [90]. Elevated  
496 levels of viral transcripts were observed in just ~ 2% of monocytes, while the rest of the population,  
497 which contained lower amounts of a wide range of viral transcripts, were interpreted as potentially  
498 being latently infected. This led us to speculate that the remaining CMV-transcript<sup>+</sup> cells in our  
499 population might be either latently infected or on a path toward latency. While this hypothesis requires  
500 additional testing, it remains a thrilling possibility, especially in view of recently presented evidence  
501 supporting the potential association of viral latency with quantitative rather than qualitative changes in  
502 viral gene expression [90]. Alternatively, it is of course possible for viral transcripts to simply be  
503 detected and eliminated by cellular defense mechanisms, producing an abortive infection.

504 Although expression of CD207/langerin and CD1a was observed in a number of cells within the  
505 population, Langerhans cells did not appear to be the main source of infected cells, at least at day one  
506 pi. Rather, multiple lines of evidence indicate that CMV<sup>+</sup> cells derive from a cluster with the hallmarks  
507 of GEMM colony forming units, albeit devoid of transcripts coding for some of the markers  
508 traditionally used to describe this population, *i.e.* CD34, CD38, and CD123. As none of the genes we  
509 and others [47, 48] found to be selectively expressed by these cells encode surface molecules, their  
510 isolation from either *in vitro* differentiated myeloid populations or hematopoietic tissues is particularly  
511 challenging. Consequently, we do not currently have direct evidence that this specific cell type can  
512 support CMV lytic infection *in vivo*.

513 Very recent data from single-cell RNA-seq analyses of hematopoietic processes have revealed that  
514 lineage development is a continuous process, more usefully depicted by Waddington's landscapes [91],  
515 than by more rigid cell differentiation trees. In this emergent scenario, CD34<sup>+</sup> HSC are visualized as  
516 beads rolling along a surface stretching from a higher to a lower point in space, and containing ridges  
517 and valleys. These ridges, corresponding to barriers separating individual lineages, are smaller near the  
518 top and become increasingly higher towards the bottom as expression of fate mediators progresses in  
519 each cell. Once ridges become too high cells can no longer change their identity and terminal lineages  
520 are established [47, 48, 92, 93]. We believe that the permissive cell type we identified in this study  
521 corresponds to a mid-point along this surface, characterized by the loss of pluripotency, but not yet  
522 enclosed by the high ridges separating granulocytes, monocytes, erythrocytes and megakaryocytes  
523 from each other. While this cell type is likely to exist *in vivo*, it may have been missed in previous  
524 studies of CMV tropism due to its rarity, and/or to the lack of specific surface markers.

525 An interesting question in this regard is: when did these cells arise during CD34<sup>+</sup> HSC  
526 differentiation, and what factors influence this process? The CD34<sup>+</sup> cells we employed in this study  
527 were isolated from cord blood and were amplified for 8-10 days in the presence of FL, stem cell factor

528 (SCF), and thrombopoietin (TPO) before differentiation. Others have shown that GEMM cell numbers  
529 increase by 850-fold during culture of CD34<sup>+</sup> cord blood cells in the presence of FL and TPO for 15  
530 weeks [94], while CD34<sup>+</sup> HSC from peripheral blood produce lower total cell numbers and colony  
531 forming units than CD34<sup>+</sup> HSC from cord blood after three weeks of exposure to FL plus TPO or FL  
532 plus TPO plus SCF [95]. Rather interestingly, HSC expansion was also associated with the rapid loss  
533 of the CD34 marker [95]. These data suggest that cord blood-derived HSC might have a stronger  
534 propensity to develop into GEMM cell-containing populations than cell populations isolated from  
535 peripheral blood or bone marrow. FL, SCF, and TPO promote self-renewal of CD34<sup>+</sup> cells and have  
536 been used to expand cord blood HSC *in vitro* for therapeutic intervention [94-98]. While all three  
537 cytokines stimulate HSC division, TPO also drives megakaryocyte development [99], and FL, which  
538 steers hematopoiesis toward the lympho-myeloid lineage at the expense of  
539 erythrocytes/megakaryocytes, is essential for the generation of dendritic cells [100]. Thus, in addition  
540 to stimulating HSC proliferation, these cytokines may have provided the very first “ridges”, nudging  
541 HSC differentiation toward GEMM cells. Intriguingly, we were able to detect the presence of progeny  
542 virus in the culture supernatant of amplified (but not of non-amplified) CD34<sup>+</sup> cells exposed to  
543 TB40/E, albeit with low frequencies (not shown). This led us to wonder if, perhaps, GEMM cells might  
544 be present in amplified HSC cultures even before exposure to the differentiation cocktail. Thus, cell  
545 culture conditions are critical when studying HSC in conjunction with CMV. CD34<sup>+</sup> cells are  
546 extremely plastic, and can clearly give rise to clustered sub-populations of myeloid cells, some of  
547 which permissive to lytic infection. Being a minority in the population these clusters can easily escape  
548 detection and may introduce unwanted and unnoticed “lytic noise” [90] in studies of viral latency.

549 While the reason for the preferential infection of CMV-transcript<sup>+</sup> cells remains unclear, our data  
550 provide a plausible rationale for initiation of lytic infection in GEMM cells; *i.e.*, their higher expression  
551 of multiple gene products involved in energy, RNA, and protein production, as well as in cell cycle



552 control, which likely create an intracellular environment particularly conducive to infection onset by  
553 lowering the amount of energy required from viral effectors to steer cellular processes away from cell  
554 needs and toward viral replication.

555 We initially reported the up-regulation of numerous genes with functions in mitochondrial  
556 oxidative phosphorylation, fatty acid  $\beta$ -oxidation, and malate-aspartate, ATP, and citrate transport  
557 systems in infected fibroblasts at late times pi [53]. Our findings were subsequently confirmed and  
558 expanded by a number of studies in fibroblasts and other cell types [101-104]. To our knowledge, the  
559 current work is the first report showing that a strong transcriptional induction of this type of genes also  
560 occurs in myeloid cells and at early times post-entry (Fig 7), making it a hallmark of CMV infection in  
561 different cell types and a requirement for successful viral replication.

562 The cell cycle is also a very well-known target during viral infection. Multiple studies have shown  
563 that CMV infection drives host cells into the G1/S phase to shunt cellular resources required for DNA  
564 synthesis and repair toward viral rather than cellular genome replication. Manipulation of cell cycle  
565 functions occurs at multiple levels, including protein transcription, translation, stability,  
566 posttranslational modification, and subcellular localization [105]. We previously showed that CMV  
567 infection is associated with a very strong positive impact on the expression of multiple S phase, M  
568 phase, and DNA activity regulators in fibroblasts, leading to the appearance of aberrant mitotic figures,  
569 which we called pseudomitosis, at late times pi [53, 58]. Here, we found that expression of genes  
570 involved in S phase control was higher in GEMM cells and remained high in CMV<sup>+</sup> cells, whereas  
571 transcription of M phase regulators was reduced (Fig 7). While fibroblasts were infected at confluency  
572 (when the majority of the cells are in G0/G1), GEMM cells were likely actively proliferating at the  
573 moment of contact with CMV. We thus believe that our new data highlight the exquisite ability of  
574 infection to fine tune its impact on gene transcription according to the conditions of the cell at the time  
575 of entry, in order to reach optimal expression levels of specific genes useful to viral replication.

576 Although entry into mitosis is clearly detrimental to viral replication [106], the presence of select M  
577 phase proteins may be needed to perform specific tasks, such as viral genome compaction,  
578 disentangling, or transport. To reach an ideal protein concentration these genes may thus need to be  
579 transcriptionally upregulated in quiescent fibroblasts, whereas downregulation may prevail when cells  
580 are already actively cycling.

581 High expression levels of genes involved in RNA processing, splicing, and translation were not  
582 unexpected for metabolically active cells such as GEMM, and neither was it surprising that they were  
583 maintained in CMV<sup>+</sup> cells (Fig 8). Indeed, a similar scenario was observed by us [53] and others [107]  
584 in infected fibroblasts. Again, our data validate and expand these findings to include myeloid cells,  
585 clearly marking these metabolic processes as pivotal for successful infection.

586 Expression of several genes with essential roles in hematopoietic development was also altered in  
587 CMV<sup>+</sup> cells (Fig 8). These include HOPX, which regulates primitive hematopoiesis [108], BATF3,  
588 vital for the development of conventional cross-presenting CD8 $\alpha$ <sup>+</sup> dendritic cells, ID2, whose  
589 expression in CD34<sup>+</sup> HSC inhibits the development of dendritic cell precursors [109], RUNX3, whose  
590 depletion leads to defects in the proliferation and differentiation of activated cytotoxic CD8<sup>+</sup> T cells,  
591 helper Th1 cells and NK cells, and to the disappearance of skin Langerhans cells [110], IKZF1,  
592 essential for normal lymphopoiesis and for myeloid, megakaryocyte and erythroid differentiation [111],  
593 and SPI1/PU.1, which is critical for the generation of all hematopoietic lineages [112]. If dysregulated  
594 expression of these genes also occurs in infected progenitors *in vivo*, it may powerfully affect the  
595 development and functions of multiple arms of the hematopoietic system, providing potential new  
596 culprits for the infection-associated problems ensuing congenital infection and hematopoietic stem cell  
597 transplantation.

598 Finally, we observed a much stronger negative impact of infection on the expression of genes with  
599 functions in the production and responses to IFN than previously reported, accompanied by the

600 induction of a very small, and possibly selected, number of genes. To our knowledge this is the first  
601 analysis of transcriptional responses to CMV infection in myeloid cells conducted at the single-cell  
602 level and, hence, capable of comparing gene expression levels in lytically infected cells to those in  
603 bystander cells co-existing within the same population. Our data thus provide a new perspective on  
604 how host defenses are raised and subsequently offset by the virus, in contrast to previous analyses that  
605 compared mean gene expression levels in CMV-infected samples to those in separate mock-infected  
606 cells [113-117]. Aside from the detection method, differences may also depend on the time pi, the cell  
607 type, and the strain of virus used. Infection recognition was shown to occur very rapidly in monocytes  
608 and fibroblasts, leading to the activation of the transcription factors IRF3 and NF- $\kappa$ B, and to the  
609 implementation of the IFN transcriptional program within 4-8 hours [113, 114, 116, 118-122].  
610 Structural components of the virion, such as the tegument proteins pp65 and/or pp71 [113, 114, 123,  
611 124], as well as viral immediate-early and early proteins [125, 126] then cooperate to blunt these  
612 responses via multiple mechanisms, including inactivation of the double-stranded DNA sensor  
613 MB21D1/cGAS, blockage of the STING-TBK1-IRF3 complex assembly, inhibition of NF- $\kappa$ B binding  
614 to DNA, and degradation of the signal transduction molecules JAK1 and STAT2 [123, 124, 127-132].  
615 IFN-related genes that are highly transcribed at 4-8 hours pi may thus be downregulated at 24 hours pi,  
616 or upon full implementation of viral countermeasures. The importance of viral anti-IFN defenses is  
617 indeed underscored by the fact that five of the nine genes more abundantly expressed in CMV<sup>-</sup> cells  
618 encode IFN-induced antiviral proteins (MX1, OAS1, OAS2, IFIT3, and USP18, Supplementary Fig 1),  
619 suggesting that effective downregulation of their expression could not be achieved in the absence of  
620 specific viral gene products.

621 Basal expression of sensors, signal transducers, and IFN-inducible genes as well as the speed and  
622 strength whereby antiviral responses are mounted can also be cell type dependent [133]. IRF3 and  
623 IRF7, for instance, were shown to be required for IFN- $\beta$  induction in response to West Nile virus

624 infection in murine fibroblasts but not in macrophages and dendritic cells, implying that detection of  
625 viral components proceeds via different pathways in these cell types [134]. Myeloid cell responses to  
626 CMV infection may thus differ from those of fibroblasts, while in latently-infected monocytes, IFN-  
627 related gene expression may remain high due to the absence of viral lytic proteins.

628 Finally, cell responses may also be affected by the virus strain, as virion content of pp65, reported  
629 to block IFN induction at very early times post-entry [113, 135], was shown to vary dramatically in  
630 different CMV strains [136], while STAT2 degradation was observed to occur in fibroblasts infected  
631 with CMV clinical isolates or with strain AD169, but not strain Towne [128]. Altogether, our data  
632 broaden the number of IFN-related genes susceptible to transcriptional regulation by CMV to include  
633 effectors with currently no known role in CMV infection inhibition, which may thus represent new host  
634 encoded anti- or pro-viral proteins.

635 In summary, our data provide evidence in favor of the existence of a new type of myeloid cells  
636 potentially permissive to CMV lytic infection, offer a reasonable theory regarding their preferential  
637 infection over other cell types present in the same population, substantially expand our understanding  
638 of the cellular determinants of CMV tropism for myeloid and other types of cells, and provide new  
639 candidate pro- and anti-viral molecules for future studies and potential therapeutic interventions.  
640

## 641 **MATERIALS AND METHODS**

642 **Cells and virus.** Umbilical cord blood CD34<sup>+</sup> HSC were purchased from STEMCELL Technologies  
643 Inc, Vancouver, Canada and pre-amplified in  $\alpha$ -Minimum Essential Medium (Thermo Fisher  
644 Scientific, Waltham, MA) supplemented with 20% heat-inactivated FBS (Gibco, Fisher Scientific,  
645 Waltham, MA), 375 ng/ml of FL, 50 ng/ml of SCF and 50 ng/ml of TPO for 8-10 days at a density of 1  
646  $\times 10^4$  cells/well in 48-well tissue culture plates. Cells were then differentiated in serum-free X-VIVO  
647 15 medium (Lonza/BioWhittaker, Allendale, NJ) supplemented with 1,500 IU/ml of GM-CSF  
648 (Leukine Sargramostim), 150 ng/ml of FL, 10 ng/ml of SCF, 2.5 ng/ml of tumor necrosis factor- $\alpha$ , and  
649 0.5 ng/ml of transforming growth factor  $\beta$ 1 for eight days at a density of 1  $\times 10^5$  cells/well in 48-well  
650 plates. Activation of differentiated cells was then induced by exposure to X-VIVO 15 medium  
651 containing 10% standard FBS (US origin, Gibco, Fisher Scientific, Waltham, MA), 1,500 IU/ml of  
652 GM-CSF, 200 ng/ml of CD40L, and 500 ng/ml of LPS (Sigma-Aldrich, St. Louis, MO) for two days at  
653 a density of 1  $\times 10^5$  cells/well in 48-well plates. All cytokines were from Peprotech, Rocky Hill, NJ.  
654 Human foreskin fibroblasts were propagated in Dulbecco's Modified Eagle Medium (Corning Cellgro,  
655 UCSF CCF, San Francisco, CA) supplemented with 10% fetal clone serum III, 100 U/ml penicillin,  
656 100  $\mu$ g/ml streptomycin, 4 mM HEPES (all from HyClone, Fisher Scientific, Pittsburgh, PA), and 1  
657 mM sodium pyruvate (Corning Cellgro, UCSF CCF, San Francisco, CA). CMV strain TB40/E, a gift  
658 from C. Sinzger (University of Ulm, Ulm, Germany), was propagated on fibroblasts and purified by  
659 ultracentrifugation as previously described [53].

660 **Myeloid cell infection.** Differentiated myeloid cell populations were exposed to TB40/E at a  
661 calculated MOI of ten for four hours, washed twice and further cultured for ten days. Cells were  
662 harvested on days 2, 4, 6, 8, and 10 pi, counted, and used in immunofluorescence staining analyses and  
663 titration assays.

664 **Immunofluorescence staining analyses.** Cell staining was performed as previously described [16].

665 Briefly, cytospin preparations of myeloid cells were fixed in 1.5% formaldehyde for 30 min,  
666 permeabilized in 0.5% Triton-X 100 for 20 min, and blocked in 40% FBS/40% goat serum for 30 min  
667 before incubation with antibodies directed against the viral proteins IE1/IE2 (MAb810, 1:600, or  
668 AF488 MAB810X, 1:200, Millipore, Temecula, CA), UL32 (pp150, 1:400, a kind gift from Bill Britt,  
669 University of Alabama, Birmingham), UL84 (1:500, Virusys, Taneytown, MD), UL44 (1:200, Virusys,  
670 Taneytown, MD), or UL57 (1:100, Virusys, Taneytown, MD) for one hour, followed by secondary  
671 antibodies conjugated to Alexa-Fluor 488 or Alexa-Fluor 594 (1:200, Invitrogen, Carlsbad, CA, and  
672 Jackson Immunoresearch, West Grove, PA) for another hour. Nuclei were labeled with Hoechst 33342  
673 (0.2 mg/ml; Molecular Probes, Eugene, OR) for three min. Samples were viewed using a Nikon Eclipse  
674 E600 fluorescence microscope equipped with Ocular imaging software.

675 **Virus titrations.** Cell-associated virus was released from pelleted myeloid cells by sonication for ~ 5-  
676 10 seconds on ice using a Branson Ultrasonics Sonifier 150 and incubated with fibroblasts for one  
677 hour. After 24 hours infected fibroblasts were stained for IE1/IE2 expression.

678 **Statistical analysis.** All data were analyzed using Prism 7 (GraphPad Software). Unpaired t-tests were  
679 used to compare data from non-activated and activated cells in Fig 3. Differences were considered  
680 significant at  $P < 0.05$ . The Wilcoxon signed rank sum test was used to compare median ratio values  
681 from data distributions with a hypothetical median of zero.

682 **Single-cell RNA-seq generation and analysis.** Activated myeloid cells differentiated from the CD34<sup>+</sup>  
683 HSC of a representative donor (113G) were infected with TB40/E at an MOI of 10, washed twice, and  
684 further incubated for 24 hours. Cells were then processed through the Chromium Single-cell 3' v2  
685 Library Kit (10X Genomics) by the Genetic Resources Core Facility Cell Center and BioRepository,  
686 Johns Hopkins University, Baltimore, MD. Briefly, 10,000 cells were loaded onto a single channel of  
687 the 10X Chromium Controller. Messenger RNA from approximately ~ 7,000 cells captured and lysed  
688 within nanoliter-sized gel beads in emulsion was then reverse transcribed and barcoded using polyA

689 primers with unique molecular identifier sequences before being pooled, amplified, and used for library  
690 preparation. The library was then sequenced in two lanes of an Illumina HiSeq 2500 Rapid Flowcell  
691 system. Demultiplexing of the bcl file into a FASTQ file was performed using Cell Ranger mkfastq  
692 software, and alignments to human (hg19) or TB40E (NCBI EF999921.1) genome reference sequences  
693 were performed using STAR [137]. Dimensionality reduction of data was performed by principal  
694 component analysis using N= 10 principal components, and reduced data were visualized in two  
695 dimensions using the *t*-SNE nonlinear dimensionality reduction method [18]. Clustering for expression  
696 similarity was performed using both graph-based and K-means (with K=10 clusters) methods by Cell  
697 Ranger [42]. Clusters and differential expression analyses generated by Cell Ranger were then  
698 visualized using Loupe™ Cell Browser [19]. For each gene in each cluster, three values were  
699 computed and reported in supplemental datasets: 1) the mean number of unique molecular identifier  
700 counts; 2) the log2 fold-change of each gene's expression in cluster x relative to other clusters and 3)  
701 the p-value denoting significance of each gene's expression in cluster x relative to other clusters,  
702 adjusted to account for the number of hypotheses (*i.e.*, genes) being tested.

703 **Monocle clustering and single cell ordering in pseudotime.** Cells belonging to the cluster 7, erythro,  
704 mono, MDCC, CMV<sup>+</sup>, promyelo, act neut, and sub-cluster 3 groups depicted in Fig 4C were used for  
705 pseudotime analysis. Gene-cell matrices produced by Cell Ranger were loaded into R with  
706 `cellrangerRkit` ([https://support.10xgenomics.com/single-cell-gene-](https://support.10xgenomics.com/single-cell-gene-expression/software/pipelines/latest/rkit)  
707 `expression/software/pipelines/latest/rkit`) and pseudo-temporal assignment was performed with  
708 Monocle version 2.99.0 (39) using N = 5 principal components. Marker genes were found using  
709 Seurat's FindAllMarkers function [52], and groups were identified based on the expression of gene  
710 markers from Fig 4C and S6 Fig. The root of the tree was manually selected using `orderCells` from  
711 Monocle, defined by the point of origin of the majority of the branches.

712

713 **Data availability.** All single-cell data files are deposited in Gene Expression Omnibus under accession  
714 number GSExx.  
715



716 **FIGURE LEGENDS**

717

718 **Figure 1. Susceptibility to CMV infection of non-activated and activated myeloid cell populations**

719 **differentiated from cord blood CD34<sup>+</sup> HSC from different donors.** Non-activated and activated  
720 myeloid cell populations differentiated from cord blood CD34<sup>+</sup> HSC from twelve different donors were  
721 exposed to CMV strain TB40/E at an MOI of ten and analyzed at the indicated days pi. A small portion  
722 of each population was subjected to immunofluorescence staining to determine the number of IE1/IE2<sup>+</sup>  
723 cells present in each well (A-B), while the remainder of the cells were sonicated and used in titration  
724 assays to quantify intracellular progeny yields (C-D). Open circles represent data from individual  
725 donors; red squares indicate median values at each time point; salmon circles depict data obtained from  
726 the CD34<sup>+</sup> HSC of representative donor 113G.

727

728 **Figure 2. Detection of viral transcripts in a large proportion of cells in the population.** (A-B) *t*-

729 SNE projections of data from each of the 6,837 profiled cells depicted as dots colored based on their  
730 content in transcripts mapping to viral ORFs and displayed in a quantitative (A) or qualitative (B)  
731 manner. In A, cells lacking detectable viral transcripts are shown in grey, while cells containing viral  
732 RNAs are colored in shades of red depending on transcript amounts ( $\text{Log}_2$  Gene Exp Max). In B, cells  
733 containing or lacking viral transcripts are shown in orange and blue, respectively. (C) Merged  
734 representative image of activated myeloid cells infected with TB40/E at an MOI of ten, harvested at  
735 day one pi, and stained for pp150, to visualize viral particles (arrow), and with Hoechst 33342 to  
736 visualize cell nuclei (N). (D) Number of pp150<sup>+</sup> particles per cell at day one and day four pi, manually  
737 counted from 5-15 images/sample of non-activated and activated myeloid cells in four independent  
738 experiments. Median and median absolute deviation values are shown.

739 **Figure 3. Detection of viral transcripts associated with progression toward lytic replication in a**  
740 **specific subset of cells.** (A) *t*-SNE projection of data from profiled cells colored based on their  
741 quantitative ( $\text{Log}_2$  Gene Exp Max) cumulative content in transcripts mapping to the viral RNAs  
742 UL122, UL123, UL112/113, UL84, TRS1, UL36, UL37, UL38, UL54, UL44, UL102, UL105, UL70  
743 or UL57. (B-D) Merged representative images of activated myeloid cell populations infected with  
744 TB40/E at an MOI of ten, harvested at day two pi, and co-stained for IE1/IE2 (green) plus UL84 (red,  
745 B), or UL44 (red, C) or UL57 (red, D) and with Hoechst 33342 (blue) to visualize cell nuclei. Cells  
746 expressing both IE1/IE2<sup>+</sup> and the marker protein of interest appear yellow. (E) Percentage of IE1/IE2<sup>+</sup>  
747 cells co-expressing the UL84, UL44, or UL57 proteins at day two pi, manually counted from 5-15  
748 images/sample of non-activated and activated myeloid cells in seven independent experiments. Median,  
749 median absolute deviation and P values from unpaired T tests are shown.

750

751 **Figure 4: Identification of cluster 6 as the most closely related to the CMV<sup>+</sup> cluster.**

752 (A) *t*-SNE projection of data from profiled cells partitioned into clusters by the K-means clustering  
753 algorithm using  $K = 10$ . (B) Distribution of  $\text{Log}_2$  ratio values obtained by dividing the mean number of  
754 transcripts/cell for each gene in the CMV<sup>+</sup> cluster by the mean number of transcripts/cell for each gene  
755 in each of the other nine clusters. The distribution with the  $\text{Log}_2$  mean value closest to zero (dotted  
756 vertical line) is depicted by a red line. (C) *t*-SNE projection of data from profiled cells partitioned into  
757 clusters by the K-means clustering algorithm using  $K = 10$ , and further sub-divided based on marker  
758 gene expression. (D) Distribution of  $\text{Log}_2$  ratio values, as described in (B), comparing the CMV<sup>+</sup>  
759 cluster the other 13 clusters. CL = cluster; Erythro = erythrocytes-megakaryocytes; Mono = monocytes;  
760 MDDC = monocyte-derived dendritic cells; LC = Langerhans cells; Promyelo = promyelocytes; Act  
761 Neut = activated neutrophils; GEMM = colony-forming unit-granulocyte, erythrocyte,  
762 monocyte/macrophage, megakaryocyte.

763 **Figure 5. Identification of sub-cluster 3 as the origin of promyelocytes, activated neutrophils,**  
764 **erythrocytes, megakaryocytes, monocytes, and CMV<sup>+</sup> cells.** (A) Pseudotime ordering of data from  
765 cells belonging to the CL7, erythro, mono, MDDC, CMV, promyelo, act neut and sub-cluster 3 groups  
766 shown in Fig 4C into a two-dimensional component space using Monocle. The main path of the  
767 minimum spanning tree is depicted by solid black lines arising from a central root of cells with a  
768 pseudotime of zero (dark blue dots), and branching outward to clusters with higher pseudotime values,  
769 representing differentiated cell types (purple, orange and yellow dots). (B) Cell group labeling based  
770 on the expression of key marker genes identified with Seurat. GR = group; MDDC = monocyte-  
771 derived dendritic cells; CL7 = CL7 from Fig 4C; GEMM = colony-forming unit-granulocyte,  
772 erythrocyte, monocyte/macrophage, megakaryocyte; Mono = monocytes; Erythro = erythrocytes; Act  
773 Neut = activated neutrophils; Promyelo = promyelocytes.

774

775 **Figure 6. Differential expression of genes belonging to multiple functional categories in GEMM**  
776 **cells, CMV<sup>+</sup> cells, and in the rest of the population.** Log<sub>2</sub> ratio value distributions obtained by  
777 dividing the mean number of transcripts/cell for each gene in the CMV<sup>+</sup> or GEMM clusters by the  
778 mean number of transcripts/cell in the rest of the cells (CMV/REST, green line, and GEMM/REST,  
779 blue line) or in GEMM cells (CMV/GEMM, red line). The distribution obtained from all genes is  
780 shown in (A), while B-N show the distributions of genes falling in each functional category. The  
781 Wilcoxon signed rank test was used to identify populations with median values significantly different  
782 from zero. The population with the lowest P value is highlighted by coloring of the area under the  
783 curve. The dashed line marks the ratio = 1 point. N = number of genes in each category;  
784 ADH/MOTIL/CYTOSK = adhesion/motility/cytoskeleton; IFN = interferon; PROLIF/CELL CYCLE  
785 = proliferation/cell cycle; SF-R-SIGNALING = soluble factors/receptors/signaling.

786 **Figure 7. Differential expression of genes with roles in mitochondrial function and proliferation**  
787 **control in GEMM cells, CMV<sup>+</sup> cells, and the rest of the population.** Heatmap (A and B) and  
788 distributions (C-H) of Log<sub>2</sub> ratio values obtained by dividing the mean number of transcripts/cell of  
789 genes with roles in mitochondrial functions (A and C-E) and in proliferation control (B and F-H) as  
790 found in the CMV<sup>+</sup> or GEMM clusters by the mean number of transcripts/cell in the rest of the cells  
791 (CMV/REST, green line, and GEMM/REST, blue line) or in GEMM cells (CMV/GEMM, red line).  
792 The heatmap color scales refer to the Log<sub>2</sub> ratio values. The Wilcoxon signed rank test was used to  
793 identify populations with median values significantly different from zero. The population with the  
794 lowest P value is highlighted by coloring of the area under the curve. The dashed line marks the ratio =  
795 1 point. N = number of genes in each category.

796

797 **Figure 8. Differential expression of genes with roles in RNA metabolism in GEMM cells, CMV<sup>+</sup>**  
798 **cells, and the rest of the population.** Heatmap (A, E and F) and distributions (B-D) of Log<sub>2</sub> ratio  
799 values obtained by dividing the mean number of transcripts/cell of genes with roles in RNA  
800 transcription, processing and translation as found in the CMV<sup>+</sup> or GEMM clusters by the mean number  
801 of transcripts/cell in the rest of the cells (CMV/REST, green line, and GEMM/REST, blue line) or in  
802 GEMM cells (CMV/GEMM, red line). The heatmap color scales refer to the Log<sub>2</sub> ratio values.  
803 Numbers in white font in E and F report the Log<sub>2</sub> ratio values of each gene. The Wilcoxon signed rank  
804 test was used to identify populations with median values significantly different from zero. The  
805 population with the lowest P value is highlighted by coloring of the area under the curve. The dashed  
806 line marks the ratio = 1 point. N = number of genes in each category.

807

808

809 **Figure 9. Differential expression of genes with roles in protein metabolism and antigen**  
810 **presentation in GEMM cells, CMV<sup>+</sup> cells, and the rest of the population.** Heatmap (A, E, F and G)  
811 and distributions (B-D) of Log<sub>2</sub> ratio values obtained by dividing the mean number of transcripts/cell of  
812 genes with roles in protein metabolism as found in the CMV<sup>+</sup> or GEMM clusters by the mean number  
813 of transcripts/cell in the rest of the cells (CMV/REST, green line, and GEMM/REST, blue line) or in  
814 GEMM cells (CMV/GEMM, red line). The heatmap color scales refer to the Log<sub>2</sub> ratio values.  
815 Numbers in white font in E-G report the Log<sub>2</sub> ratio values of each gene. The Wilcoxon signed rank test  
816 was used to identify populations with median values significantly different from zero. The population  
817 with the lowest P value is highlighted by coloring of the area under the curve. The dashed line marks  
818 the ratio = 1 point. N = number of genes in each category.

819

820 **Figure 10. Differential expression of IFN-related genes in GEMM cells, CMV<sup>+</sup> cells, and the rest**  
821 **of the population.** Heatmap of Log<sub>2</sub> ratio values obtained by dividing the mean number of  
822 transcripts/cell of IFN-related genes as found in the CMV<sup>+</sup> or GEMM clusters by the mean number of  
823 transcripts/cell in the rest of the population (CMV/REST and GEMM/REST) or in GEMM cells  
824 (CMV/GEMM). The heatmap color scale refers to the Log<sub>2</sub> ratio values. Numbers in white font report  
825 the Log<sub>2</sub> ratio values of each gene.

826

827 **SUPPORTING INFORMATION**

828 **S1 Dataset.** Cellular genes differentially expressed in CMV-transcript<sup>+</sup> versus CMV-transcript<sup>-</sup> cells at  
829  $P < 0.05$ .

830 **S2 Dataset.** Full name and symbol of genes mentioned in the text.

831 **S3 Dataset.** Cellular genes with four-fold higher mean expression levels in CMV<sup>-</sup> than in CMV<sup>+</sup> cells  
832 and present in more than 50% of CMV<sup>-</sup> cells, but less than 50% of CMV<sup>+</sup> cells.

833 **S4 Fig.** Transcript abundance and distribution of the nine cellular genes with four-fold higher mean  
834 expression levels in CMV<sup>-</sup> than in CMV<sup>+</sup> cells and present in more than 50% of CMV<sup>-</sup> cells, but less  
835 than 50% of CMV<sup>+</sup> cells.

836 *t*-SNE projection of data from profiled cells colored based on their quantitative ( $\text{Log}_2$  Gene Exp Max)  
837 content in transcripts mapping to the cellular genes named in each box. The proportion of CMV<sup>+</sup> and  
838 CMV<sup>-</sup> cells expressing each gene is indicated beside the CMV<sup>+</sup> cluster and in the bottom right corner  
839 of each box, respectively.

840 **S5 Dataset.** Cellular genes significantly enriched ( $\text{Log}_2$  fold change  $> 4$ ,  $P$  values  $< 10^{-15}$ ) in cluster 6  
841 relative to the rest of the population.

842 **S6 Fig.** Transcript abundance and distribution of promyelocytes, activated neutrophils, and sub-cluster  
843 3 cellular gene markers. *t*-SNE projection of data from profiled cells colored based on their quantitative  
844 ( $\text{Log}_2$  Gene Exp Max) content in transcripts mapping to the genes listed in the lower left corner of each  
845 panel and corresponding to the promyelocytes (A), activated neutrophils (B), or sub-cluster 3/GEMM  
846 (C) clusters in Fig 4C.

847 **S7 Dataset.** Expression distribution of the 115 cellular genes characterizing sub-cluster 3 as compared  
848 to data from Velten L. et al and Karamitros D. et al.

849 **S8 Fig.** Transcript abundance of gene markers used to characterize the cell groups shown in Fig 5.  
850 Monocle pseudotime trajectory of cells colored based on their content in transcripts mapping to the

851 genes listed in the upper left corner of each panel and corresponding to the GR A – MDDC (A), GR B  
852 – CL7 (B), GR C – CMV (C), GR D – GEMM (D), GR E – Mono (E), GR F – Erythro (F), GR G –  
853 Act Neut (G), and GR H – Promyelo (H) groups in Fig 5B.

854 **S9 Dataset.** Cellular genes differentially expressed in each of the eight groups generated by Monocle  
855 as depicted in Fig 5.

856 **S10 Dataset.** Cellular genes differentially expressed in GEMM and CMV<sup>+</sup> cells relative to the rest of  
857 the population and their partitioning into functional categories.

858

## 859 **ACKNOWLEDGMENTS**

860 We thank Melissa Olson, Director, Genetics Research Core Facility and Biorepository & Cell Center  
861 and David Mohr, Director, High Throughput Sequencing at the Johns Hopkins Medical Institutes,  
862 Baltimore MD for technical assistance with single-cell RNA-seq analyses using the 10X genomics  
863 Chromium platform. We are also grateful to Aharon Nachshon, Weizmann Institute of Science, for  
864 sharing the annotated reference for the TB40/E transcription units, to Christian Sinzger for the kind gift  
865 of CMV strain TB40/E, and to Bill Britt for providing us with the anti-pp150 antibodies.

866

## 867 REFERENCES

- 868 1. Griffiths P, Plotkin S, Mocarski E, Pass R, Schleiss M, Krause P, et al. Desirability and  
869 feasibility of a vaccine against cytomegalovirus. *Vaccine*. 2013;31 Suppl 2:B197-203. Epub  
870 2013/04/26. doi: S0264-410X(12)01534-4 [pii]  
871 10.1016/j.vaccine.2012.10.074. PubMed PMID: 23598482.
- 872 2. Pass RF. Cytomegalovirus. In: Howley DKaP, editor. *Fields virology*. Philadelphia:  
873 Lippincott/The Williams & Wilkins Co.; 2001. p. 2675-705.
- 874 3. Dupont L, Reeves MB. Cytomegalovirus latency and reactivation: recent insights into an age  
875 old problem. *Rev Med Virol*. 2016;26(2):75-89. doi: 10.1002/rmv.1862. PubMed PMID: 26572645;  
876 PubMed Central PMCID: PMC5458136.
- 877 4. Sinclair J, Reeves M. The intimate relationship between human cytomegalovirus and the  
878 dendritic cell lineage. *Frontiers in microbiology*. 2014;5:389. doi: 10.3389/fmicb.2014.00389. PubMed  
879 PMID: 25147545; PubMed Central PMCID: PMC4124589.
- 880 5. Hertel L. Human cytomegalovirus tropism for mucosal myeloid dendritic cells. *Rev Med Virol*.  
881 2014;24(6):379-95. doi: 10.1002/rmv.1797. PubMed PMID: 24888709; PubMed Central PMCID:  
882 PMC4213286.
- 883 6. Stevenson EV, Collins-McMillen D, Kim JH, Cieply SJ, Bentz GL, Yurochko AD. HCMV  
884 reprogramming of infected monocyte survival and differentiation: a Goldilocks phenomenon. *Viruses*.  
885 2014;6(2):782-807. doi: 10.3390/v6020782. PubMed PMID: 24531335; PubMed Central PMCID:  
886 PMC3939482.
- 887 7. Kondo K, Kaneshima H, Mocarski ES. Human cytomegalovirus latent infection of granulocyte-  
888 macrophage progenitors. *Proc Natl Acad Sci U S A*. 1994;91(25):11879-83. PubMed PMID: 7991550.
- 889 8. Goodrum FD, Jordan CT, High K, Shenk T. Human cytomegalovirus gene expression during  
890 infection of primary hematopoietic progenitor cells: a model for latency. *Proc Natl Acad Sci U S A*.  
891 2002;99(25):16255-60. PubMed PMID: 12456880.
- 892 9. Hertel L, Lacaille VG, Strobl H, Mellins ED, Mocarski ES. Susceptibility of immature and  
893 mature Langerhans cell-type dendritic cells to infection and immunomodulation by human  
894 cytomegalovirus. *J Virol*. 2003;77(13):7563-74. Epub 2003/06/14. PubMed PMID: 12805456; PubMed  
895 Central PMCID: PMC164783.
- 896 10. Reeves MB, Lehner PJ, Sissons JG, Sinclair JH. An in vitro model for the regulation of human  
897 cytomegalovirus latency and reactivation in dendritic cells by chromatin remodelling. *J Gen Virol*.  
898 2005;86(Pt 11):2949-54. PubMed PMID: 16227215.
- 899 11. Ibanez CE, Schrier R, Ghazal P, Wiley C, Nelson JA. Human cytomegalovirus productively  
900 infects primary differentiated macrophages. *J Virol*. 1991;65(12):6581-8. PubMed PMID: 1658363.
- 901 12. Strobl H, Bello-Fernandez C, Riedl E, Pickl WF, Majdic O, Lyman SD, et al. flt3 ligand in  
902 cooperation with transforming growth factor-beta1 potentiates in vitro development of Langerhans-  
903 type dendritic cells and allows single-cell dendritic cell cluster formation under serum-free conditions.  
904 *Blood*. 1997;90(4):1425-34. PubMed PMID: 9269760.
- 905 13. Strobl H, Krump C, Borek I. Micro-environmental signals directing human epidermal  
906 Langerhans cell differentiation. *Seminars in cell & developmental biology*. 2018. doi:  
907 10.1016/j.semcdb.2018.02.016. PubMed PMID: 29448069.
- 908 14. Lauron EJ, Yu D, Fehr AR, Hertel L. Human cytomegalovirus infection of langerhans-type  
909 dendritic cells does not require the presence of the gH/gL/UL128-131A complex and is blocked after  
910 nuclear deposition of viral genomes in immature cells. *J Virol*. 2014;88(1):403-16. Epub 2013/10/25.  
911 doi: 10.1128/JVI.03062-13. PubMed PMID: 24155395; PubMed Central PMCID: PMC3911714.



- 912 15. Coronel R, Takayama S, Juwono T, Hertel L. Dynamics of Human Cytomegalovirus Infection  
913 in CD34+ Hematopoietic Cells and Derived Langerhans-Type Dendritic Cells. *J Virol*.  
914 2015;89(10):5615-32. Epub 2015/03/13. doi: 10.1128/JVI.00305-15. PubMed PMID: 25762731;  
915 PubMed Central PMCID: PMC4442541.
- 916 16. Coronel R, Jesus DM, Dalle Ore L, Mymryk JS, Hertel L. Activation of Langerhans-Type  
917 Dendritic Cells Alters Human Cytomegalovirus Infection and Reactivation in a Stimulus-Dependent  
918 Manner. *Frontiers in microbiology*. 2016;7:1445. doi: 10.3389/fmicb.2016.01445. PubMed PMID:  
919 27683575; PubMed Central PMCID: PMC45021960.
- 920 17. 10XGenomics Chromium. <https://www.10xgenomics.com/solutions/single-cell/>. 2018.
- 921 18. van der Maaten LJP, Hinton GE. Visualizing High-Dimensional Data Using t-SNE. *Journal of*  
922 *Machine Learning Research*. 2008;9:2579-605.
- 923 19. CellBrowser. [https://support.10xgenomics.com/single-cell-gene-](https://support.10xgenomics.com/single-cell-gene-expression/software/visualization/latest/what-is-loupe-cell-browser)  
924 [expression/software/visualization/latest/what-is-loupe-cell-browser](https://support.10xgenomics.com/single-cell-gene-expression/software/visualization/latest/what-is-loupe-cell-browser). 2018.
- 925 20. Goodrum F, Jordan CT, Terhune SS, High K, Shenk T. Differential outcomes of human  
926 cytomegalovirus infection in primitive hematopoietic cell subpopulations. *Blood*. 2004;104(3):687-95.  
927 PubMed PMID: 15090458.
- 928 21. Bresnahan WA, Shenk TE. UL82 virion protein activates expression of immediate early viral  
929 genes in human cytomegalovirus-infected cells. *Proc Natl Acad Sci U S A*. 2000;97(26):14506-11.  
930 PubMed PMID: 11121054.
- 931 22. Greijer AE, Dekkers CA, Middeldorp JM. Human cytomegalovirus virions differentially  
932 incorporate viral and host cell RNA during the assembly process. *J Virol*. 2000;74(19):9078-82.  
933 PubMed PMID: 10982353; PubMed Central PMCID: PMC45102105.
- 934 23. Ogawa-Goto K, Tanaka K, Gibson W, Moriishi E, Miura Y, Kurata T, et al. Microtubule  
935 network facilitates nuclear targeting of human cytomegalovirus capsid. *J Virol*. 2003;77(15):8541-7.  
936 PubMed PMID: 12857923.
- 937 24. Miller MS, Hertel L. Onset of human cytomegalovirus replication in fibroblasts requires the  
938 presence of an intact vimentin cytoskeleton. *J Virol*. 2009;83(14):7015-28. Epub 2009/05/01. doi:  
939 JVI.00398-09 [pii] 10.1128/JVI.00398-09. PubMed PMID: 19403668; PubMed Central PMCID:  
940 PMC2704777.
- 941 25. Wang X, Huong SM, Chiu ML, Raab-Traub N, Huang ES. Epidermal growth factor receptor is  
942 a cellular receptor for human cytomegalovirus. *Nature*. 2003;424(6947):456-61. PubMed PMID:  
943 12879076.
- 944 26. Chan G, Nogalski MT, Yurochko AD. Activation of EGFR on monocytes is required for human  
945 cytomegalovirus entry and mediates cellular motility. *Proc Natl Acad Sci U S A*. 2009;106(52):22369-  
946 74. Epub 2009/12/19. doi: 0908787106 [pii]  
947 10.1073/pnas.0908787106. PubMed PMID: 20018733; PubMed Central PMCID: PMC2799688.
- 948 27. Kim JH, Collins-McMillen D, Buehler JC, Goodrum FD, Yurochko AD. Human  
949 Cytomegalovirus Requires Epidermal Growth Factor Receptor Signaling To Enter and Initiate the  
950 Early Steps in the Establishment of Latency in CD34(+) Human Progenitor Cells. *J Virol*. 2017;91(5).  
951 doi: 10.1128/JVI.01206-16. PubMed PMID: 27974567; PubMed Central PMCID: PMC45309964.
- 952 28. Buehler J, Zeltzer S, Reitsma J, Petrucelli A, Umashankar M, Rak M, et al. Opposing  
953 Regulation of the EGF Receptor: A Molecular Switch Controlling Cytomegalovirus Latency and  
954 Replication. *PLoS Pathog*. 2016;12(5):e1005655. doi: 10.1371/journal.ppat.1005655. PubMed PMID:  
955 27218650; PubMed Central PMCID: PMC44878804.
- 956 29. Soroceanu L, Akhavan A, Cobbs CS. Platelet-derived growth factor-alpha receptor activation is  
957 required for human cytomegalovirus infection. *Nature*. 2008;455(7211):391-5. PubMed PMID:  
958 18701889.

- 959 30. Kabanova A, Marcandalli J, Zhou T, Bianchi S, Baxa U, Tsybovsky Y, et al. Platelet-derived  
960 growth factor- $\alpha$  receptor is the cellular receptor for human cytomegalovirus gH/gL/gO trimer. *Nat*  
961 *Microbiol.* 2016;1(8):16082. doi: 10.1038/nmicrobiol.2016.82. PubMed PMID: 27573107; PubMed  
962 Central PMCID: PMCPMC4918640.
- 963 31. Wu Y, Prager A, Boos S, Resch M, Brizic I, Mach M, et al. Human cytomegalovirus  
964 glycoprotein complex gH/gL/gO uses PDGFR- $\alpha$  as a key for entry. *PLoS Pathog.*  
965 2017;13(4):e1006281. doi: 10.1371/journal.ppat.1006281. PubMed PMID: 28403202; PubMed Central  
966 PMCID: PMCPMC5389851.
- 967 32. Li Q, Wilkie AR, Weller M, Liu X, Cohen JI. THY-1 Cell Surface Antigen (CD90) Has an  
968 Important Role in the Initial Stage of Human Cytomegalovirus Infection. *PLoS Pathog.*  
969 2015;11(7):e1004999. doi: 10.1371/journal.ppat.1004999. PubMed PMID: 26147640; PubMed Central  
970 PMCID: PMCPMC4492587.
- 971 33. Li Q, Fischer E, Cohen JI. Cell Surface THY-1 Contributes to Human Cytomegalovirus Entry  
972 via a Macropinocytosis-Like Process. *J Virol.* 2016;90(21):9766-81. doi: 10.1128/JVI.01092-16.  
973 PubMed PMID: 27558416; PubMed Central PMCID: PMCPMC5068528.
- 974 34. Feire AL, Koss H, Compton T. Cellular integrins function as entry receptors for human  
975 cytomegalovirus via a highly conserved disintegrin-like domain. *Proc Natl Acad Sci U S A.*  
976 2004;101(43):15470-5. PubMed PMID: 15494436.
- 977 35. Feire AL, Roy RM, Manley K, Compton T. The glycoprotein B disintegrin-like domain binds  
978 beta 1 integrin to mediate cytomegalovirus entry. *J Virol.* 2010;84(19):10026-37. doi:  
979 10.1128/JVI.00710-10. PubMed PMID: 20660204; PubMed Central PMCID: PMCPMC2937812.
- 980 36. Wang X, Huang DY, Huong SM, Huang ES. Integrin  $\alpha$ v $\beta$ 3 is a coreceptor for human  
981 cytomegalovirus. *Nat Med.* 2005;11(5):515-21. PubMed PMID: 15834425.
- 982 37. Vanarsdall AL, Pritchard SR, Wisner TW, Liu J, Jardetzky TS, Johnson DC. CD147 Promotes  
983 Entry of Pentamer-Expressing Human Cytomegalovirus into Epithelial and Endothelial Cells. *MBio.*  
984 2018;9(3). doi: 10.1128/mBio.00781-18. PubMed PMID: 29739904; PubMed Central PMCID:  
985 PMCPMC5941078.
- 986 38. Pari GS, Anders DG. Eleven loci encoding trans-acting factors are required for transient  
987 complementation of human cytomegalovirus oriLyt-dependent DNA replication. *J Virol.*  
988 1993;67(12):6979-88. PubMed PMID: 8230421; PubMed Central PMCID: PMCPMC238157.
- 989 39. Pari GS. Nuts and bolts of human cytomegalovirus lytic DNA replication. *Curr Top Microbiol*  
990 *Immunol.* 2008;325:153-66. PubMed PMID: 18637505.
- 991 40. Boehm T, Hofer S, Winklehner P, Kellersch B, Geiger C, Trockenbacher A, et al. Attenuation  
992 of cell adhesion in lymphocytes is regulated by CYTIP, a protein which mediates signal complex  
993 sequestration. *EMBO J.* 2003;22(5):1014-24. doi: 10.1093/emboj/cdg101. PubMed PMID: 12606567;  
994 PubMed Central PMCID: PMCPMC150334.
- 995 41. Ranheim EA, Kipps TJ. Activated T cells induce expression of B7/BB1 on normal or leukemic  
996 B cells through a CD40-dependent signal. *J Exp Med.* 1993;177(4):925-35. PubMed PMID: 7681471;  
997 PubMed Central PMCID: PMCPMC2190967.
- 998 42. Cell Ranger. [https://support.10xgenomics.com/single-cell-gene-](https://support.10xgenomics.com/single-cell-gene-expression/software/pipelines/latest/what-is-cell-ranger)  
999 [expression/software/pipelines/latest/what-is-cell-ranger](https://support.10xgenomics.com/single-cell-gene-expression/software/pipelines/latest/what-is-cell-ranger). 2018.
- 1000 43. Rapin N, Bagger FO, Jendholm J, Mora-Jensen H, Krogh A, Kohlmann A, et al. Comparing  
1001 cancer vs normal gene expression profiles identifies new disease entities and common transcriptional  
1002 programs in AML patients. *Blood.* 2014;123(6):894-904. doi: 10.1182/blood-2013-02-485771.  
1003 PubMed PMID: 24363398.
- 1004 44. Mabbott NA, Baillie JK, Brown H, Freeman TC, Hume DA. An expression atlas of human  
1005 primary cells: inference of gene function from coexpression networks. *BMC Genomics.* 2013;14:632.

- 1006 doi: 10.1186/1471-2164-14-632. PubMed PMID: 24053356; PubMed Central PMCID:  
1007 PMCPMC3849585.
- 1008 45. Tardif MR, Chapeton-Montes JA, Posvandzic A, Page N, Gilbert C, Tessier PA. Secretion of  
1009 S100A8, S100A9, and S100A12 by Neutrophils Involves Reactive Oxygen Species and Potassium  
1010 Efflux. *J Immunol Res.* 2015;2015:296149. doi: 10.1155/2015/296149. PubMed PMID: 27057553;  
1011 PubMed Central PMCID: PMCPMC4736198.
- 1012 46. Bostrom EA, Tarkowski A, Bokarewa M. Resistin is stored in neutrophil granules being  
1013 released upon challenge with inflammatory stimuli. *Biochim Biophys Acta.* 2009;1793(12):1894-900.  
1014 doi: 10.1016/j.bbamcr.2009.09.008. PubMed PMID: 19770005.
- 1015 47. Karamitros D, Stoilova B, Aboukhalil Z, Hamey F, Reinisch A, Samitsch M, et al. Single-cell  
1016 analysis reveals the continuum of human lympho-myeloid progenitor cells. *Nat Immunol.*  
1017 2018;19(1):85-97. doi: 10.1038/s41590-017-0001-2. PubMed PMID: 29167569; PubMed Central  
1018 PMCID: PMCPMC5884424.
- 1019 48. Velten L, Haas SF, Raffel S, Blaszkiewicz S, Islam S, Hennig BP, et al. Human haematopoietic  
1020 stem cell lineage commitment is a continuous process. *Nat Cell Biol.* 2017;19(4):271-81. doi:  
1021 10.1038/ncb3493. PubMed PMID: 28319093; PubMed Central PMCID: PMCPMC5496982.
- 1022 49. Laurenti E, Gottgens B. From haematopoietic stem cells to complex differentiation landscapes.  
1023 *Nature.* 2018;553(7689):418-26. doi: 10.1038/nature25022. PubMed PMID: 29364285.
- 1024 50. Cabezas-Wallscheid N, Klimmeck D, Hansson J, Lipka DB, Reyes A, Wang Q, et al.  
1025 Identification of regulatory networks in HSCs and their immediate progeny via integrated proteome,  
1026 transcriptome, and DNA methylome analysis. *Cell Stem Cell.* 2014;15(4):507-22. doi:  
1027 10.1016/j.stem.2014.07.005. PubMed PMID: 25158935.
- 1028 51. Trapnell C, Cacchiarelli D, Grimsby J, Pokharel P, Li S, Morse M, et al. The dynamics and  
1029 regulators of cell fate decisions are revealed by pseudotemporal ordering of single cells. *Nat*  
1030 *Biotechnol.* 2014;32(4):381-6. doi: 10.1038/nbt.2859. PubMed PMID: 24658644; PubMed Central  
1031 PMCID: PMCPMC4122333.
- 1032 52. Butler A, Hoffman P, Smibert P, Papalexi E, Satija R. Integrating single-cell transcriptomic  
1033 data across different conditions, technologies, and species. *Nat Biotechnol.* 2018;36(5):411-20. doi:  
1034 10.1038/nbt.4096. PubMed PMID: 29608179.
- 1035 53. Hertel L, Mocarski ES. Global analysis of host cell gene expression late during  
1036 cytomegalovirus infection reveals extensive dysregulation of cell cycle gene expression and induction  
1037 of Pseudomitosis independent of US28 function. *J Virol.* 2004;78(21):11988-2011. PubMed PMID:  
1038 15479839.
- 1039 54. Bresnahan WA, Boldogh I, Thompson EA, Albrecht T. Human cytomegalovirus inhibits  
1040 cellular DNA synthesis and arrests productively infected cells in late G1. *Virology.* 1996;224(1):150-  
1041 60. PubMed PMID: 8862409.
- 1042 55. Dittmer D, Mocarski ES. Human cytomegalovirus infection inhibits G1/S transition. *J Virol.*  
1043 1997;71(2):1629-34. PubMed PMID: 8995690.
- 1044 56. Lu M, Shenk T. Human cytomegalovirus infection inhibits cell cycle progression at multiple  
1045 points, including the transition from G1 to S. *J Virol.* 1996;70(12):8850-7. PubMed PMID: 8971013.
- 1046 57. Asai T, Liu Y, Di Giandomenico S, Bae N, Ndiaye-Lobry D, Deblasio A, et al. Necdin, a p53  
1047 target gene, regulates the quiescence and response to genotoxic stress of hematopoietic stem/progenitor  
1048 cells. *Blood.* 2012;120(8):1601-12. doi: 10.1182/blood-2011-11-393983. PubMed PMID: 22776820;  
1049 PubMed Central PMCID: PMCPMC3429304.
- 1050 58. Hertel L, Chou S, Mocarski ES. Viral and cell cycle-regulated kinases in cytomegalovirus-  
1051 induced pseudomitosis and replication. *PLoS Pathog.* 2007;3(1):e6. PubMed PMID: 17206862.

- 1052 59. Kabir MA, Uddin W, Narayanan A, Reddy PK, Jairajpuri MA, Sherman F, et al. Functional  
1053 Subunits of Eukaryotic Chaperonin CCT/TRiC in Protein Folding. *J Amino Acids*. 2011;2011:843206.  
1054 doi: 10.4061/2011/843206. PubMed PMID: 22312474; PubMed Central PMCID: PMCPMC3268035.
- 1055 60. Meunier L, Usherwood YK, Chung KT, Hendershot LM. A subset of chaperones and folding  
1056 enzymes form multiprotein complexes in endoplasmic reticulum to bind nascent proteins. *Mol Biol*  
1057 *Cell*. 2002;13(12):4456-69. doi: 10.1091/mbc.e02-05-0311. PubMed PMID: 12475965; PubMed  
1058 Central PMCID: PMCPMC138646.
- 1059 61. Williams DB. Beyond lectins: the calnexin/calreticulin chaperone system of the endoplasmic  
1060 reticulum. *J Cell Sci*. 2006;119(Pt 4):615-23. doi: 10.1242/jcs.02856. PubMed PMID: 16467570.
- 1061 62. Khan S, Zimmermann A, Basler M, Groettrup M, Hengel H. A cytomegalovirus inhibitor of  
1062 gamma interferon signaling controls immunoproteasome induction. *J Virol*. 2004;78(4):1831-42.  
1063 PubMed PMID: 14747547; PubMed Central PMCID: PMCPMC369451.
- 1064 63. Tuli A, Sharma M, McIlhaney MM, Talmadge JE, Naslavsky N, Caplan S, et al. Amyloid  
1065 precursor-like protein 2 increases the endocytosis, instability, and turnover of the H2-K(d) MHC class I  
1066 molecule. *J Immunol*. 2008;181(3):1978-87. PubMed PMID: 18641335; PubMed Central PMCID:  
1067 PMCPMC2607064.
- 1068 64. Tuli A, Sharma M, Naslavsky N, Caplan S, Solheim JC. Specificity of amyloid precursor-like  
1069 protein 2 interactions with MHC class I molecules. *Immunogenetics*. 2008;60(6):303-13. doi:  
1070 10.1007/s00251-008-0296-0. PubMed PMID: 18452037; PubMed Central PMCID:  
1071 PMCPMC2683759.
- 1072 65. ten Broeke T, Wubbolts R, Stoorvogel W. MHC class II antigen presentation by dendritic cells  
1073 regulated through endosomal sorting. *Cold Spring Harb Perspect Biol*. 2013;5(12):a016873. doi:  
1074 10.1101/cshperspect.a016873. PubMed PMID: 24296169; PubMed Central PMCID:  
1075 PMCPMC3839614.
- 1076 66. Unterholzner L, Keating SE, Baran M, Horan KA, Jensen SB, Sharma S, et al. IFI16 is an  
1077 innate immune sensor for intracellular DNA. *Nat Immunol*. 2010;11(11):997-1004. doi:  
1078 10.1038/ni.1932. PubMed PMID: 20890285; PubMed Central PMCID: PMCPMC3142795.
- 1079 67. Yanai H, Ban T, Wang Z, Choi MK, Kawamura T, Negishi H, et al. HMGB proteins function  
1080 as universal sentinels for nucleic-acid-mediated innate immune responses. *Nature*. 2009;462(7269):99-  
1081 103. doi: 10.1038/nature08512. PubMed PMID: 19890330.
- 1082 68. Pichlmair A, Schulz O, Tan CP, Naslund TI, Liljestrom P, Weber F, et al. RIG-I-mediated  
1083 antiviral responses to single-stranded RNA bearing 5'-phosphates. *Science*. 2006;314(5801):997-1001.  
1084 doi: 10.1126/science.1132998. PubMed PMID: 17038589.
- 1085 69. Kato H, Takeuchi O, Sato S, Yoneyama M, Yamamoto M, Matsui K, et al. Differential roles of  
1086 MDA5 and RIG-I helicases in the recognition of RNA viruses. *Nature*. 2006;441(7089):101-5. doi:  
1087 10.1038/nature04734. PubMed PMID: 16625202.
- 1088 70. Meurs E, Chong K, Galabru J, Thomas NS, Kerr IM, Williams BR, et al. Molecular cloning and  
1089 characterization of the human double-stranded RNA-activated protein kinase induced by interferon.  
1090 *Cell*. 1990;62(2):379-90. PubMed PMID: 1695551.
- 1091 71. Zhao GN, Jiang DS, Li H. Interferon regulatory factors: at the crossroads of immunity,  
1092 metabolism, and disease. *Biochim Biophys Acta*. 2015;1852(2):365-78. doi:  
1093 10.1016/j.bbadis.2014.04.030. PubMed PMID: 24807060.
- 1094 72. Negishi H, Ohba Y, Yanai H, Takaoka A, Honma K, Yui K, et al. Negative regulation of Toll-  
1095 like-receptor signaling by IRF-4. *Proc Natl Acad Sci U S A*. 2005;102(44):15989-94. doi:  
1096 10.1073/pnas.0508327102. PubMed PMID: 16236719; PubMed Central PMCID: PMCPMC1257749.

- 1097 73. Harada H, Fujita T, Miyamoto M, Kimura Y, Maruyama M, Furia A, et al. Structurally similar  
1098 but functionally distinct factors, IRF-1 and IRF-2, bind to the same regulatory elements of IFN and  
1099 IFN-inducible genes. *Cell*. 1989;58(4):729-39. PubMed PMID: 2475256.
- 1100 74. Sanada T, Takaesu G, Mashima R, Yoshida R, Kobayashi T, Yoshimura A. FLN29 deficiency  
1101 reveals its negative regulatory role in the Toll-like receptor (TLR) and retinoic acid-inducible gene I  
1102 (RIG-I)-like helicase signaling pathway. *J Biol Chem*. 2008;283(49):33858-64. doi:  
1103 10.1074/jbc.M806923200. PubMed PMID: 18849341; PubMed Central PMCID: PMCPMC2662213.
- 1104 75. Yoshimura A, Ito M, Chikuma S, Akanuma T, Nakatsukasa H. Negative Regulation of  
1105 Cytokine Signaling in Immunity. *Cold Spring Harb Perspect Biol*. 2018;10(7). doi:  
1106 10.1101/cshperspect.a028571. PubMed PMID: 28716890.
- 1107 76. Vladimer GI, Gorna MW, Superti-Furga G. IFITs: Emerging Roles as Key Anti-Viral Proteins.  
1108 *Front Immunol*. 2014;5:94. doi: 10.3389/fimmu.2014.00094. PubMed PMID: 24653722; PubMed  
1109 Central PMCID: PMCPMC3948006.
- 1110 77. Shi G, Schwartz O, Compton AA. More than meets the I: the diverse antiviral and cellular  
1111 functions of interferon-induced transmembrane proteins. *Retrovirology*. 2017;14(1):53. doi:  
1112 10.1186/s12977-017-0377-y. PubMed PMID: 29162141; PubMed Central PMCID:  
1113 PMCPMC5697417.
- 1114 78. Perng YC, Lenschow DJ. ISG15 in antiviral immunity and beyond. *Nat Rev Microbiol*.  
1115 2018;16(7):423-39. doi: 10.1038/s41579-018-0020-5. PubMed PMID: 29769653.
- 1116 79. Haller O, Staeheli P, Schwemmler M, Kochs G. Mx GTPases: dynamin-like antiviral machines  
1117 of innate immunity. *Trends Microbiol*. 2015;23(3):154-63. doi: 10.1016/j.tim.2014.12.003. PubMed  
1118 PMID: 25572883.
- 1119 80. Hovanessian AG, Justesen J. The human 2'-5'oligoadenylate synthetase family: unique  
1120 interferon-inducible enzymes catalyzing 2'-5' instead of 3'-5' phosphodiester bond formation.  
1121 *Biochimie*. 2007;89(6-7):779-88. doi: 10.1016/j.biochi.2007.02.003. PubMed PMID: 17408844.
- 1122 81. Helbig KJ, Beard MR. The role of viperin in the innate antiviral response. *J Mol Biol*.  
1123 2014;426(6):1210-9. doi: 10.1016/j.jmb.2013.10.019. PubMed PMID: 24157441.
- 1124 82. Li M, Zhang D, Zhu M, Shen Y, Wei W, Ying S, et al. Roles of SAMHD1 in antiviral defense,  
1125 autoimmunity and cancer. *Rev Med Virol*. 2017;27(4). doi: 10.1002/rmv.1931. PubMed PMID:  
1126 28444859.
- 1127 83. Zheng Z, Wang L, Pan J. Interferon-stimulated gene 20-kDa protein (ISG20) in infection and  
1128 disease: Review and outlook. *Intractable Rare Dis Res*. 2017;6(1):35-40. doi: 10.5582/irdr.2017.01004.  
1129 PubMed PMID: 28357179; PubMed Central PMCID: PMCPMC5359350.
- 1130 84. Ishikawa H, Barber GN. STING is an endoplasmic reticulum adaptor that facilitates innate  
1131 immune signalling. *Nature*. 2008;455(7213):674-8. doi: 10.1038/nature07317. PubMed PMID:  
1132 18724357; PubMed Central PMCID: PMCPMC2804933.
- 1133 85. Ishikawa H, Ma Z, Barber GN. STING regulates intracellular DNA-mediated, type I interferon-  
1134 dependent innate immunity. *Nature*. 2009;461(7265):788-92. doi: 10.1038/nature08476. PubMed  
1135 PMID: 19776740; PubMed Central PMCID: PMCPMC4664154.
- 1136 86. Tanaka Y, Chen ZJ. STING specifies IRF3 phosphorylation by TBK1 in the cytosolic DNA  
1137 signaling pathway. *Sci Signal*. 2012;5(214):ra20. doi: 10.1126/scisignal.2002521. PubMed PMID:  
1138 22394562; PubMed Central PMCID: PMCPMC3549669.
- 1139 87. Zhong B, Yang Y, Li S, Wang YY, Li Y, Diao F, et al. The adaptor protein MITA links virus-  
1140 sensing receptors to IRF3 transcription factor activation. *Immunity*. 2008;29(4):538-50. doi:  
1141 10.1016/j.immuni.2008.09.003. PubMed PMID: 18818105.

- 1142 88. Outlioua A, Pourcelot M, Arnoult D. The Role of Optineurin in Antiviral Type I Interferon  
1143 Production. *Front Immunol.* 2018;9:853. doi: 10.3389/fimmu.2018.00853. PubMed PMID: 29755463;  
1144 PubMed Central PMCID: PMC5932347.
- 1145 89. Pajjo J, Doring M, Spanier J, Grabski E, Nooruzzaman M, Schmidt T, et al. cGAS Senses  
1146 Human Cytomegalovirus and Induces Type I Interferon Responses in Human Monocyte-Derived Cells.  
1147 *PLoS Pathog.* 2016;12(4):e1005546. doi: 10.1371/journal.ppat.1005546. PubMed PMID: 27058035;  
1148 PubMed Central PMCID: PMC4825940.
- 1149 90. Shnayder M, Nachshon A, Krishna B, Poole E, Boshkov A, Binyamin A, et al. Defining the  
1150 Transcriptional Landscape during Cytomegalovirus Latency with Single-Cell RNA Sequencing. *MBio.*  
1151 2018;9(2). doi: 10.1128/mBio.00013-18. PubMed PMID: 29535194; PubMed Central PMCID:  
1152 PMC5850328.
- 1153 91. Waddington CH. The strategy of the genes: a discussion of some aspects of theoretical biology:  
1154 Allen & Unwin; 1957.
- 1155 92. Povinelli BJ, Rodriguez-Meira A, Mead AJ. Single cell analysis of normal and leukemic  
1156 hematopoiesis. *Mol Aspects Med.* 2018;59:85-94. doi: 10.1016/j.mam.2017.08.006. PubMed PMID:  
1157 28863981; PubMed Central PMCID: PMC5771467.
- 1158 93. Buenrostro JD, Corces MR, Lareau CA, Wu B, Schep AN, Aryee MJ, et al. Integrated Single-  
1159 Cell Analysis Maps the Continuous Regulatory Landscape of Human Hematopoietic Differentiation.  
1160 *Cell.* 2018;173(6):1535-48 e16. doi: 10.1016/j.cell.2018.03.074. PubMed PMID: 29706549; PubMed  
1161 Central PMCID: PMC5989727.
- 1162 94. Piacibello W, Sanavio F, Garetto L, Severino A, Bergandi D, Ferrario J, et al. Extensive  
1163 amplification and self-renewal of human primitive hematopoietic stem cells from cord blood. *Blood.*  
1164 1997;89(8):2644-53. Epub 1997/04/15. PubMed PMID: 9108381.
- 1165 95. Tanavde VM, Malehorn MT, Lumkul R, Gao Z, Wingard J, Garrett ES, et al. Human stem-  
1166 progenitor cells from neonatal cord blood have greater hematopoietic expansion capacity than those  
1167 from mobilized adult blood. *Exp Hematol.* 2002;30(7):816-23. PubMed PMID: 12135681.
- 1168 96. Gilmore GL, DePasquale DK, Lister J, Shaddock RK. Ex vivo expansion of human umbilical  
1169 cord blood and peripheral blood CD34(+) hematopoietic stem cells. *Exp Hematol.* 2000;28(11):1297-  
1170 305. PubMed PMID: 11063878.
- 1171 97. Psatha N, Karponi G, Yannaki E. Optimizing autologous cell grafts to improve stem cell gene  
1172 therapy. *Exp Hematol.* 2016;44(7):528-39. doi: 10.1016/j.exphem.2016.04.007. PubMed PMID:  
1173 27106799; PubMed Central PMCID: PMC4914411.
- 1174 98. Flores-Guzman P, Fernandez-Sanchez V, Mayani H. Concise review: ex vivo expansion of cord  
1175 blood-derived hematopoietic stem and progenitor cells: basic principles, experimental approaches, and  
1176 impact in regenerative medicine. *Stem Cells Transl Med.* 2013;2(11):830-8. doi: 10.5966/sctm.2013-  
1177 0071. PubMed PMID: 24101670; PubMed Central PMCID: PMC3808198.
- 1178 99. Machlus KR, Italiano JE, Jr. The incredible journey: From megakaryocyte development to  
1179 platelet formation. *J Cell Biol.* 2013;201(6):785-96. doi: 10.1083/jcb.201304054. PubMed PMID:  
1180 23751492; PubMed Central PMCID: PMC3678154.
- 1181 100. Tsapogas P, Mooney CJ, Brown G, Rolink A. The Cytokine Flt3-Ligand in Normal and  
1182 Malignant Hematopoiesis. *Int J Mol Sci.* 2017;18(6). doi: 10.3390/ijms18061115. PubMed PMID:  
1183 28538663; PubMed Central PMCID: PMC5485939.
- 1184 101. Munger J, Bajad SU, Coller HA, Shenk T, Rabinowitz JD. Dynamics of the cellular  
1185 metabolome during human cytomegalovirus infection. *PLoS Pathog.* 2006;2(12):e132. doi:  
1186 10.1371/journal.ppat.0020132. PubMed PMID: 17173481; PubMed Central PMCID:  
1187 PMC1698944.

- 1188 102. Kaarbo M, Ager-Wick E, Osenbroch PO, Kilander A, Skinnes R, Muller F, et al. Human  
1189 cytomegalovirus infection increases mitochondrial biogenesis. *Mitochondrion*. 2011;11(6):935-45. doi:  
1190 10.1016/j.mito.2011.08.008. PubMed PMID: 21907833.
- 1191 103. Jean Beltran PM, Mathias RA, Cristea IM. A Portrait of the Human Organelle Proteome In  
1192 Space and Time during Cytomegalovirus Infection. *Cell Syst*. 2016;3(4):361-73 e6. doi:  
1193 10.1016/j.cels.2016.08.012. PubMed PMID: 27641956; PubMed Central PMCID: PMC5083158.
- 1194 104. Karniely S, Weekes MP, Antrobus R, Rorbach J, van Haute L, Umrانيا Y, et al. Human  
1195 Cytomegalovirus Infection Upregulates the Mitochondrial Transcription and Translation Machineries.  
1196 *MBio*. 2016;7(2):e00029. doi: 10.1128/mBio.00029-16. PubMed PMID: 27025248; PubMed Central  
1197 PMCID: PMC5083158.
- 1198 105. Spector DH. Human cytomegalovirus riding the cell cycle. *Med Microbiol Immunol*.  
1199 2015;204(3):409-19. doi: 10.1007/s00430-015-0396-z. PubMed PMID: 25776080.
- 1200 106. Eifler M, Uecker R, Weisbach H, Bogdanow B, Richter E, Konig L, et al. PUL21a-Cyclin A2  
1201 interaction is required to protect human cytomegalovirus-infected cells from the deleterious  
1202 consequences of mitotic entry. *PLoS Pathog*. 2014;10(10):e1004514. doi:  
1203 10.1371/journal.ppat.1004514. PubMed PMID: 25393019; PubMed Central PMCID:  
1204 PMC4231158.
- 1205 107. Tirosh O, Cohen Y, Shitrit A, Shani O, Le-Trilling VT, Trilling M, et al. The Transcription and  
1206 Translation Landscapes during Human Cytomegalovirus Infection Reveal Novel Host-Pathogen  
1207 Interactions. *PLoS Pathog*. 2015;11(11):e1005288. doi: 10.1371/journal.ppat.1005288. PubMed PMID:  
1208 26599541; PubMed Central PMCID: PMC4658056.
- 1209 108. Palpant NJ, Wang Y, Hadland B, Zaunbrecher RJ, Redd M, Jones D, et al. Chromatin and  
1210 Transcriptional Analysis of Mesoderm Progenitor Cells Identifies HOPX as a Regulator of Primitive  
1211 Hematopoiesis. *Cell Rep*. 2017;20(7):1597-608. doi: 10.1016/j.celrep.2017.07.067. PubMed PMID:  
1212 28813672; PubMed Central PMCID: PMC5576510.
- 1213 109. Ling F, Kang B, Sun XH. Id proteins: small molecules, mighty regulators. *Curr Top Dev Biol*.  
1214 2014;110:189-216. doi: 10.1016/B978-0-12-405943-6.00005-1. PubMed PMID: 25248477.
- 1215 110. Lotem J, Levanon D, Negreanu V, Bauer O, Hantisteanu S, Dicken J, et al. Runx3 in Immunity,  
1216 Inflammation and Cancer. *Adv Exp Med Biol*. 2017;962:369-93. doi: 10.1007/978-981-10-3233-2\_23.  
1217 PubMed PMID: 28299669.
- 1218 111. Marke R, van Leeuwen FN, Scheijen B. The many faces of IKZF1 in B-cell precursor acute  
1219 lymphoblastic leukemia. *Haematologica*. 2018;103(4):565-74. doi: 10.3324/haematol.2017.185603.  
1220 PubMed PMID: 29519871; PubMed Central PMCID: PMC5865415.
- 1221 112. Burda P, Laslo P, Stopka T. The role of PU.1 and GATA-1 transcription factors during normal  
1222 and leukemogenic hematopoiesis. *Leukemia*. 2010;24(7):1249-57. doi: 10.1038/leu.2010.104. PubMed  
1223 PMID: 20520638.
- 1224 113. Abate DA, Watanabe S, Mocarski ES. Major human cytomegalovirus structural protein pp65  
1225 (ppUL83) prevents interferon response factor 3 activation in the interferon response. *J Virol*.  
1226 2004;78(20):10995-1006. PubMed PMID: 15452220.
- 1227 114. Browne EP, Wing B, Coleman D, Shenk T. Altered cellular mRNA levels in human  
1228 cytomegalovirus-infected fibroblasts: viral block to the accumulation of antiviral mRNAs. *J Virol*.  
1229 2001;75(24):12319-30. PubMed PMID: 11711622.
- 1230 115. Slobedman B, Stern JL, Cunningham AL, Abendroth A, Abate DA, Mocarski ES. Impact of  
1231 human cytomegalovirus latent infection on myeloid progenitor cell gene expression. *J Virol*.  
1232 2004;78(8):4054-62. PubMed PMID: 15047822.

- 1233 116. Chan G, Bivins-Smith ER, Smith MS, Smith PM, Yurochko AD. Transcriptome analysis  
1234 reveals human cytomegalovirus reprograms monocyte differentiation toward an M1 macrophage. *J*  
1235 *Immunol.* 2008;181(1):698-711. PubMed PMID: 18566437.
- 1236 117. Mezger M, Bonin M, Kessler T, Gebhardt F, Einsele H, Loeffler J. Toll-like receptor 3 has no  
1237 critical role during early immune response of human monocyte-derived dendritic cells after infection  
1238 with the human cytomegalovirus strain TB40E. *Viral Immunol.* 2009;22(6):343-51. doi:  
1239 10.1089/vim.2009.0011. PubMed PMID: 19951172.
- 1240 118. Zhu H, Cong JP, Shenk T. Use of differential display analysis to assess the effect of human  
1241 cytomegalovirus infection on the accumulation of cellular RNAs: induction of interferon-responsive  
1242 RNAs. *Proc Natl Acad Sci U S A.* 1997;94(25):13985-90. PubMed PMID: 9391139.
- 1243 119. Boyle KA, Pietropaolo RL, Compton T. Engagement of the cellular receptor for glycoprotein B  
1244 of human cytomegalovirus activates the interferon-responsive pathway. *Mol Cell Biol.*  
1245 1999;19(5):3607-13. PubMed PMID: 10207084; PubMed Central PMCID: PMCPMC84158.
- 1246 120. Yurochko AD, Huang ES. Human cytomegalovirus binding to human monocytes induces  
1247 immunoregulatory gene expression. *J Immunol.* 1999;162(8):4806-16. PubMed PMID: 10202024.
- 1248 121. Preston CM, Harman AN, Nicholl MJ. Activation of interferon response factor-3 in human cells  
1249 infected with herpes simplex virus type 1 or human cytomegalovirus. *J Virol.* 2001;75(19):8909-16.  
1250 doi: 10.1128/JVI.75.19.8909-8916.2001. PubMed PMID: 11533154; PubMed Central PMCID:  
1251 PMCPMC114459.
- 1252 122. Netterwald JR, Jones TR, Britt WJ, Yang SJ, McCrone IP, Zhu H. Postattachment events  
1253 associated with viral entry are necessary for induction of interferon-stimulated genes by human  
1254 cytomegalovirus. *J Virol.* 2004;78(12):6688-91. doi: 10.1128/JVI.78.12.6688-6691.2004. PubMed  
1255 PMID: 15163760; PubMed Central PMCID: PMCPMC416537.
- 1256 123. Taylor RT, Bresnahan WA. Human cytomegalovirus immediate-early 2 protein IE86 blocks  
1257 virus-induced chemokine expression. *J Virol.* 2006;80(2):920-8. doi: 10.1128/JVI.80.2.920-928.2006.  
1258 PubMed PMID: 16378994; PubMed Central PMCID: PMCPMC1346867.
- 1259 124. Fu YZ, Su S, Gao YQ, Wang PP, Huang ZF, Hu MM, et al. Human Cytomegalovirus  
1260 Tegument Protein UL82 Inhibits STING-Mediated Signaling to Evade Antiviral Immunity. *Cell Host*  
1261 *Microbe.* 2017;21(2):231-43. doi: 10.1016/j.chom.2017.01.001. PubMed PMID: 28132838.
- 1262 125. Khan N, Bruton R, Taylor GS, Cobbold M, Jones TR, Rickinson AB, et al. Identification of  
1263 cytomegalovirus-specific cytotoxic T lymphocytes in vitro is greatly enhanced by the use of  
1264 recombinant virus lacking the US2 to US11 region or modified vaccinia virus Ankara expressing  
1265 individual viral genes. *J Virol.* 2005;79(5):2869-79. PubMed PMID: 15709006.
- 1266 126. Taylor RT, Bresnahan WA. Human cytomegalovirus IE86 attenuates virus- and tumor necrosis  
1267 factor alpha-induced NFkappaB-dependent gene expression. *J Virol.* 2006;80(21):10763-71. PubMed  
1268 PMID: 17041226.
- 1269 127. Miller DM, Zhang Y, Rahill BM, Waldman WJ, Sedmak DD. Human cytomegalovirus inhibits  
1270 IFN-alpha-stimulated antiviral and immunoregulatory responses by blocking multiple levels of IFN-  
1271 alpha signal transduction. *J Immunol.* 1999;162(10):6107-13. PubMed PMID: 10229853.
- 1272 128. Le VT, Trilling M, Wilborn M, Hengel H, Zimmermann A. Human cytomegalovirus interferes  
1273 with signal transducer and activator of transcription (STAT) 2 protein stability and tyrosine  
1274 phosphorylation. *J Gen Virol.* 2008;89(Pt 10):2416-26. doi: 10.1099/vir.0.2008/001669-0. PubMed  
1275 PMID: 18796709.
- 1276 129. Biolatti M, Dell'Oste V, Pautasso S, Gugliesi F, von Einem J, Krapp C, et al. Human  
1277 Cytomegalovirus Tegument Protein pp65 (pUL83) Dampens Type I Interferon Production by  
1278 Inactivating the DNA Sensor cGAS without Affecting STING. *J Virol.* 2018;92(6). doi:  
1279 10.1128/JVI.01774-17. PubMed PMID: 29263269; PubMed Central PMCID: PMCPMC5827387.



- 1280 130. Marshall EE, Geballe AP. Multifaceted evasion of the interferon response by cytomegalovirus.  
1281 J Interferon Cytokine Res. 2009;29(9):609-19. Epub 2009/08/28. doi: 10.1089/jir.2009.0064. PubMed  
1282 PMID: 19708810; PubMed Central PMCID: PMC2743745.
- 1283 131. Verma S, Benedict CA. Sources and signals regulating type I interferon production: lessons  
1284 learned from cytomegalovirus. J Interferon Cytokine Res. 2011;31(2):211-8. doi:  
1285 10.1089/jir.2010.0118. PubMed PMID: 21226618; PubMed Central PMCID: PMCPMC3036178.
- 1286 132. Goodwin CM, Ciesla JH, Munger J. Who's Driving? Human Cytomegalovirus, Interferon, and  
1287 NFkappaB Signaling. Viruses. 2018;10(9). doi: 10.3390/v10090447. PubMed PMID: 30134546.
- 1288 133. van Boxel-Dezaire AH, Rani MR, Stark GR. Complex modulation of cell type-specific  
1289 signaling in response to type I interferons. Immunity. 2006;25(3):361-72. doi:  
1290 10.1016/j.immuni.2006.08.014. PubMed PMID: 16979568.
- 1291 134. Daffis S, Suthar MS, Szretter KJ, Gale M, Jr., Diamond MS. Induction of IFN-beta and the  
1292 innate antiviral response in myeloid cells occurs through an IPS-1-dependent signal that does not  
1293 require IRF-3 and IRF-7. PLoS Pathog. 2009;5(10):e1000607. doi: 10.1371/journal.ppat.1000607.  
1294 PubMed PMID: 19798431; PubMed Central PMCID: PMCPMC2747008.
- 1295 135. Browne EP, Shenk T. Human cytomegalovirus UL83-coded pp65 virion protein inhibits  
1296 antiviral gene expression in infected cells. Proc Natl Acad Sci U S A. 2003;100(20):11439-44. PubMed  
1297 PMID: 12972646.
- 1298 136. Jahn G, Scholl BC, Traupe B, Fleckenstein B. The two major structural phosphoproteins (pp65  
1299 and pp150) of human cytomegalovirus and their antigenic properties. J Gen Virol. 1987;68 ( Pt  
1300 5):1327-37. doi: 10.1099/0022-1317-68-5-1327. PubMed PMID: 3033138.
- 1301 137. Dobin A, Davis CA, Schlesinger F, Drenkow J, Zaleski C, Jha S, et al. STAR: ultrafast  
1302 universal RNA-seq aligner. Bioinformatics. 2013;29(1):15-21. doi: 10.1093/bioinformatics/bts635.  
1303 PubMed PMID: 23104886; PubMed Central PMCID: PMCPMC3530905.
- 1304

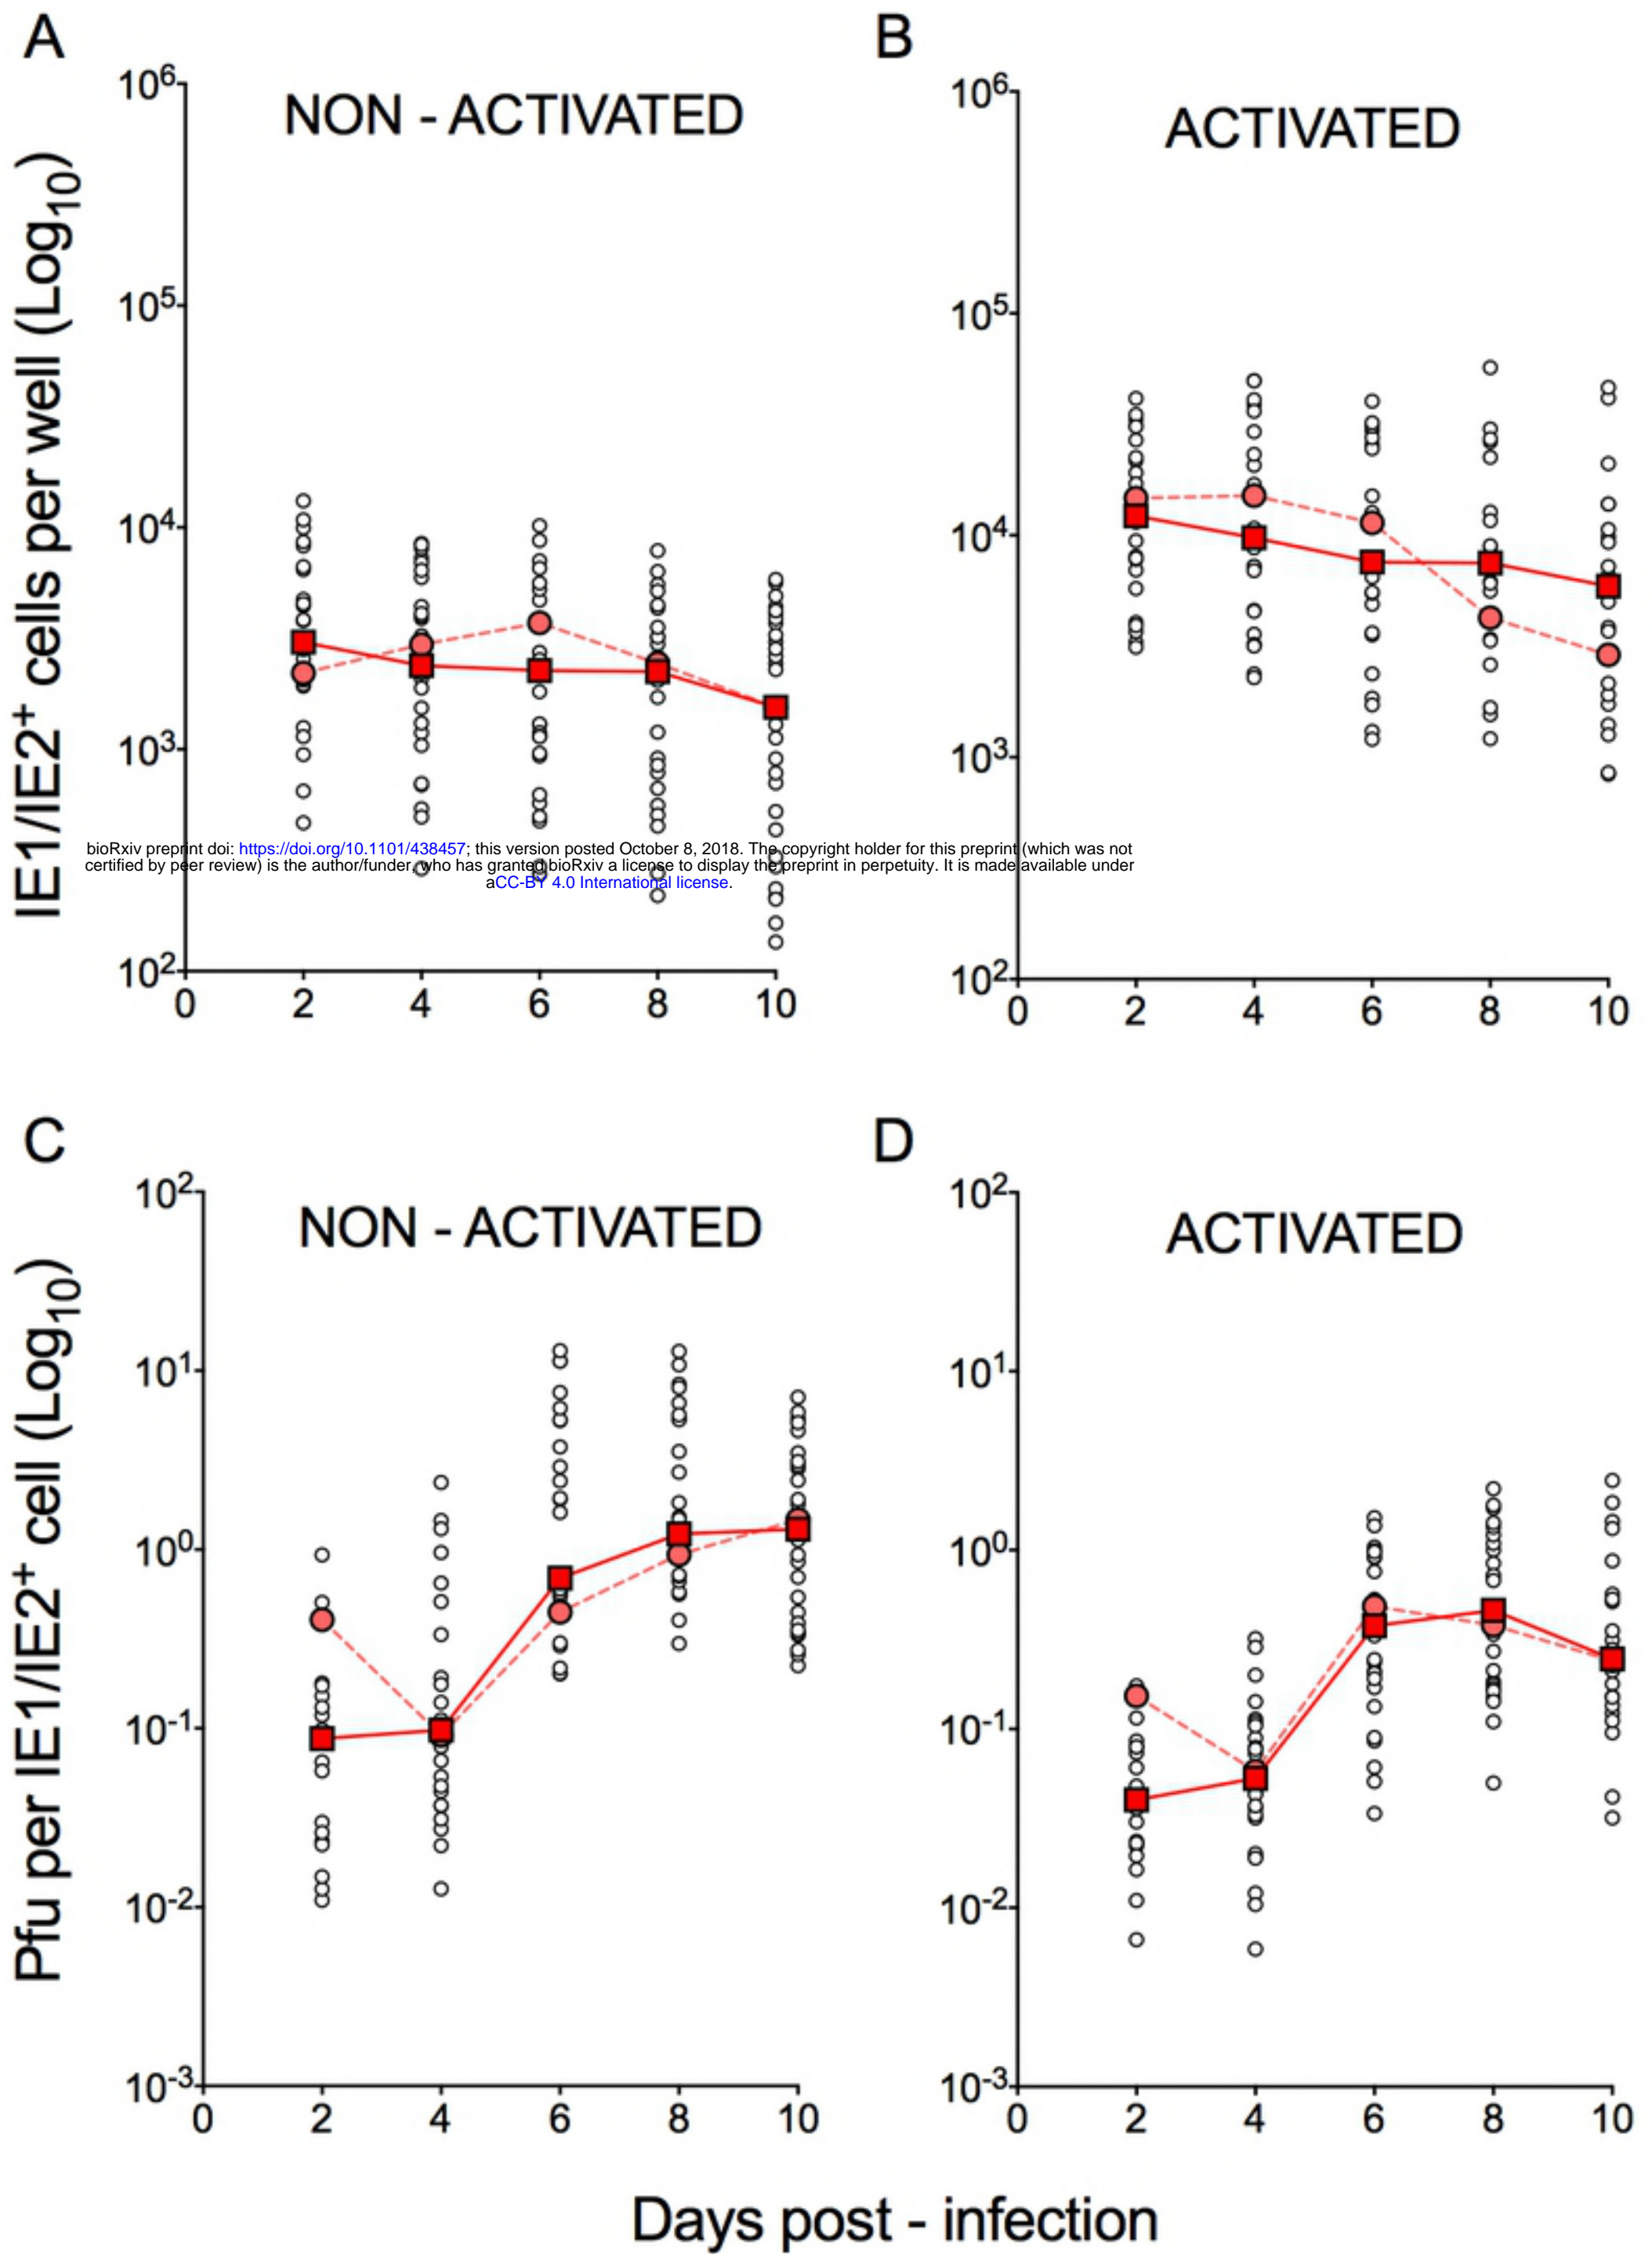

Figure 1

A

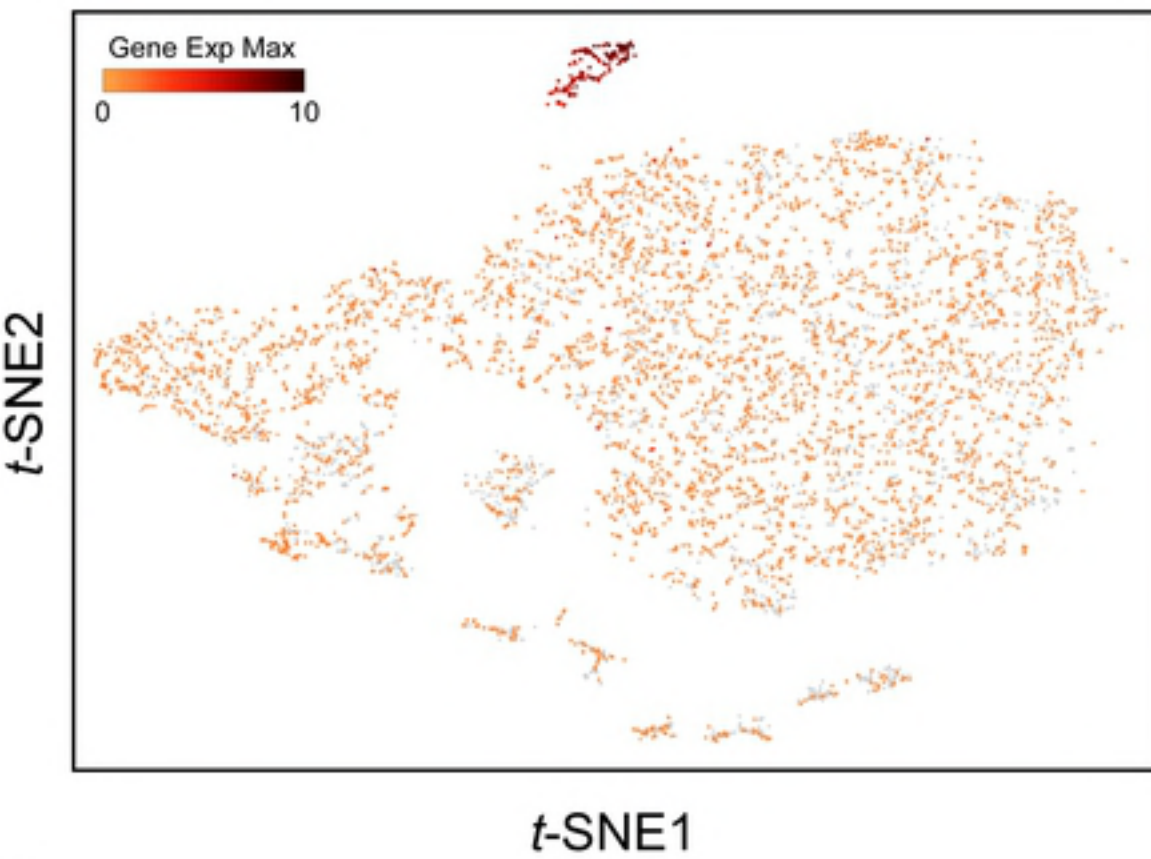

B

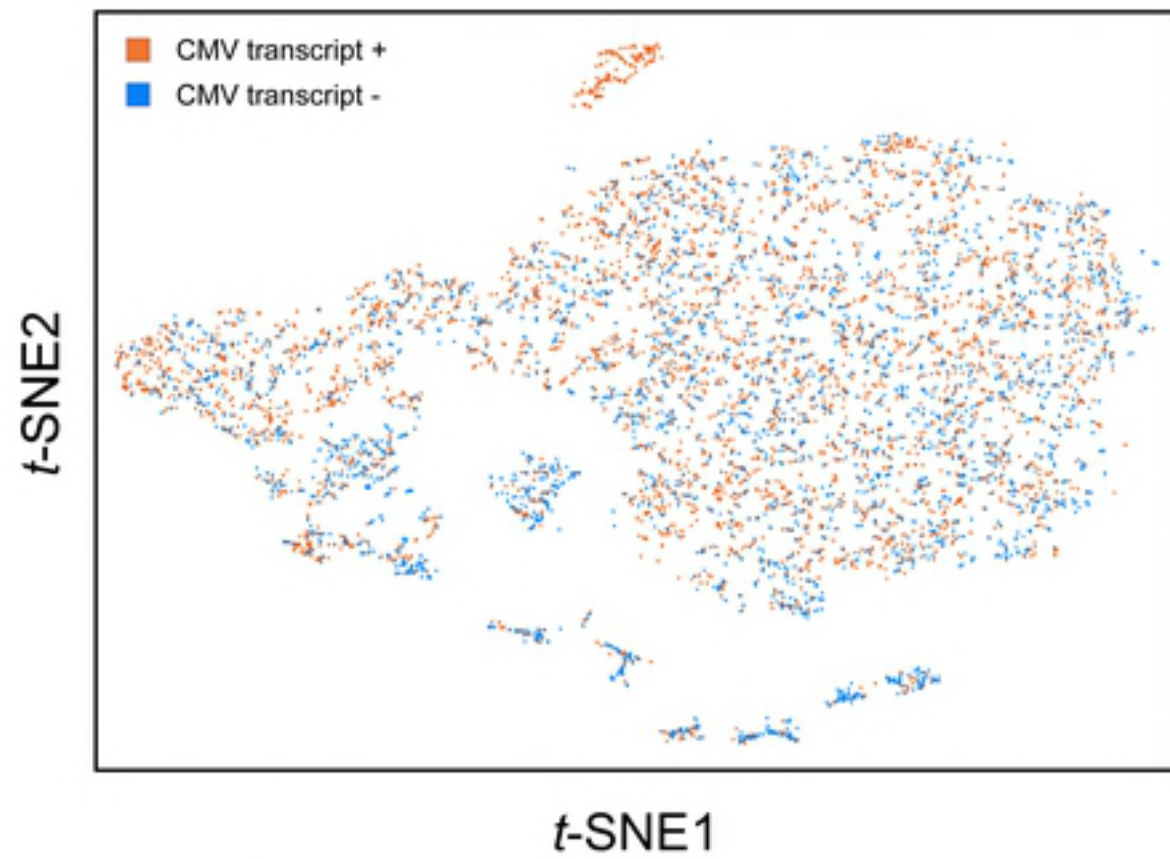

C

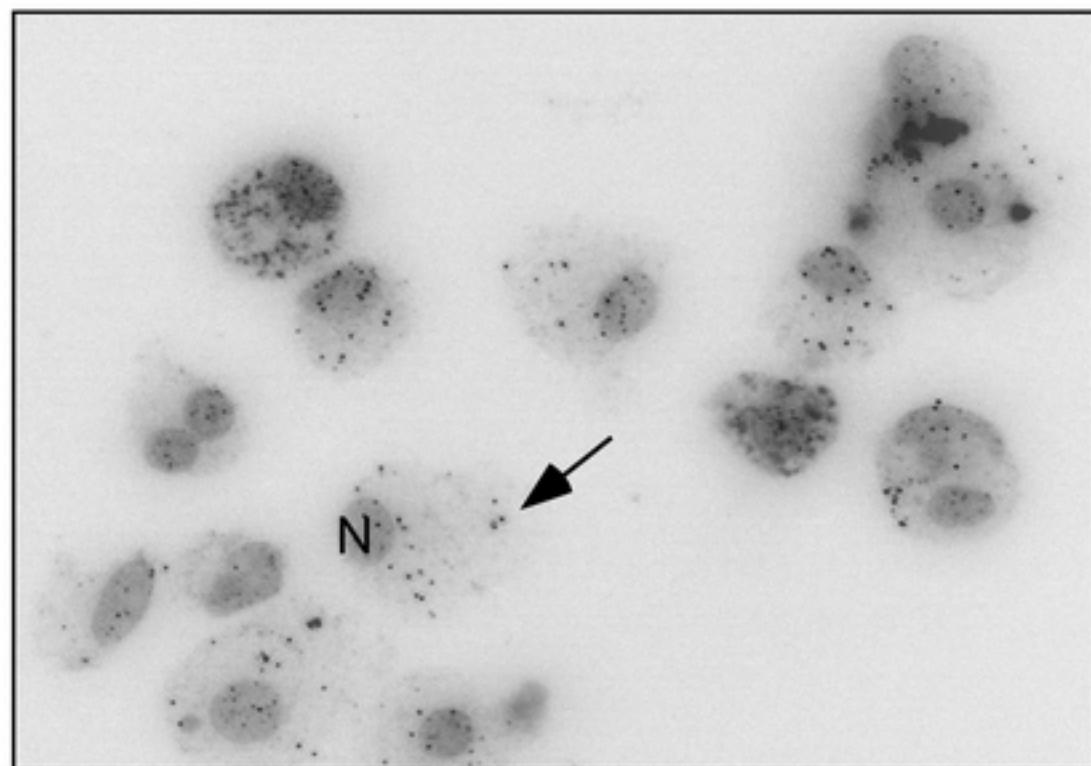

D

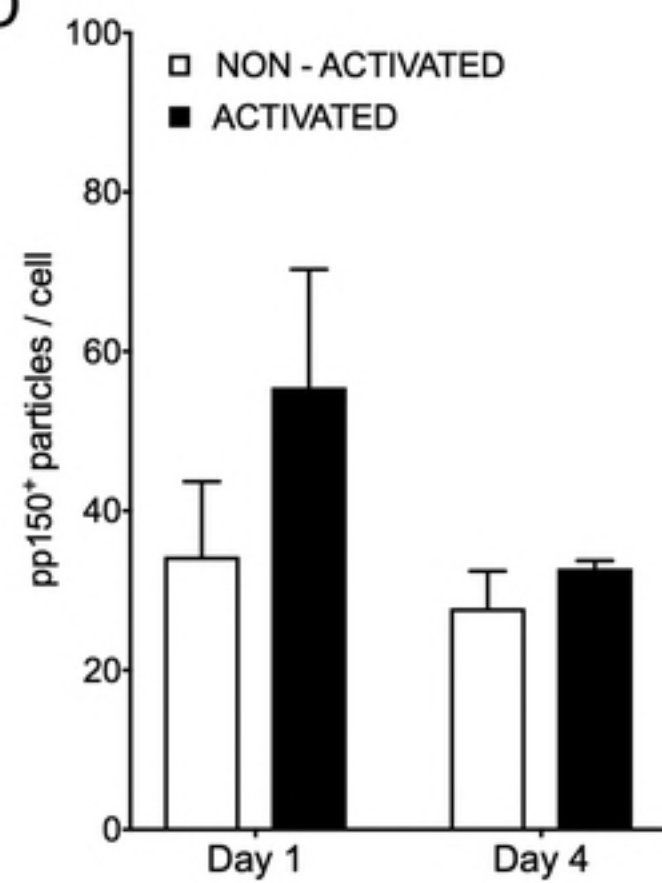

Figure 2

A

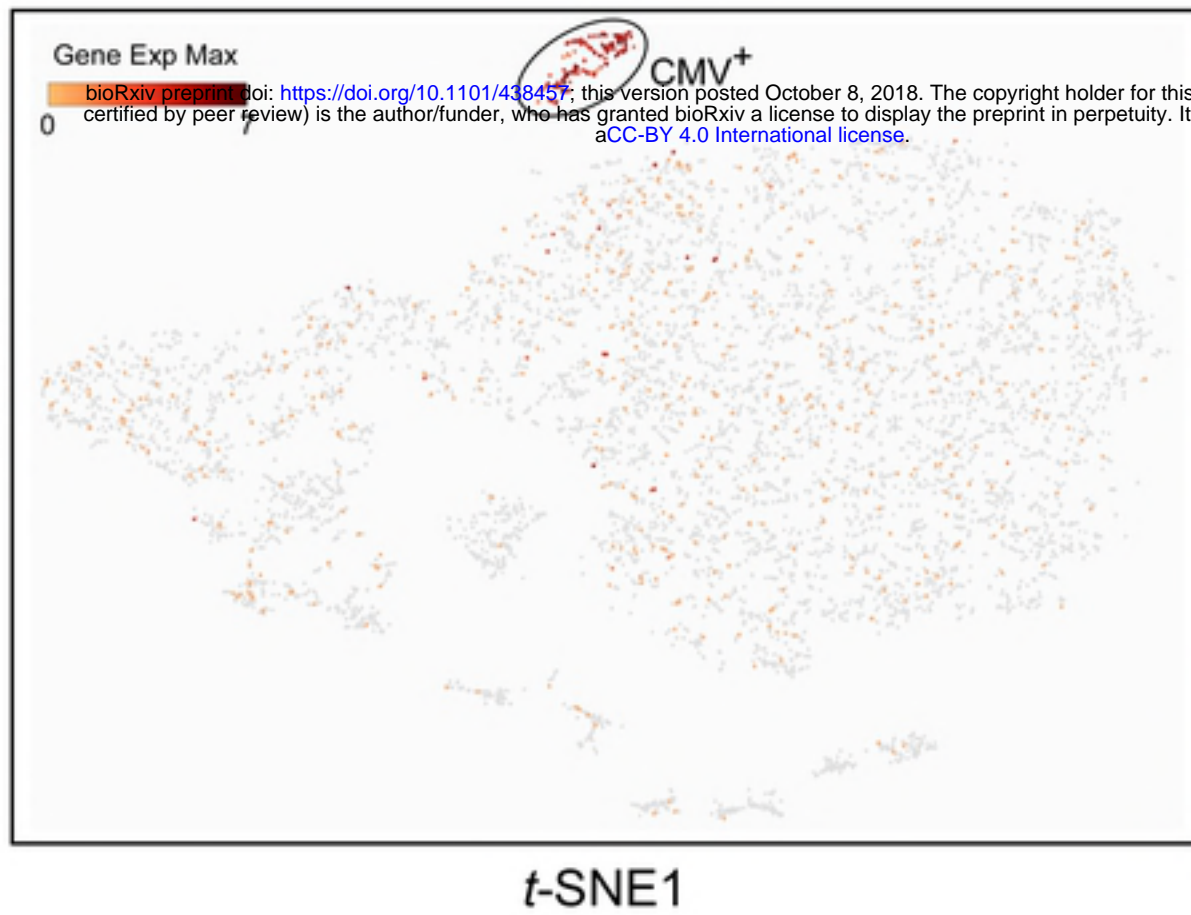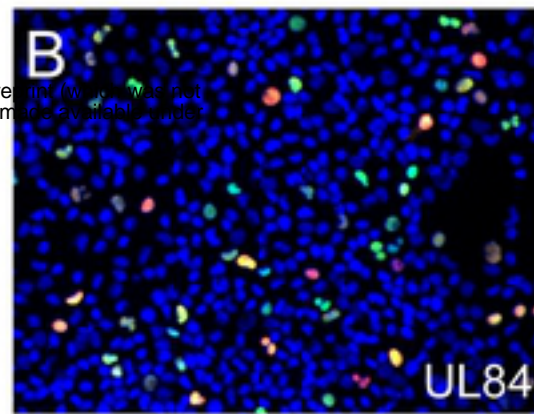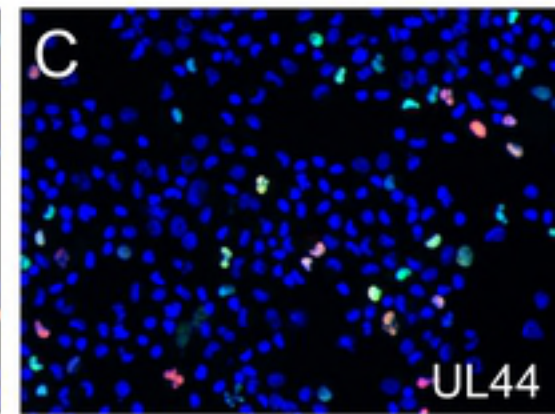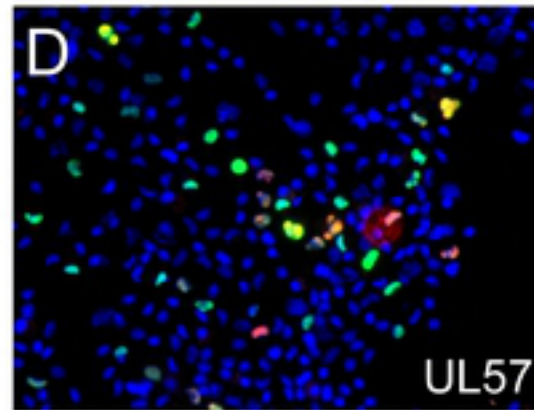

E

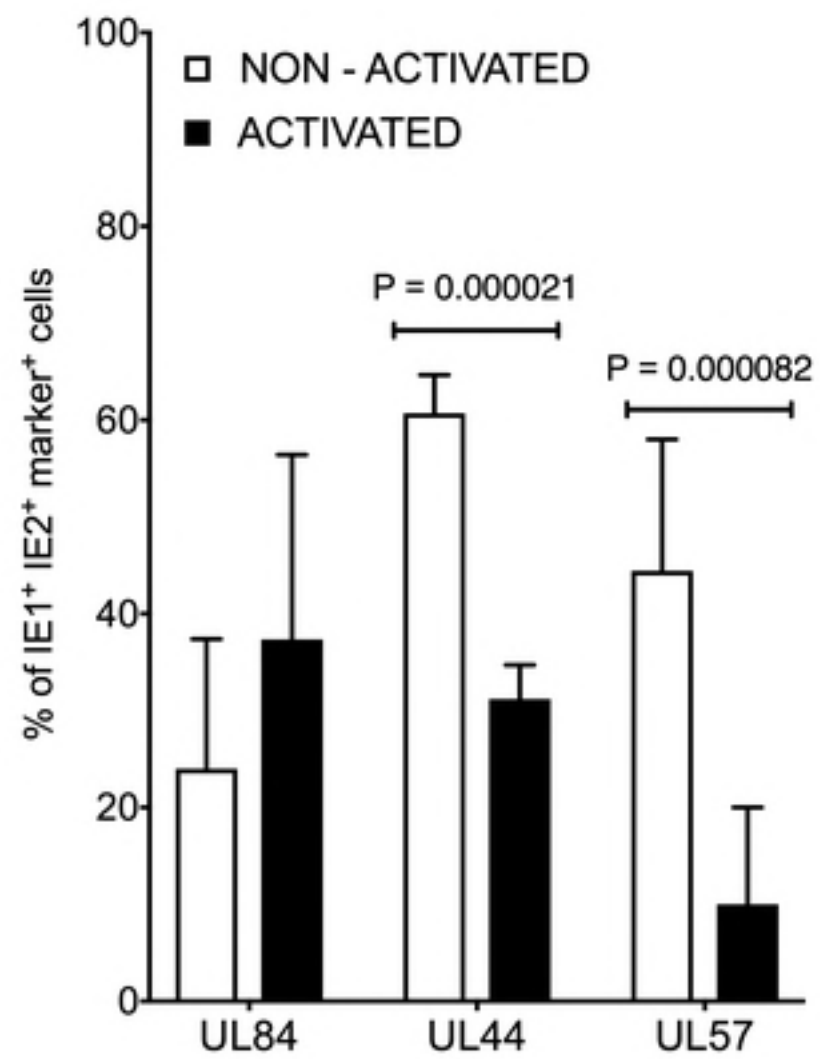

Figure 3

A

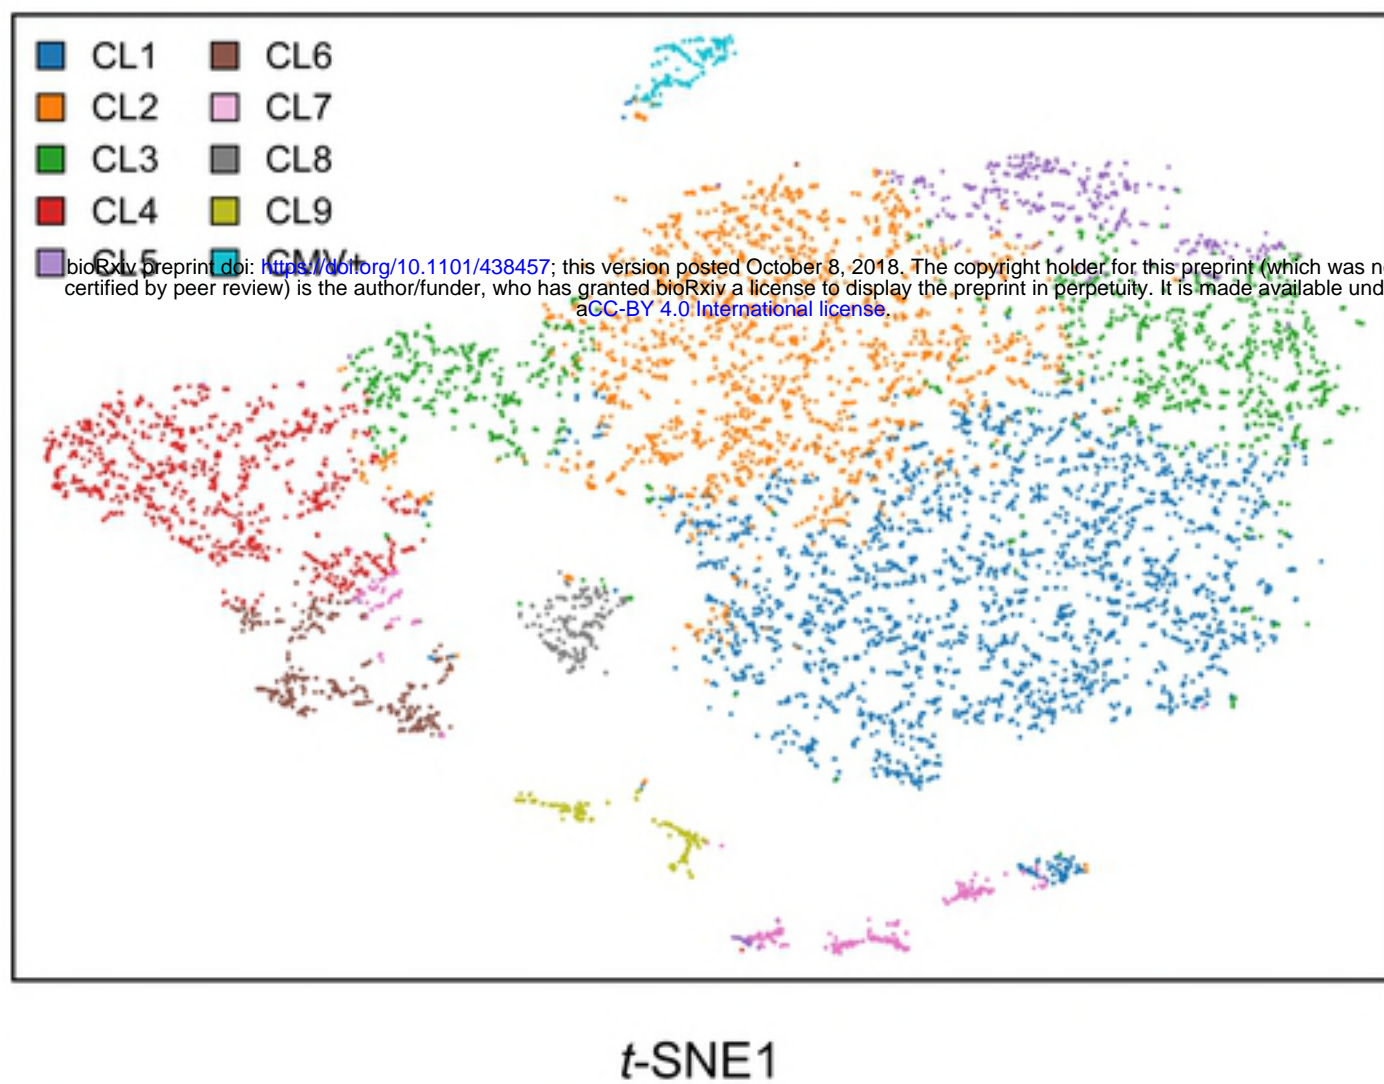

B

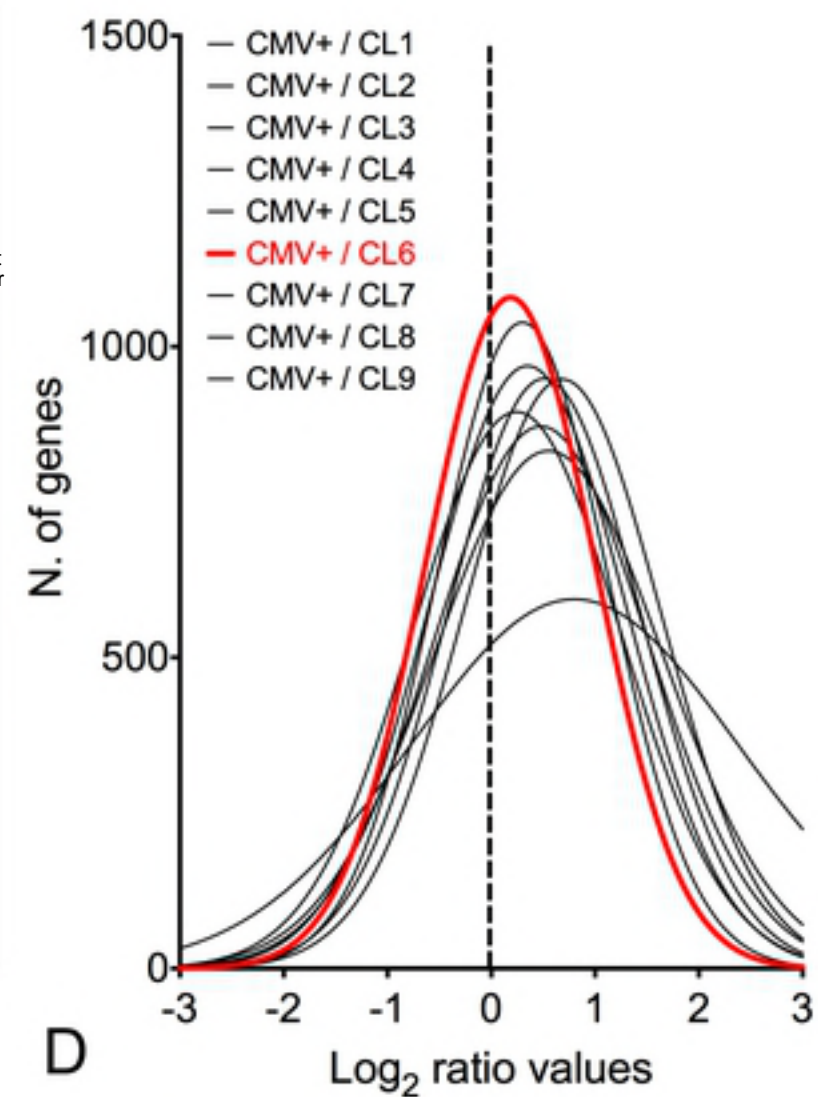

C

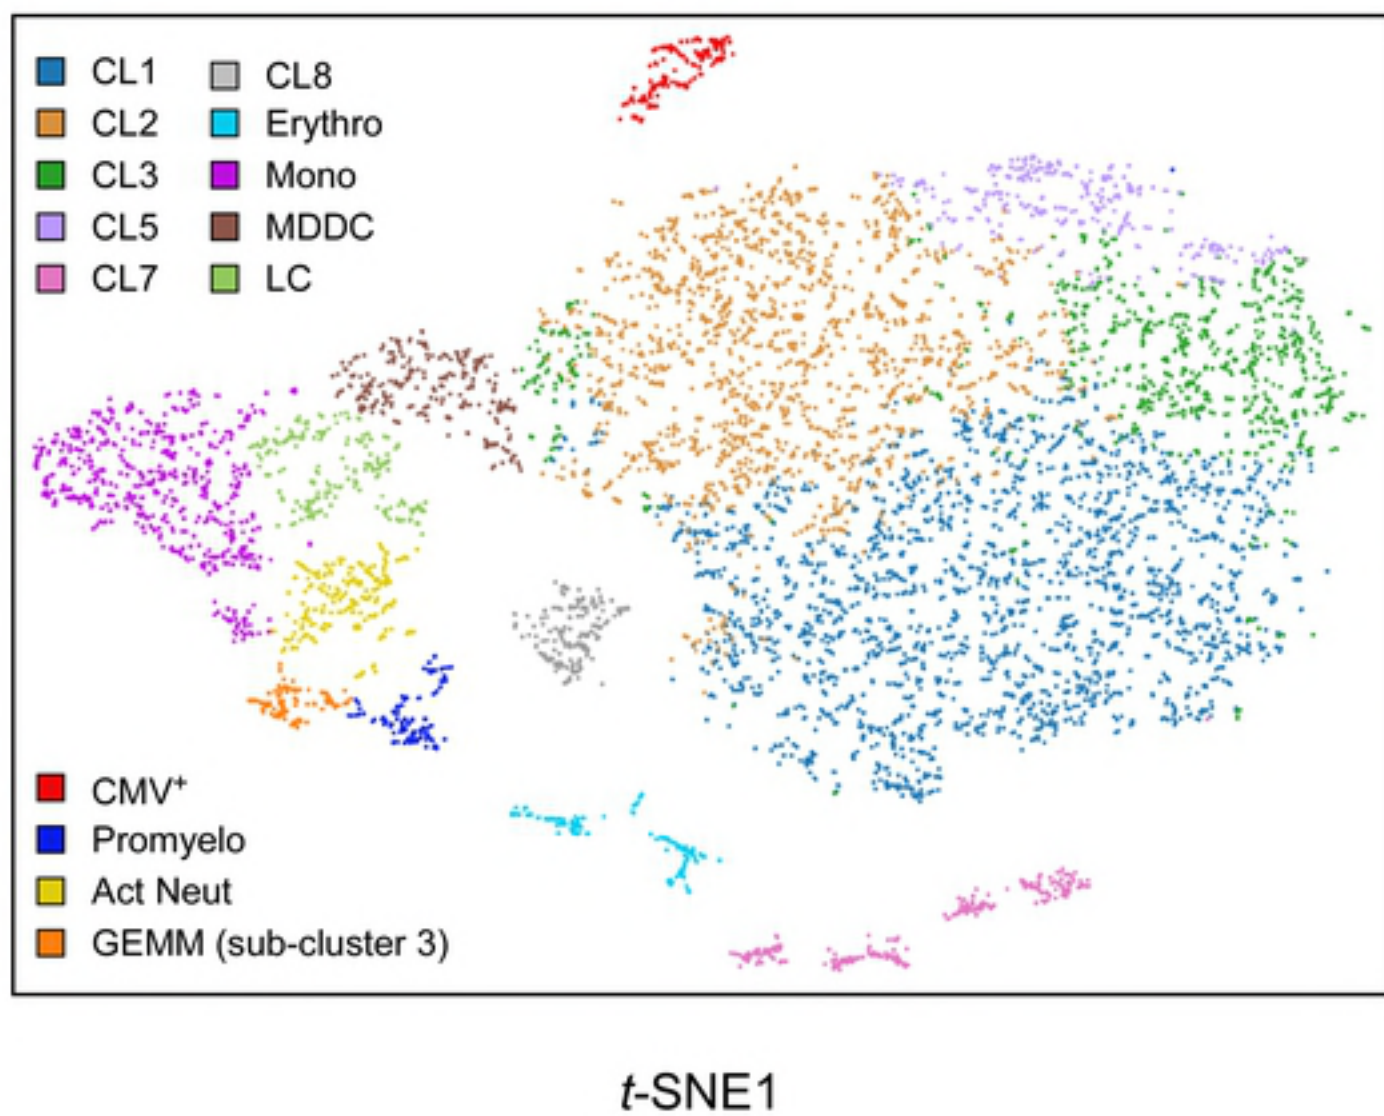

D

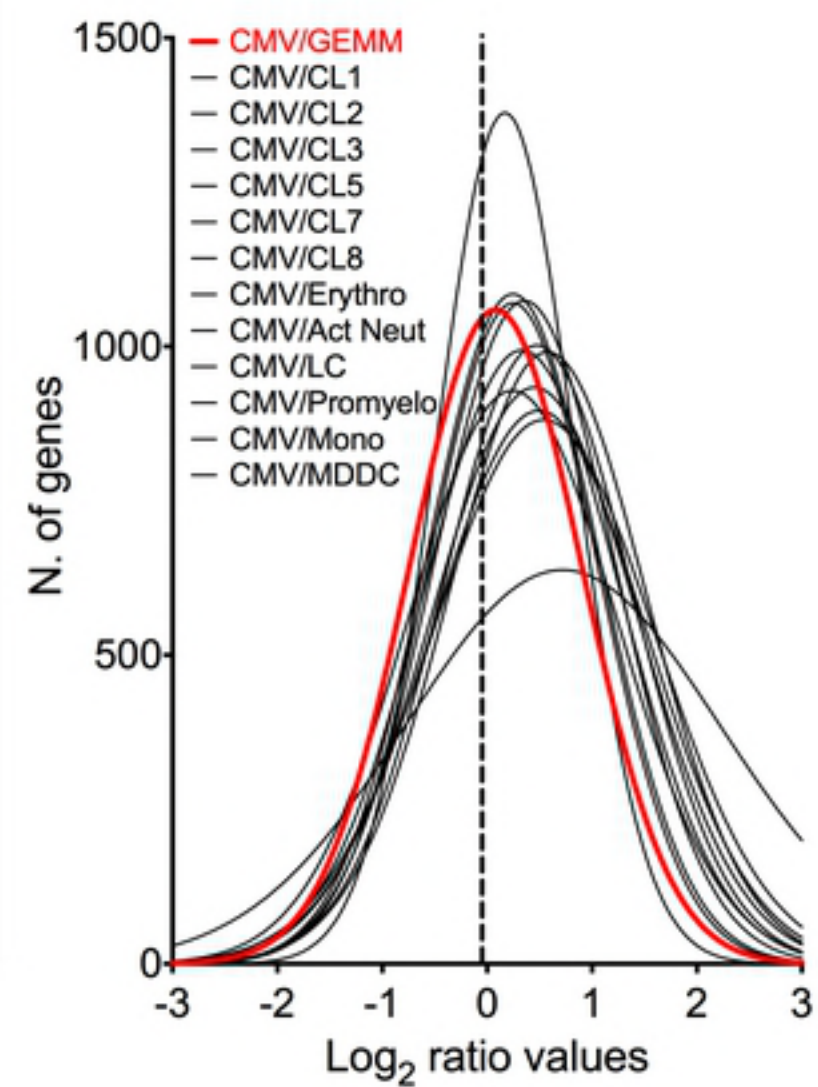

Figure 4

A

Component 1

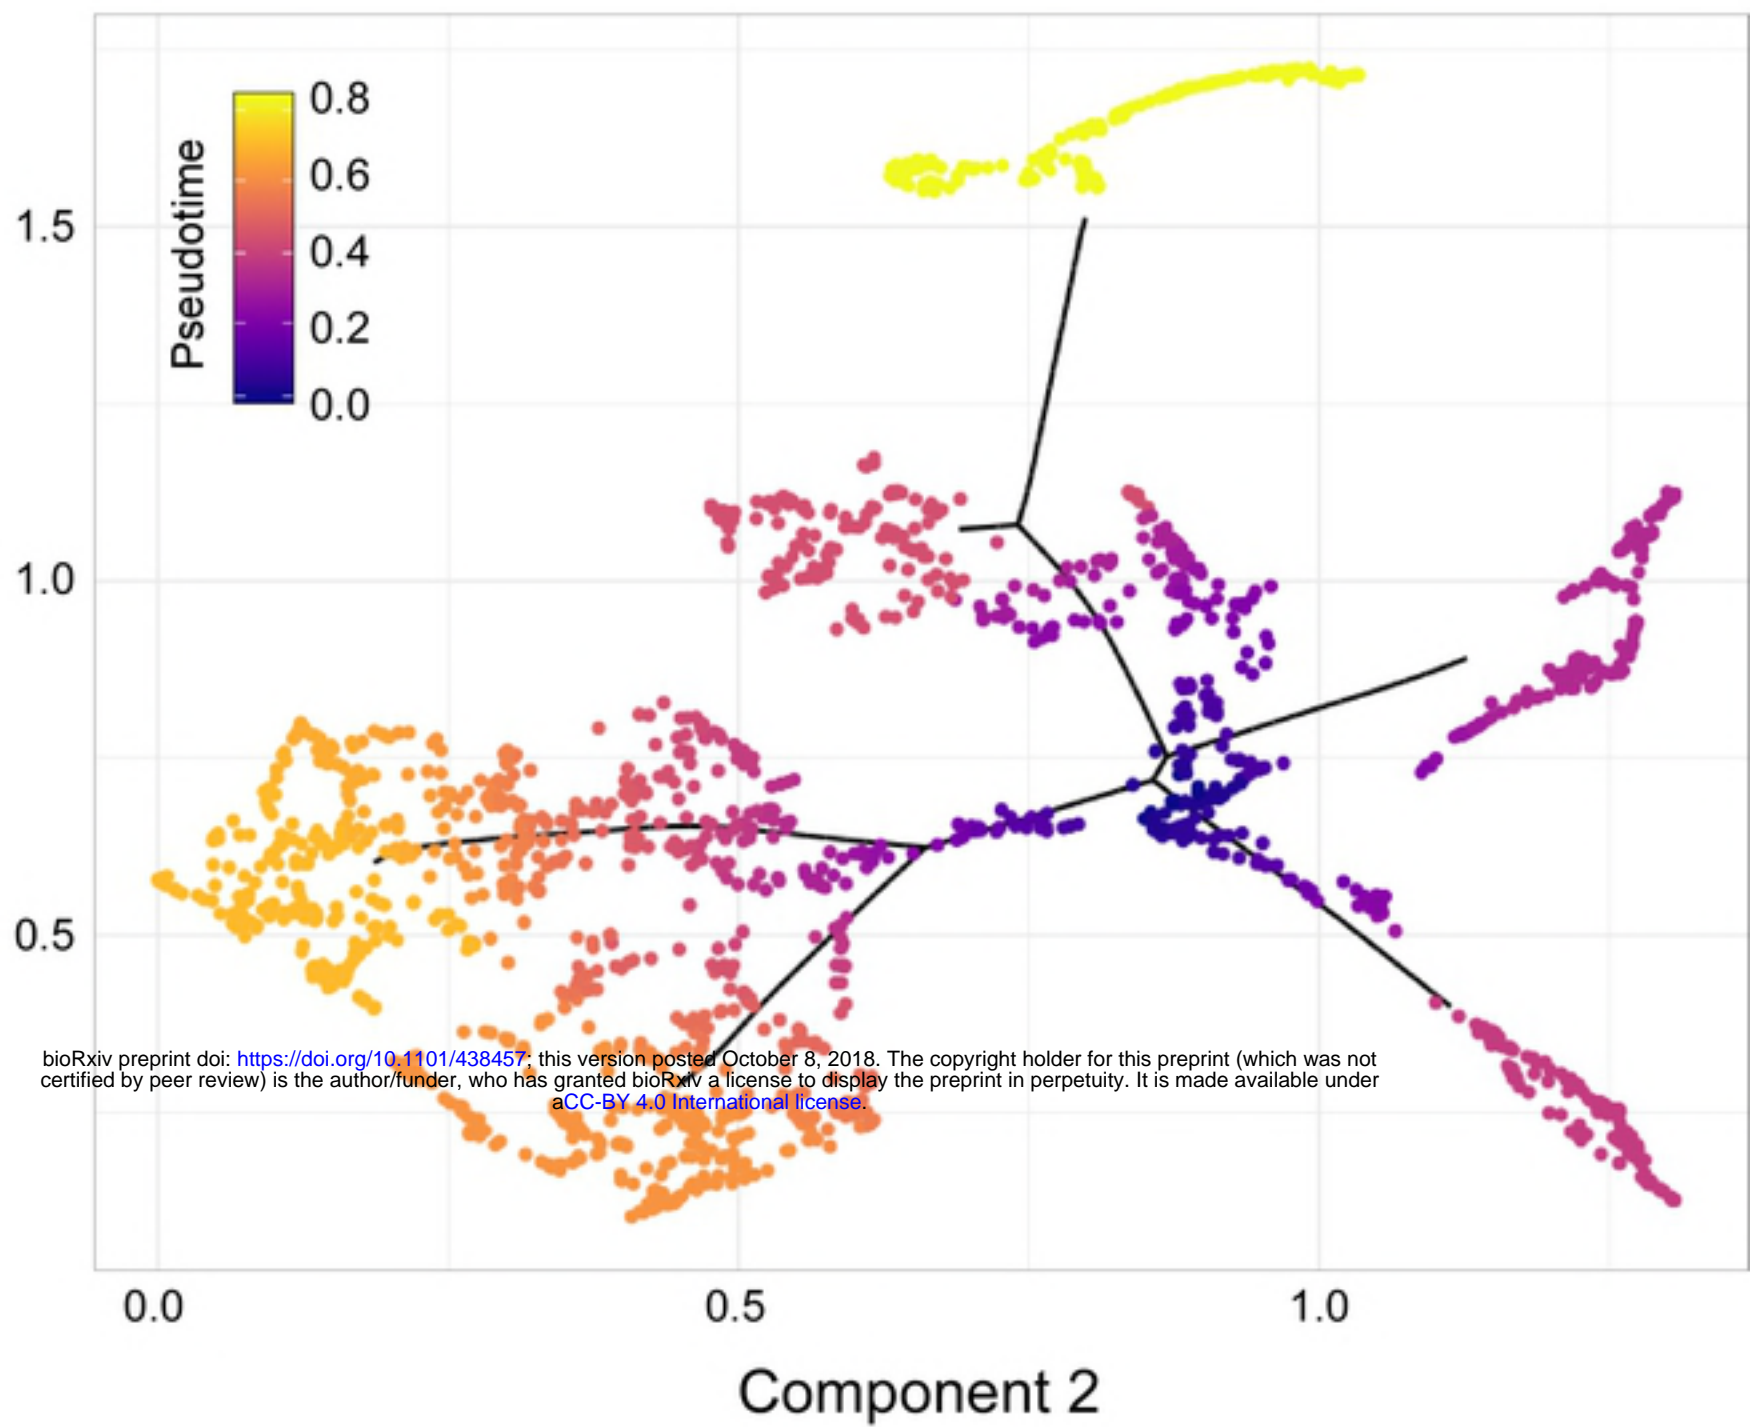

B

Component 1

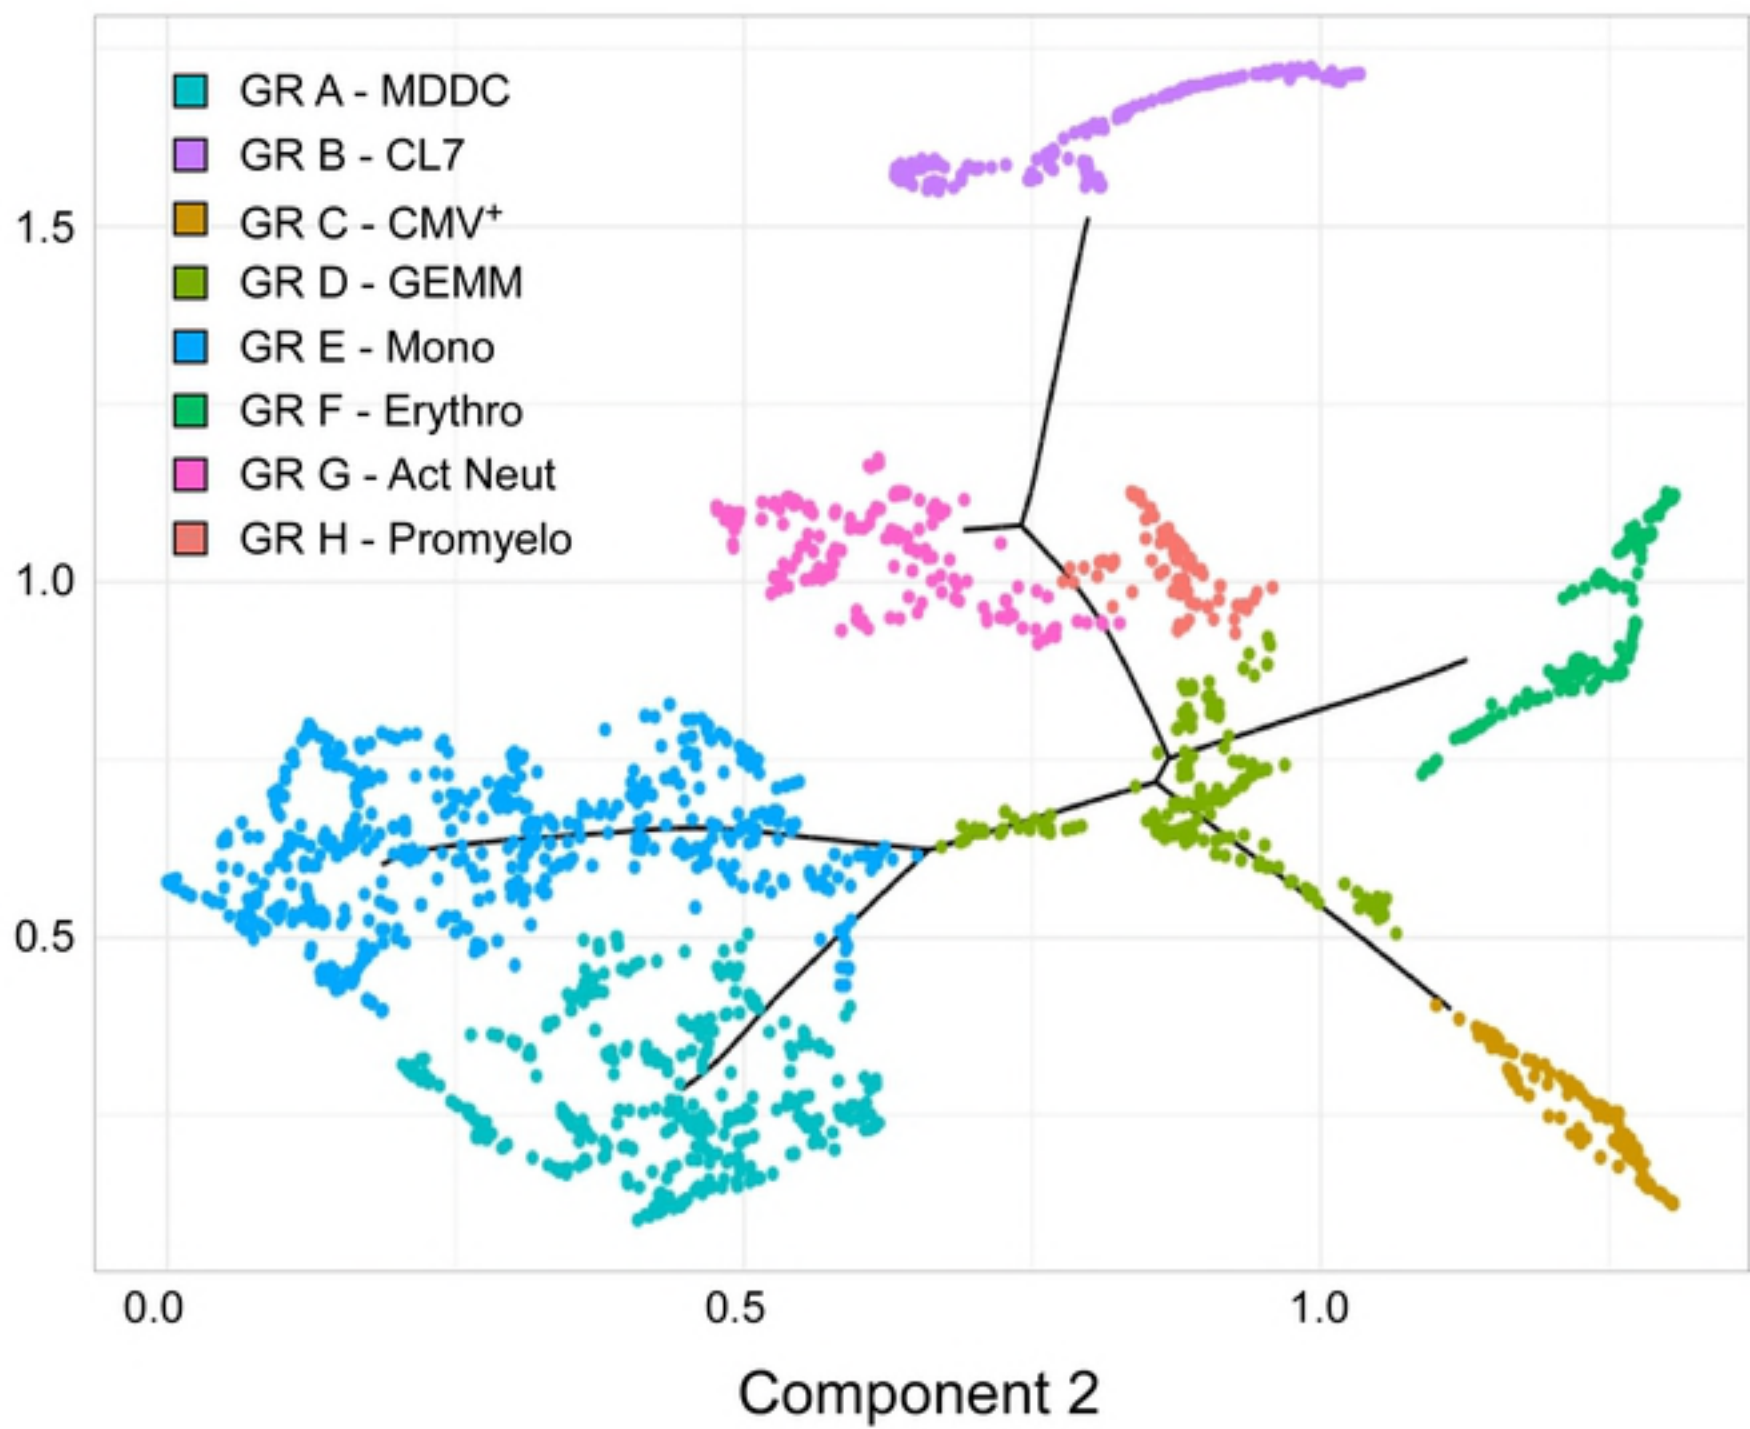

Figure 5

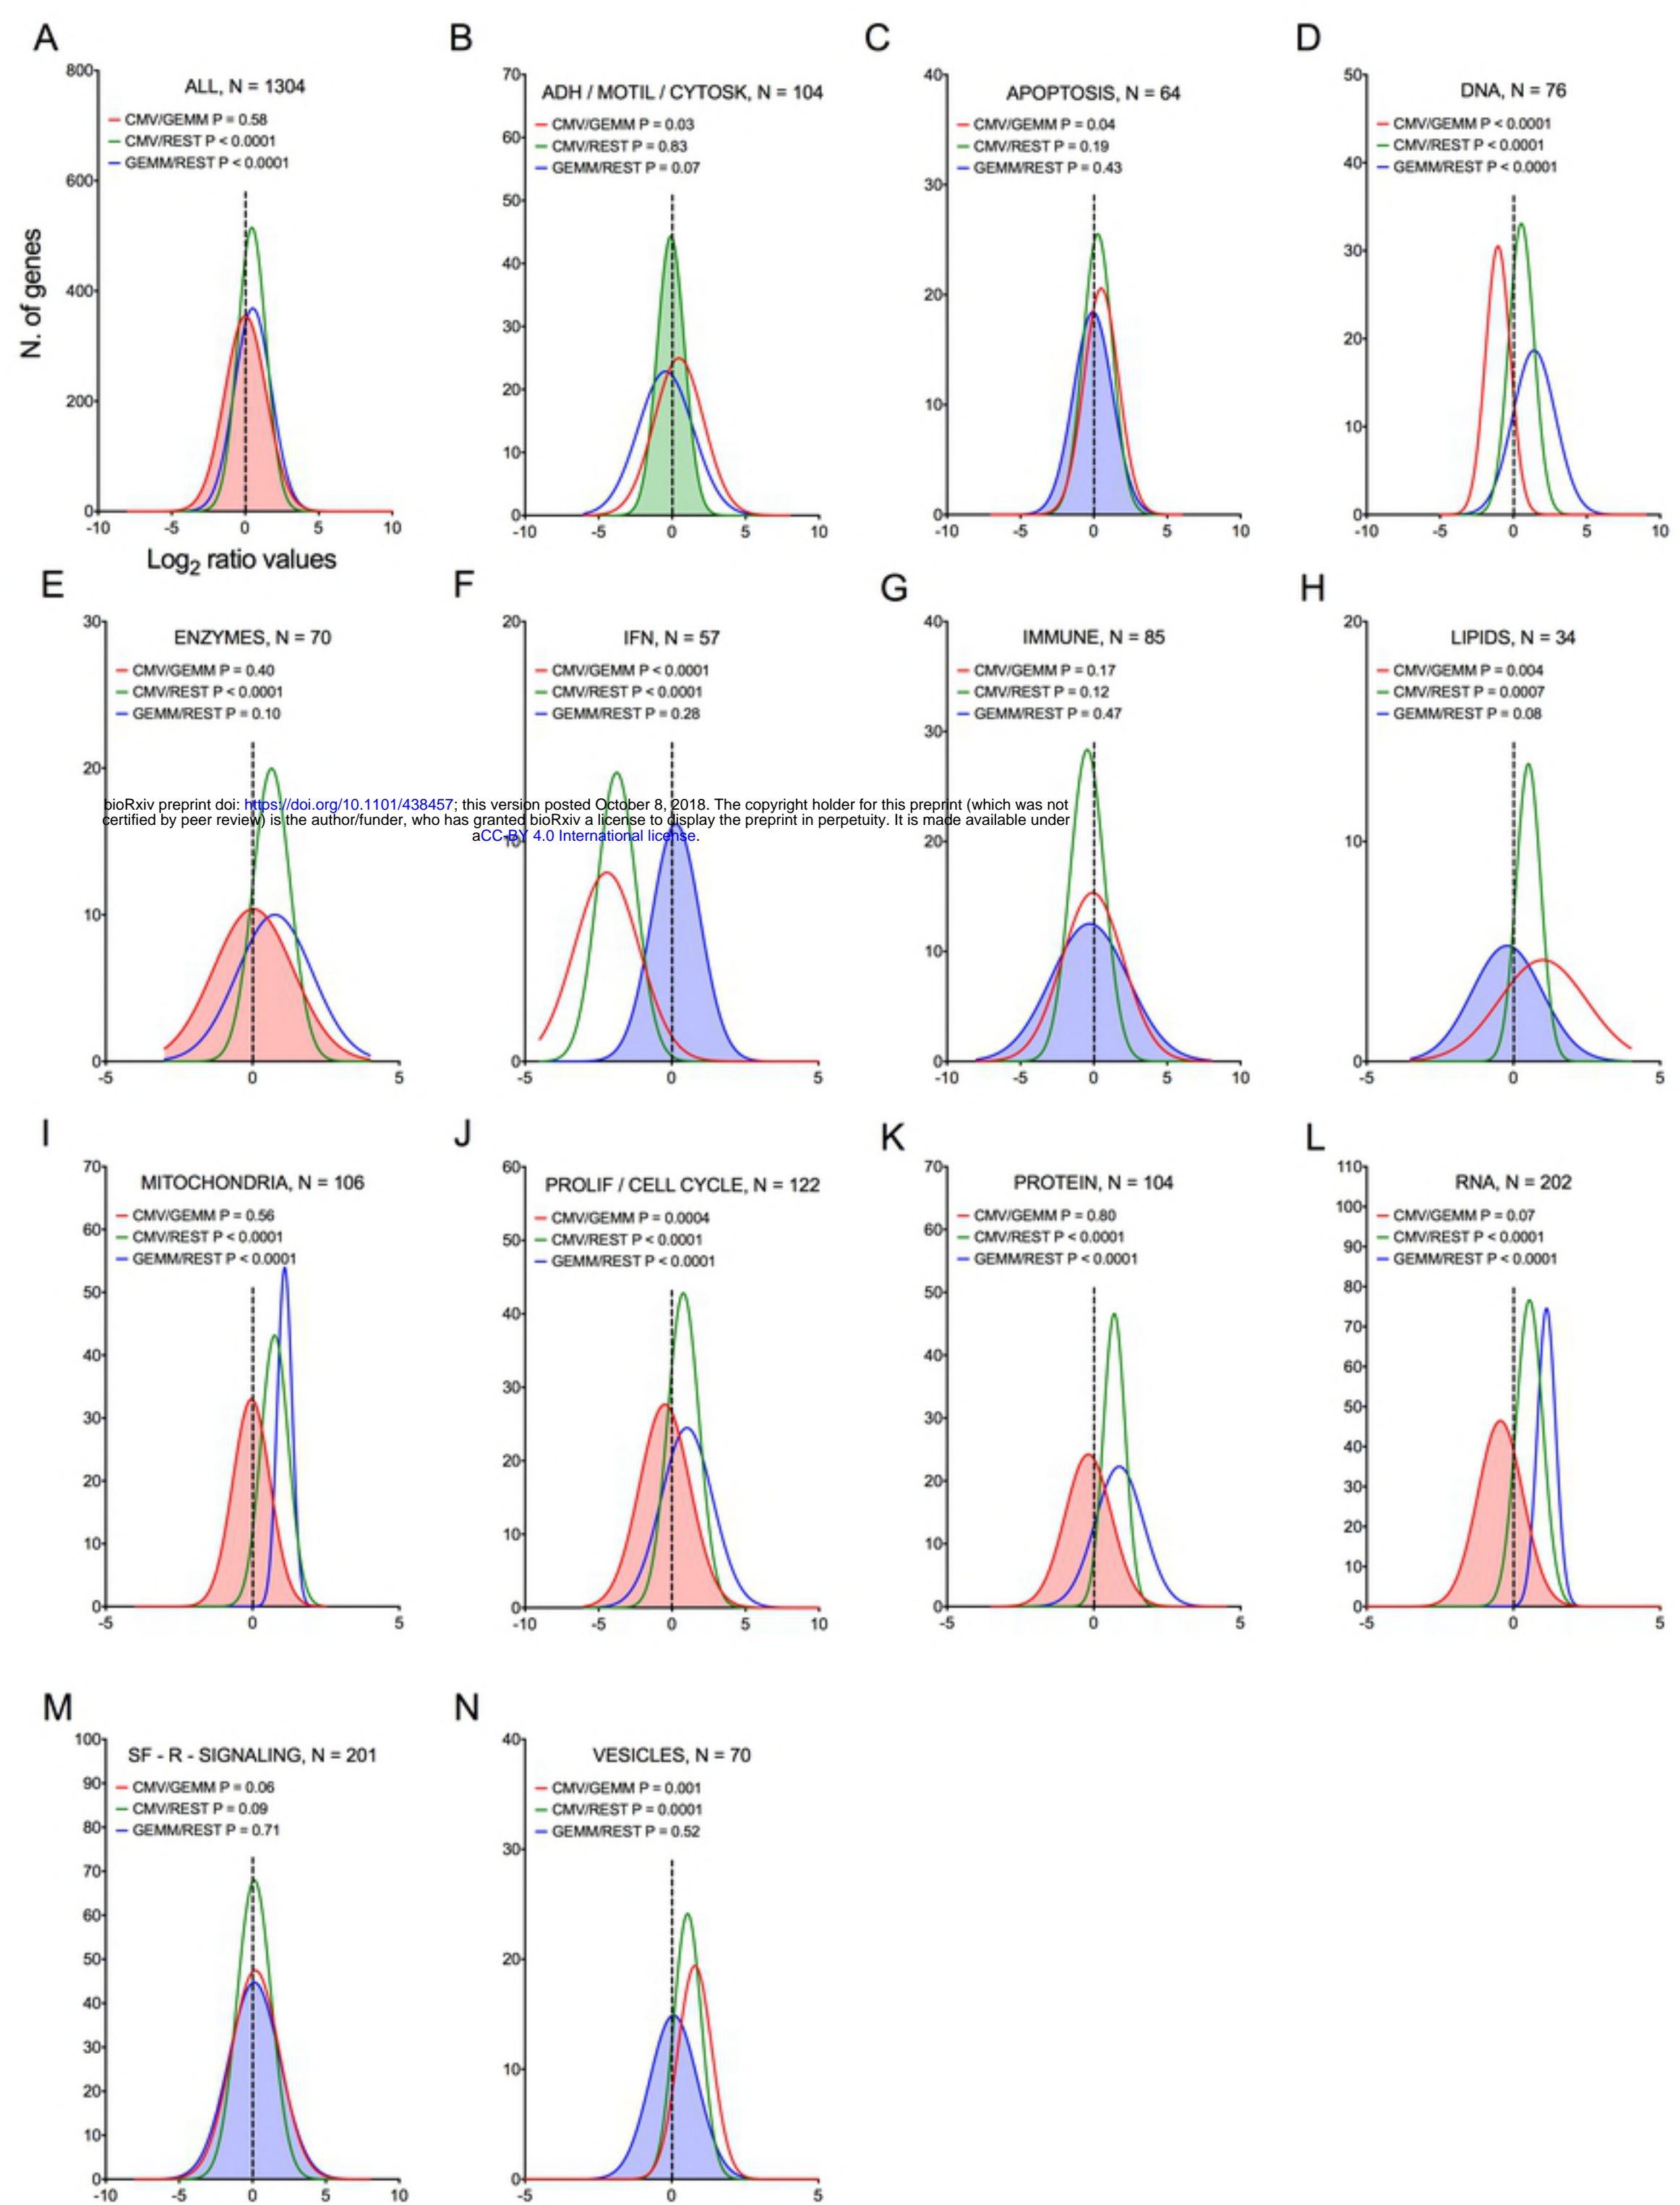

Figure 6

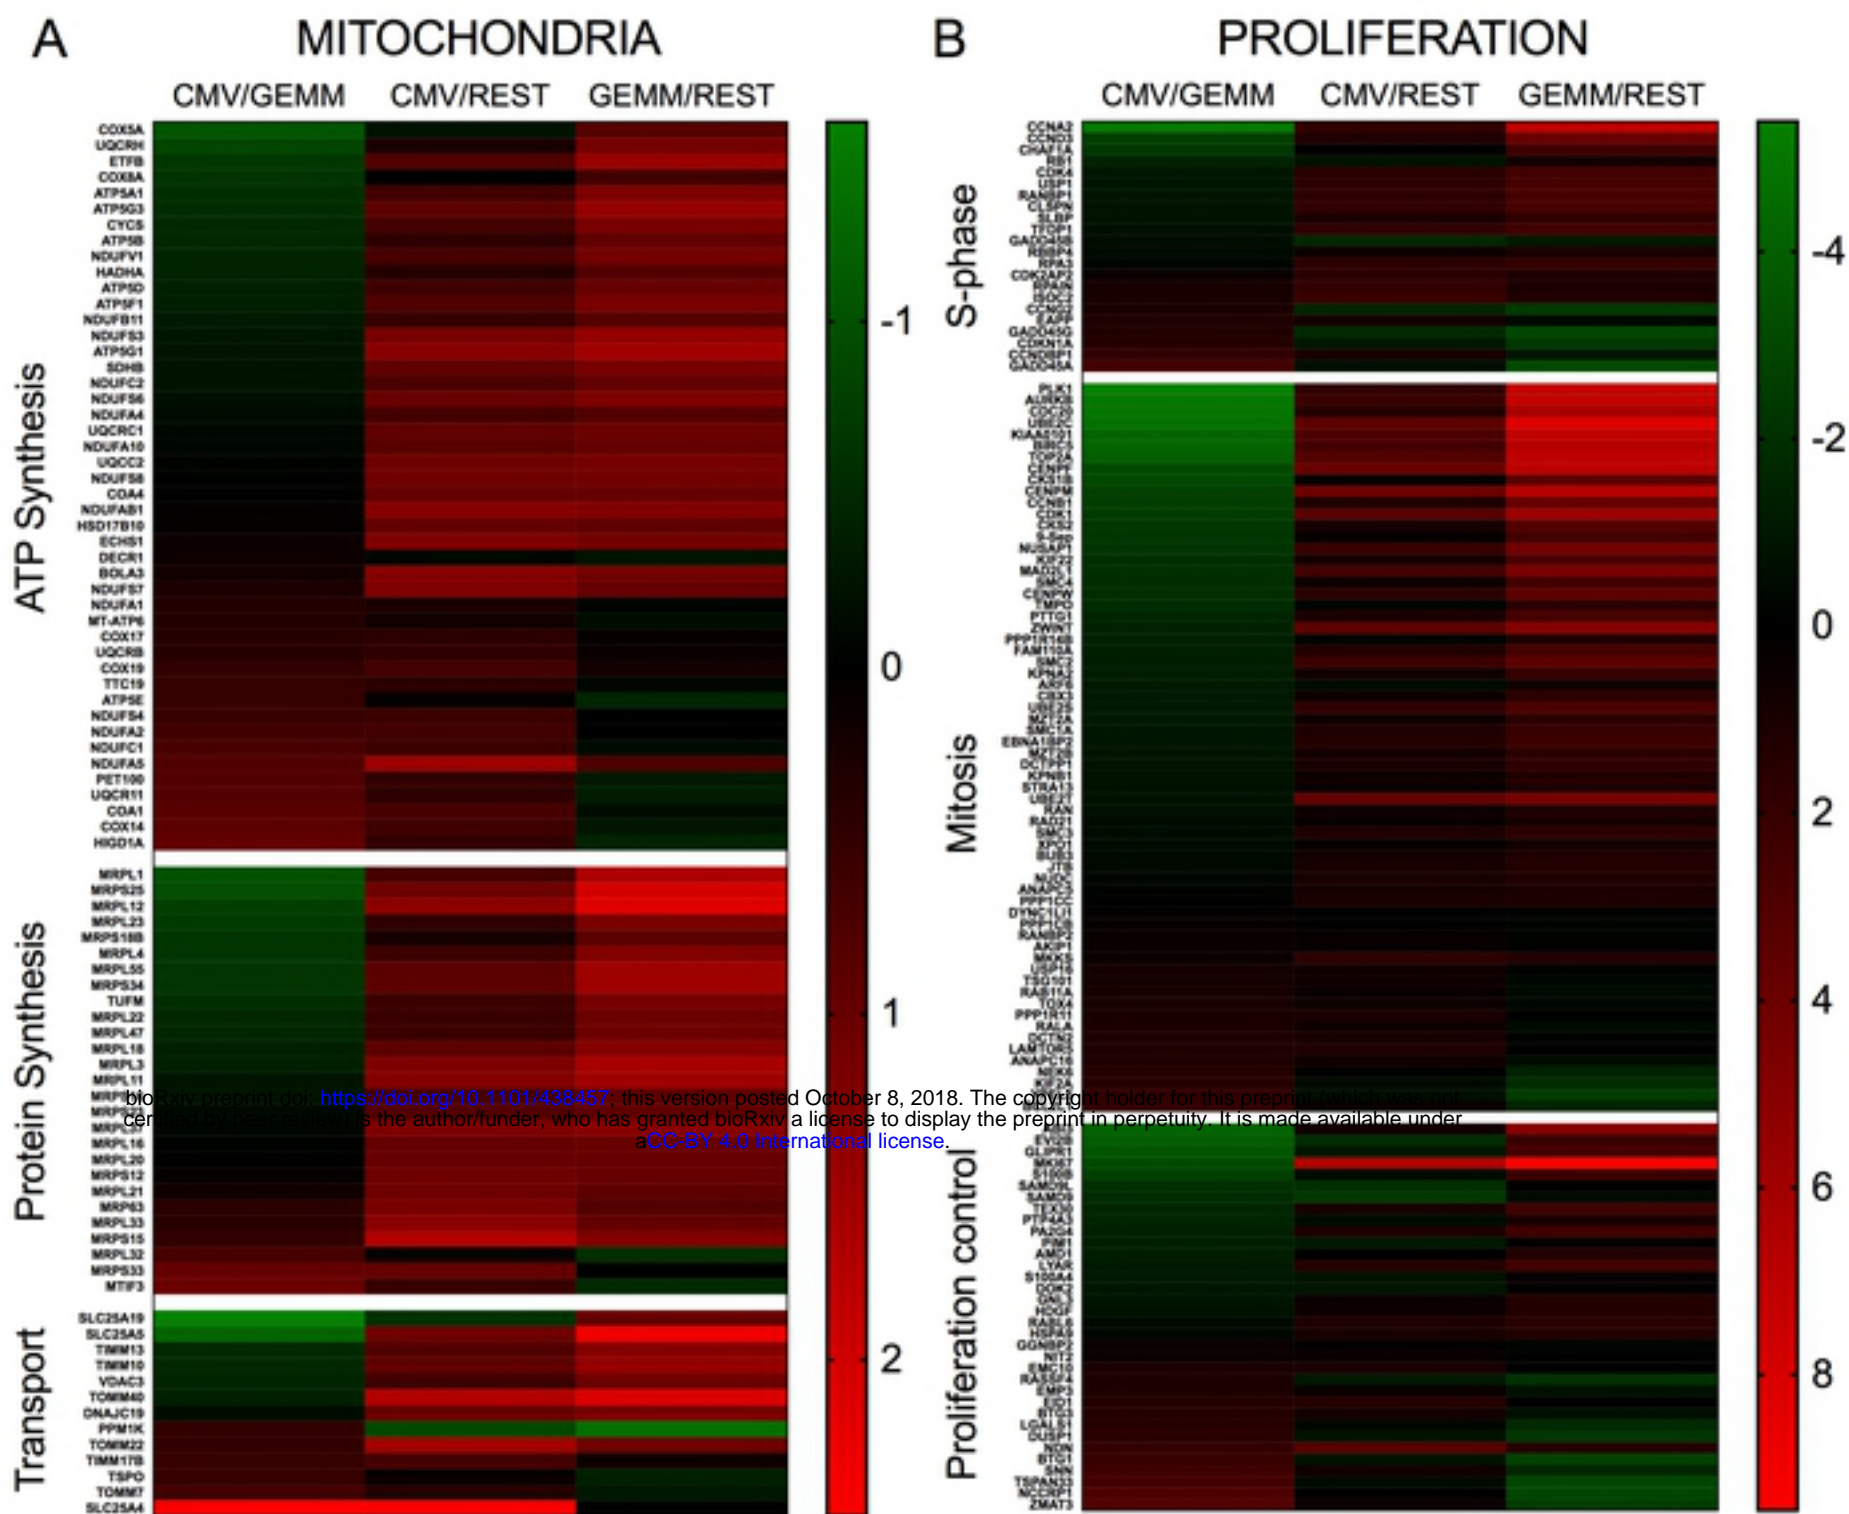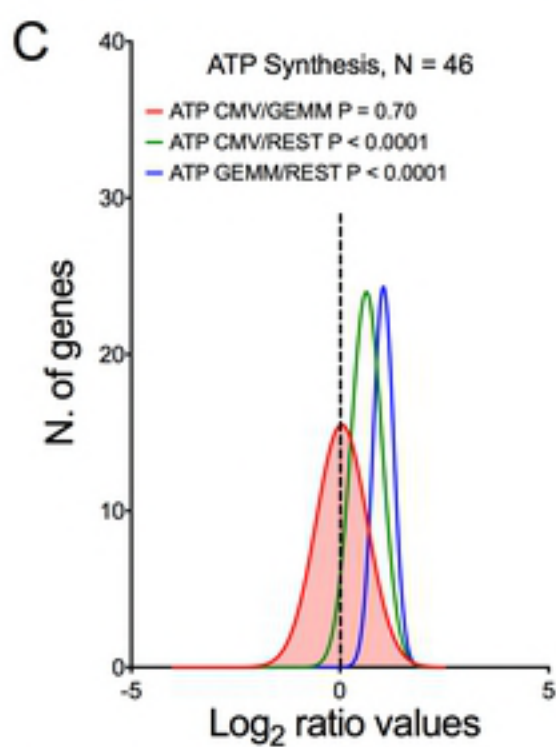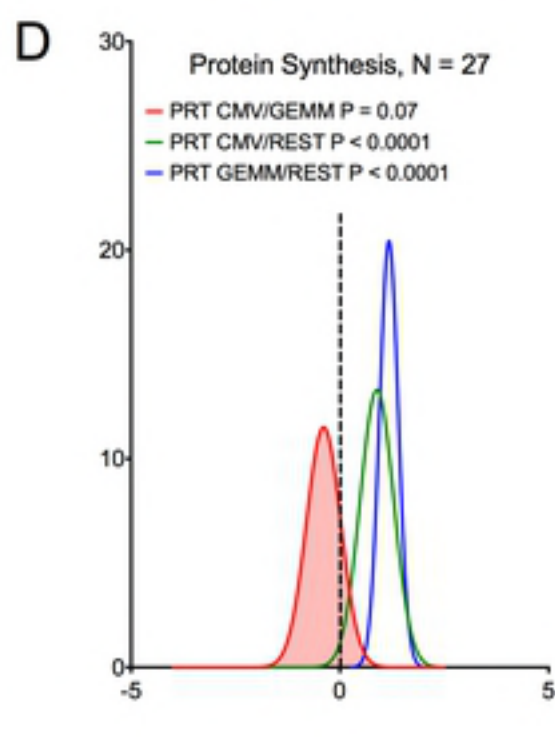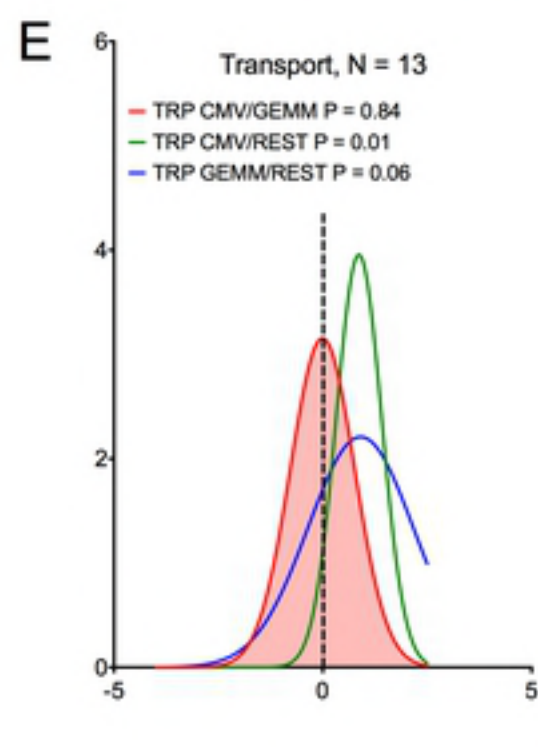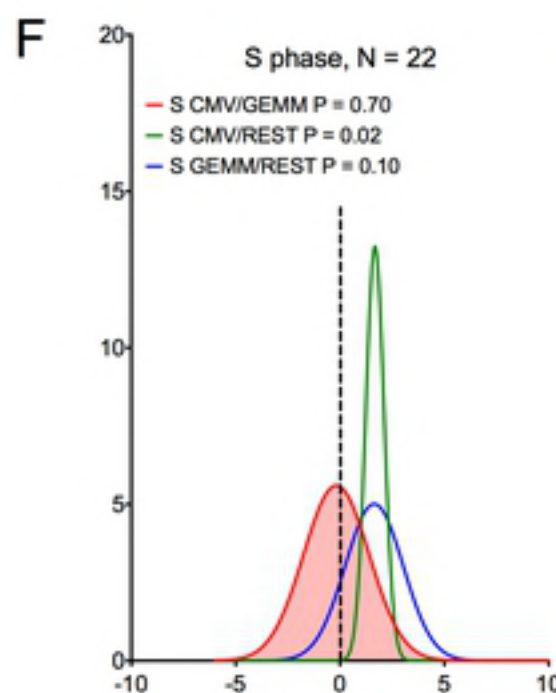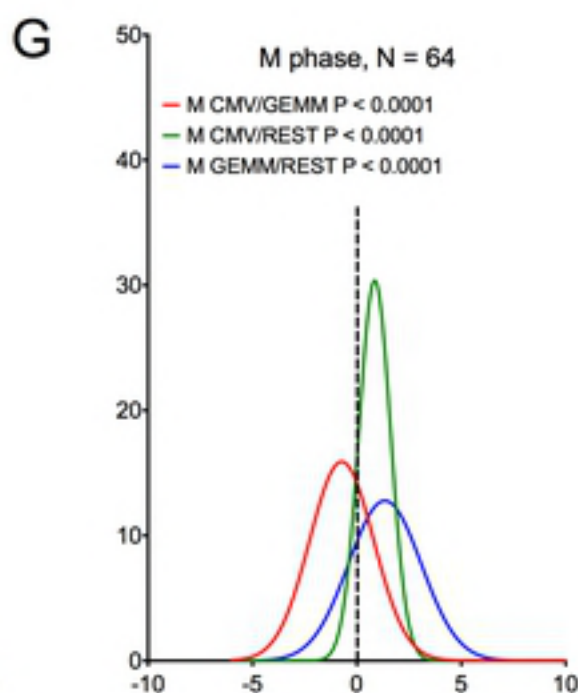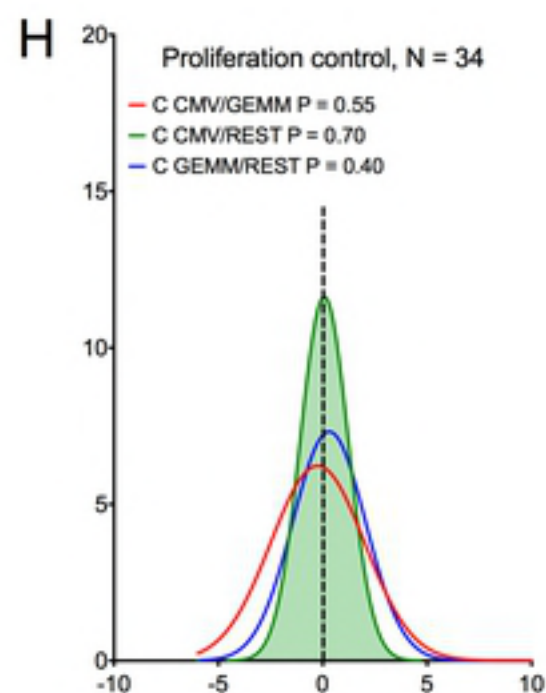

Figure 7



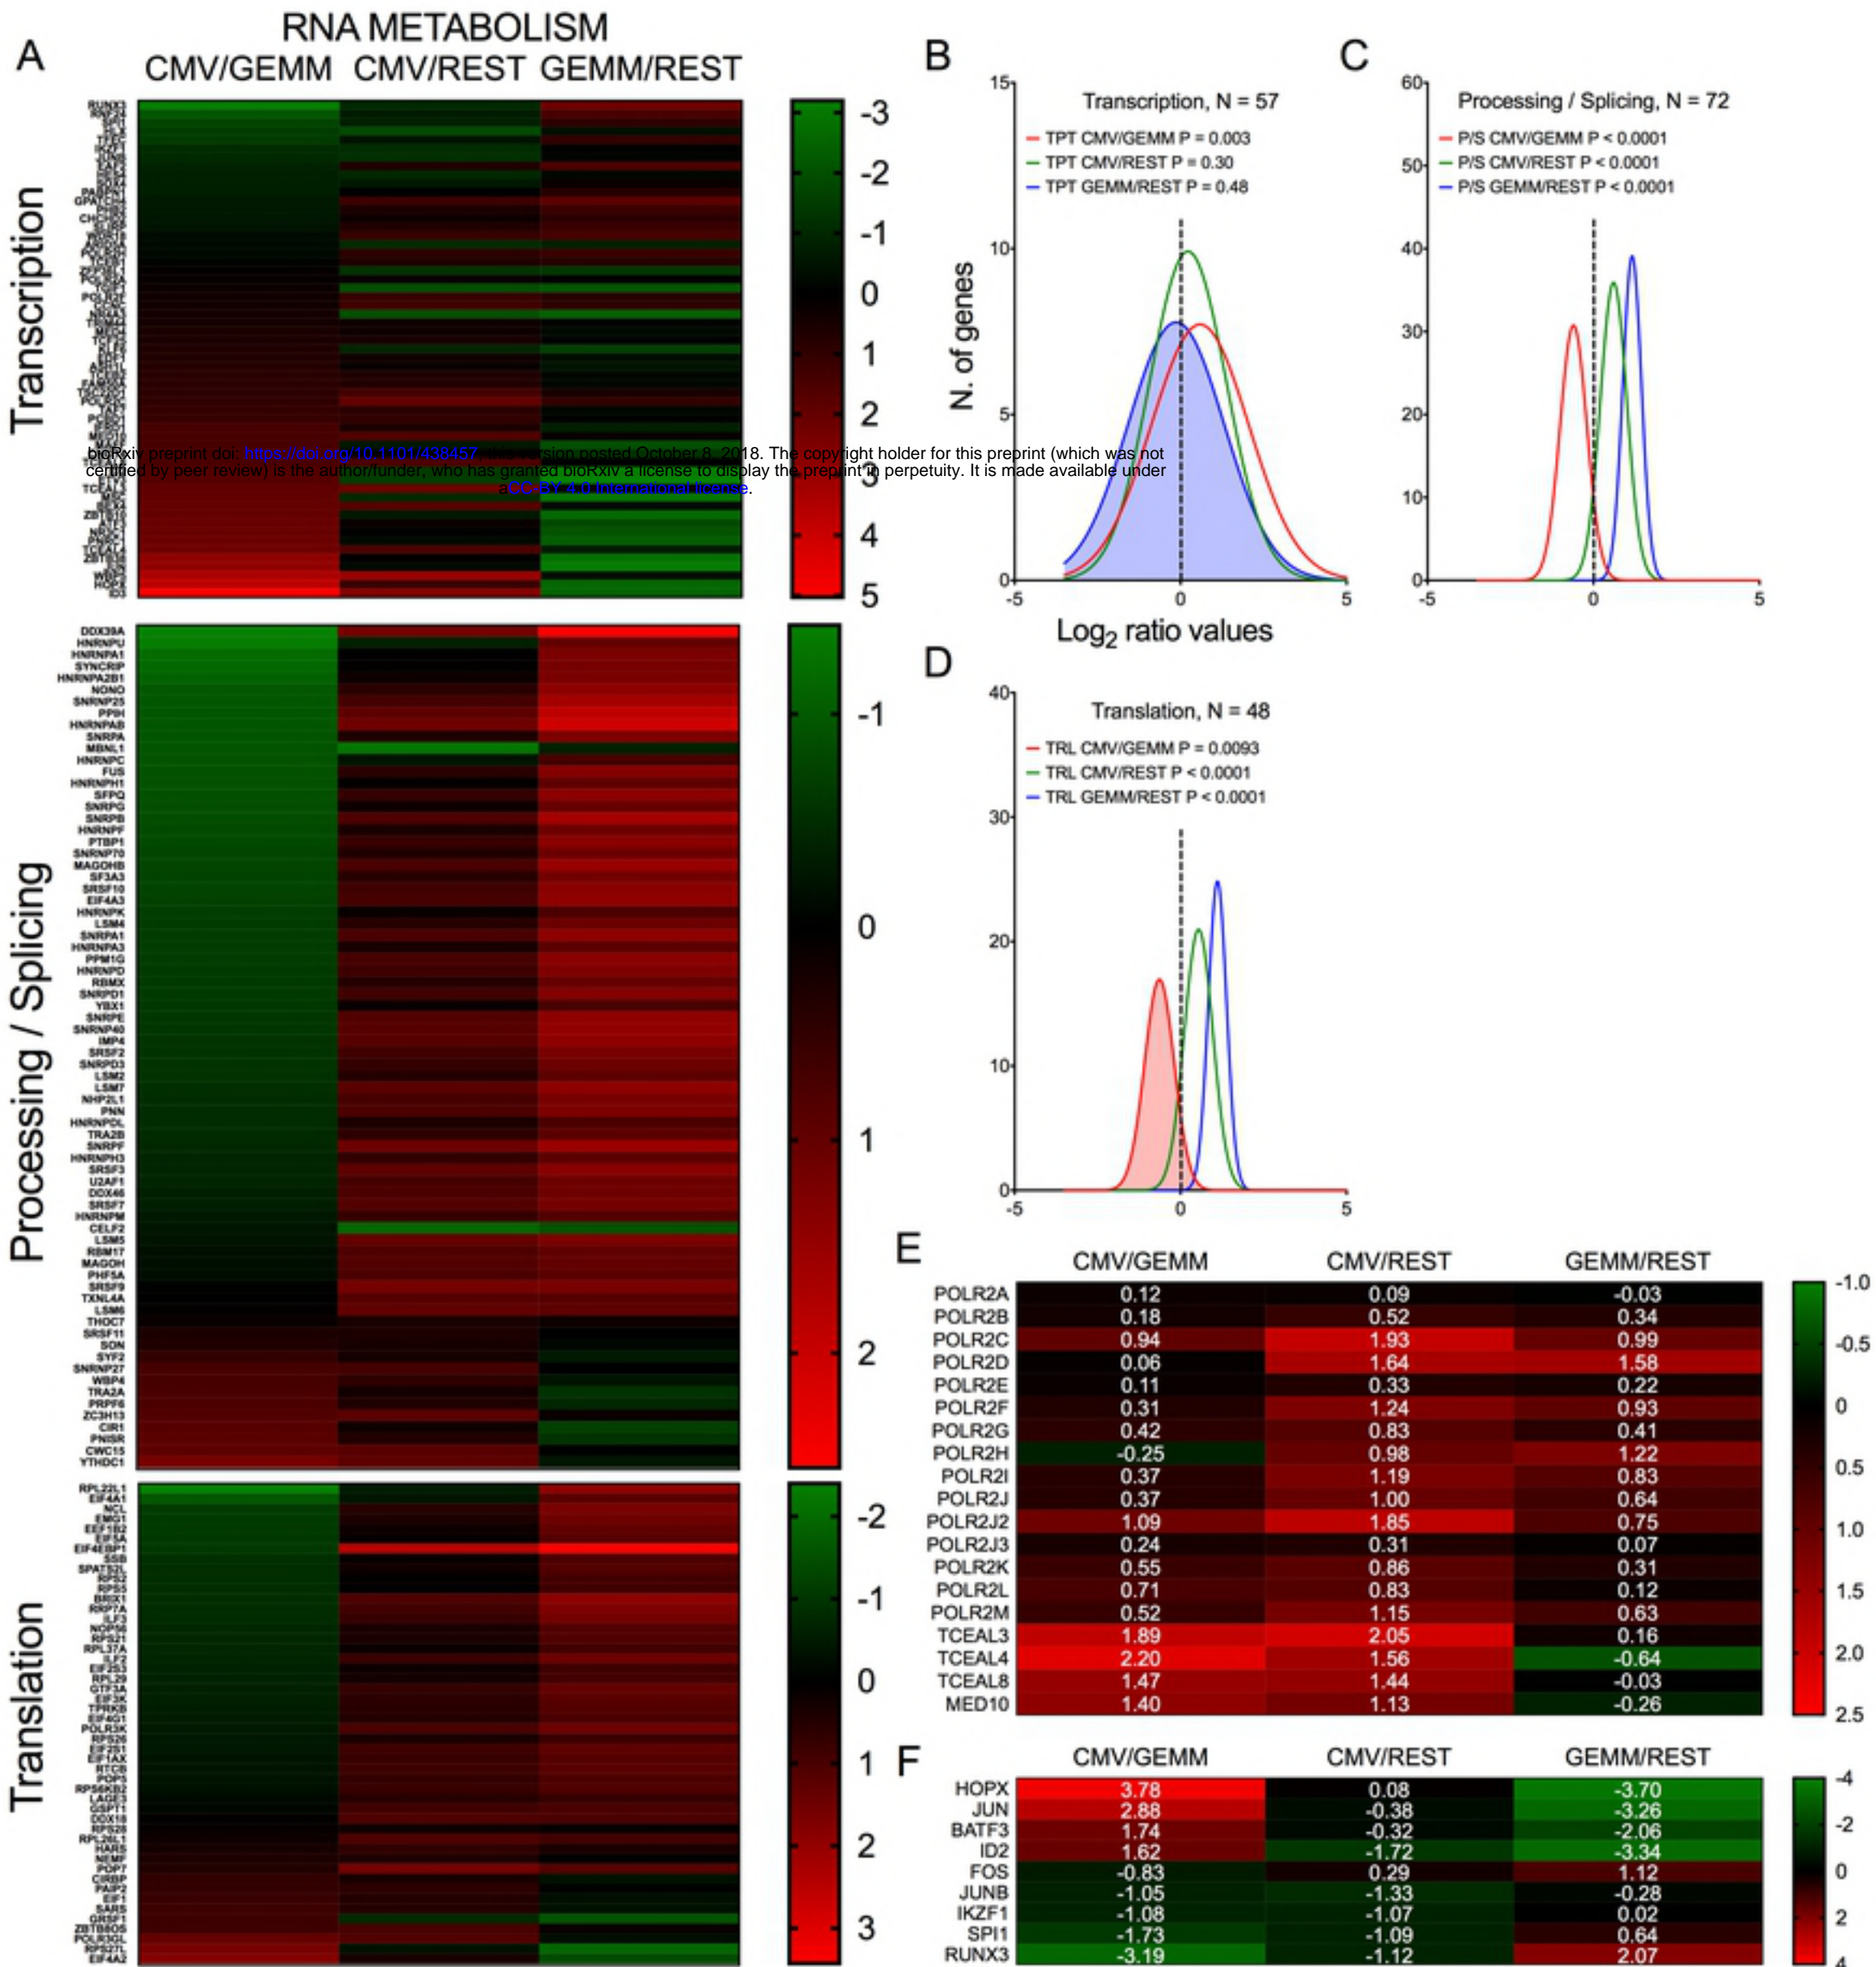

Figure 8

# PROTEIN METABOLISM

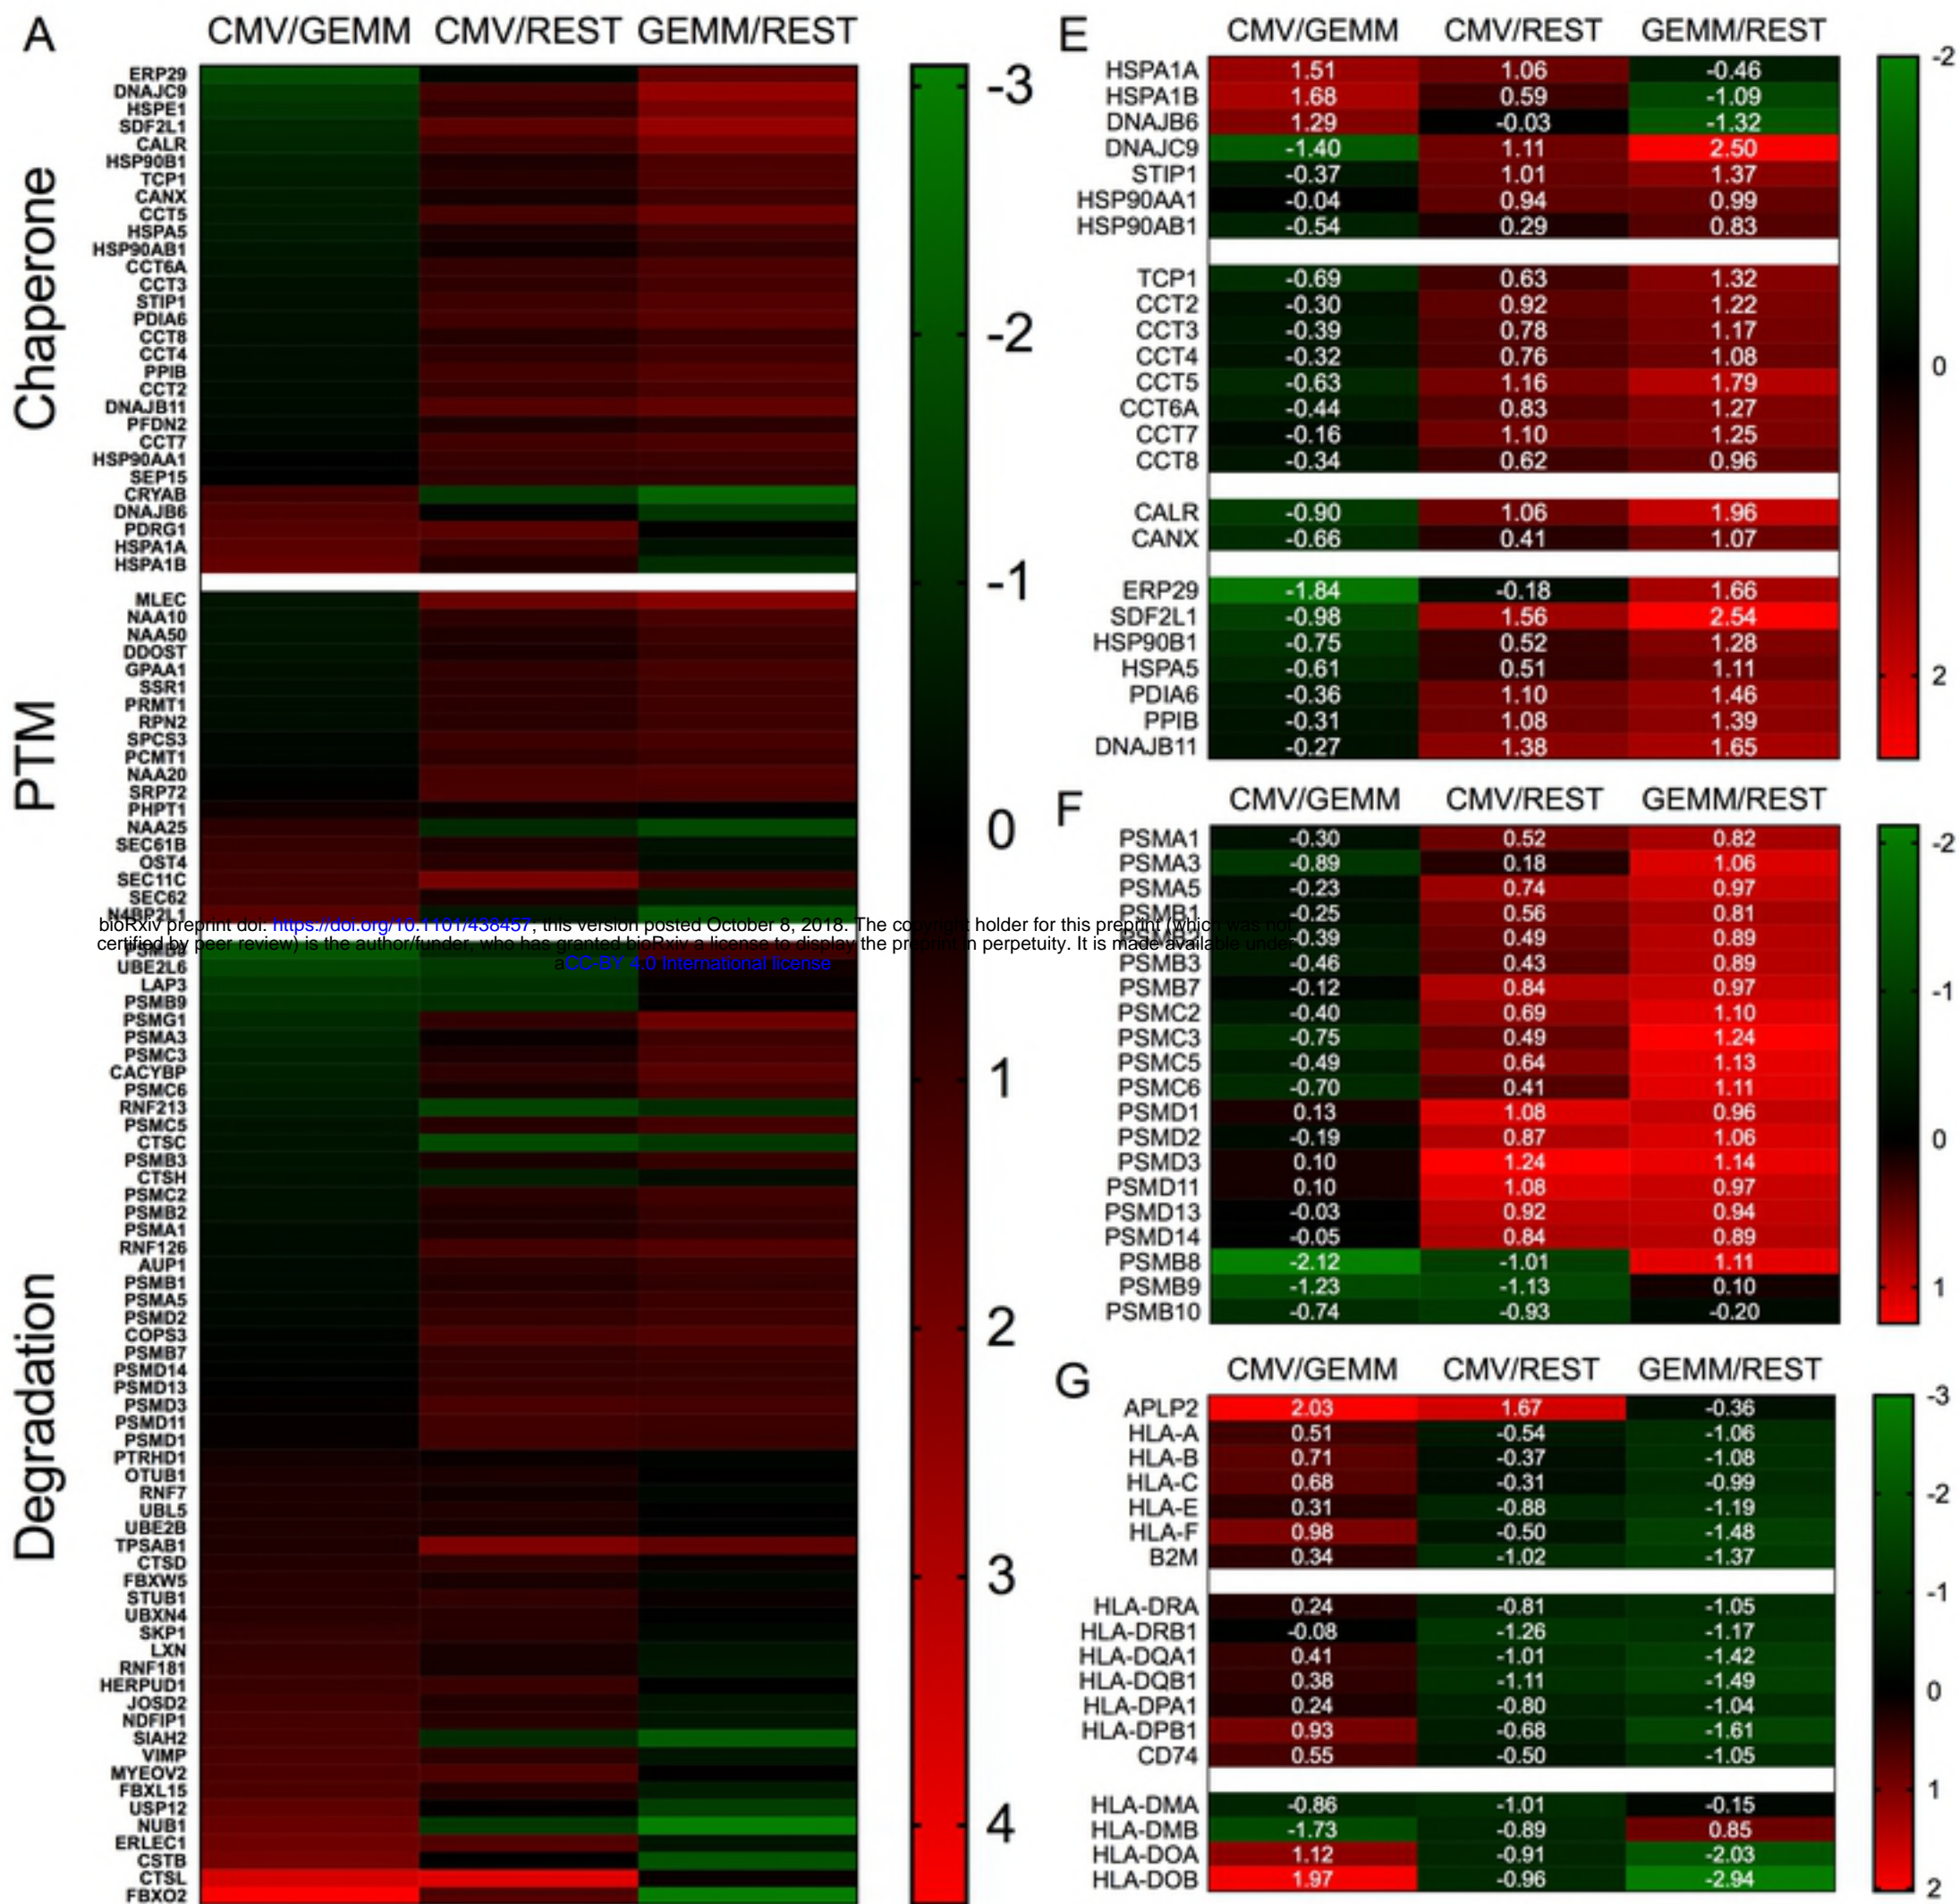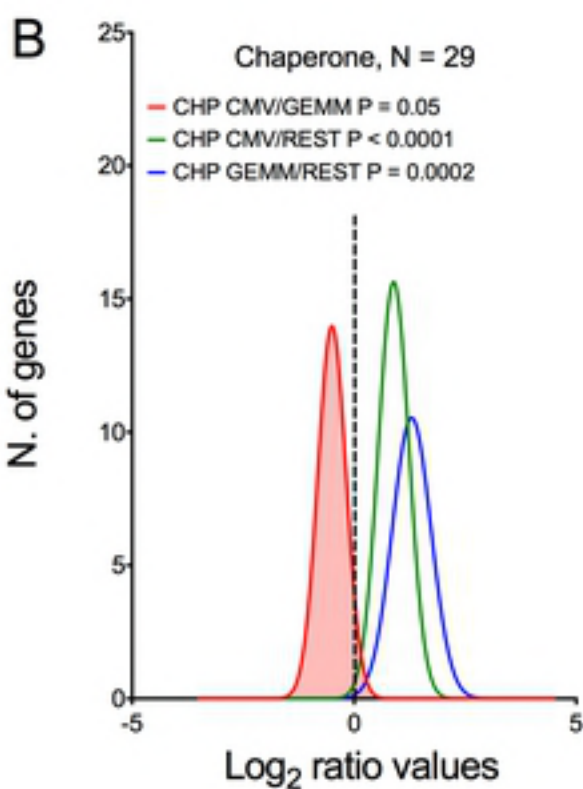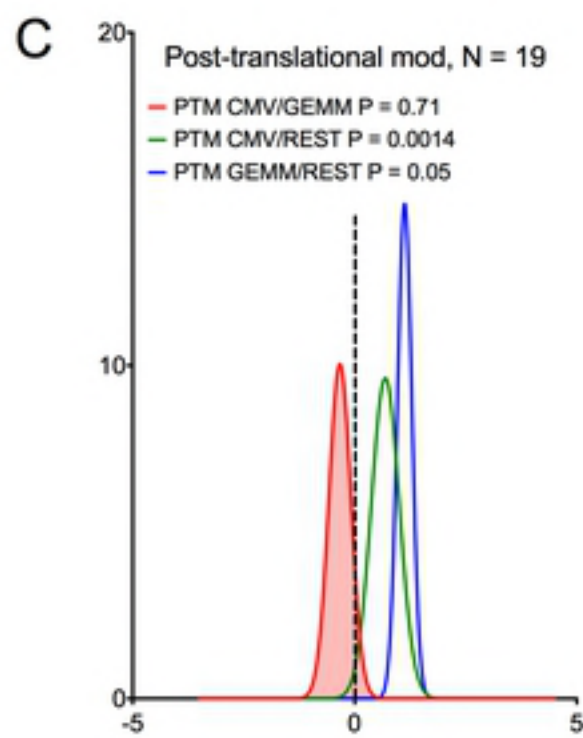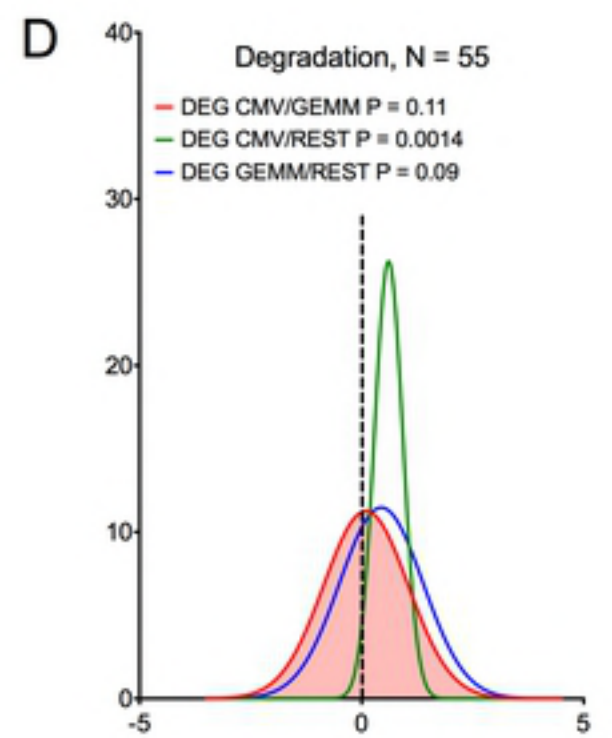

Figure 9

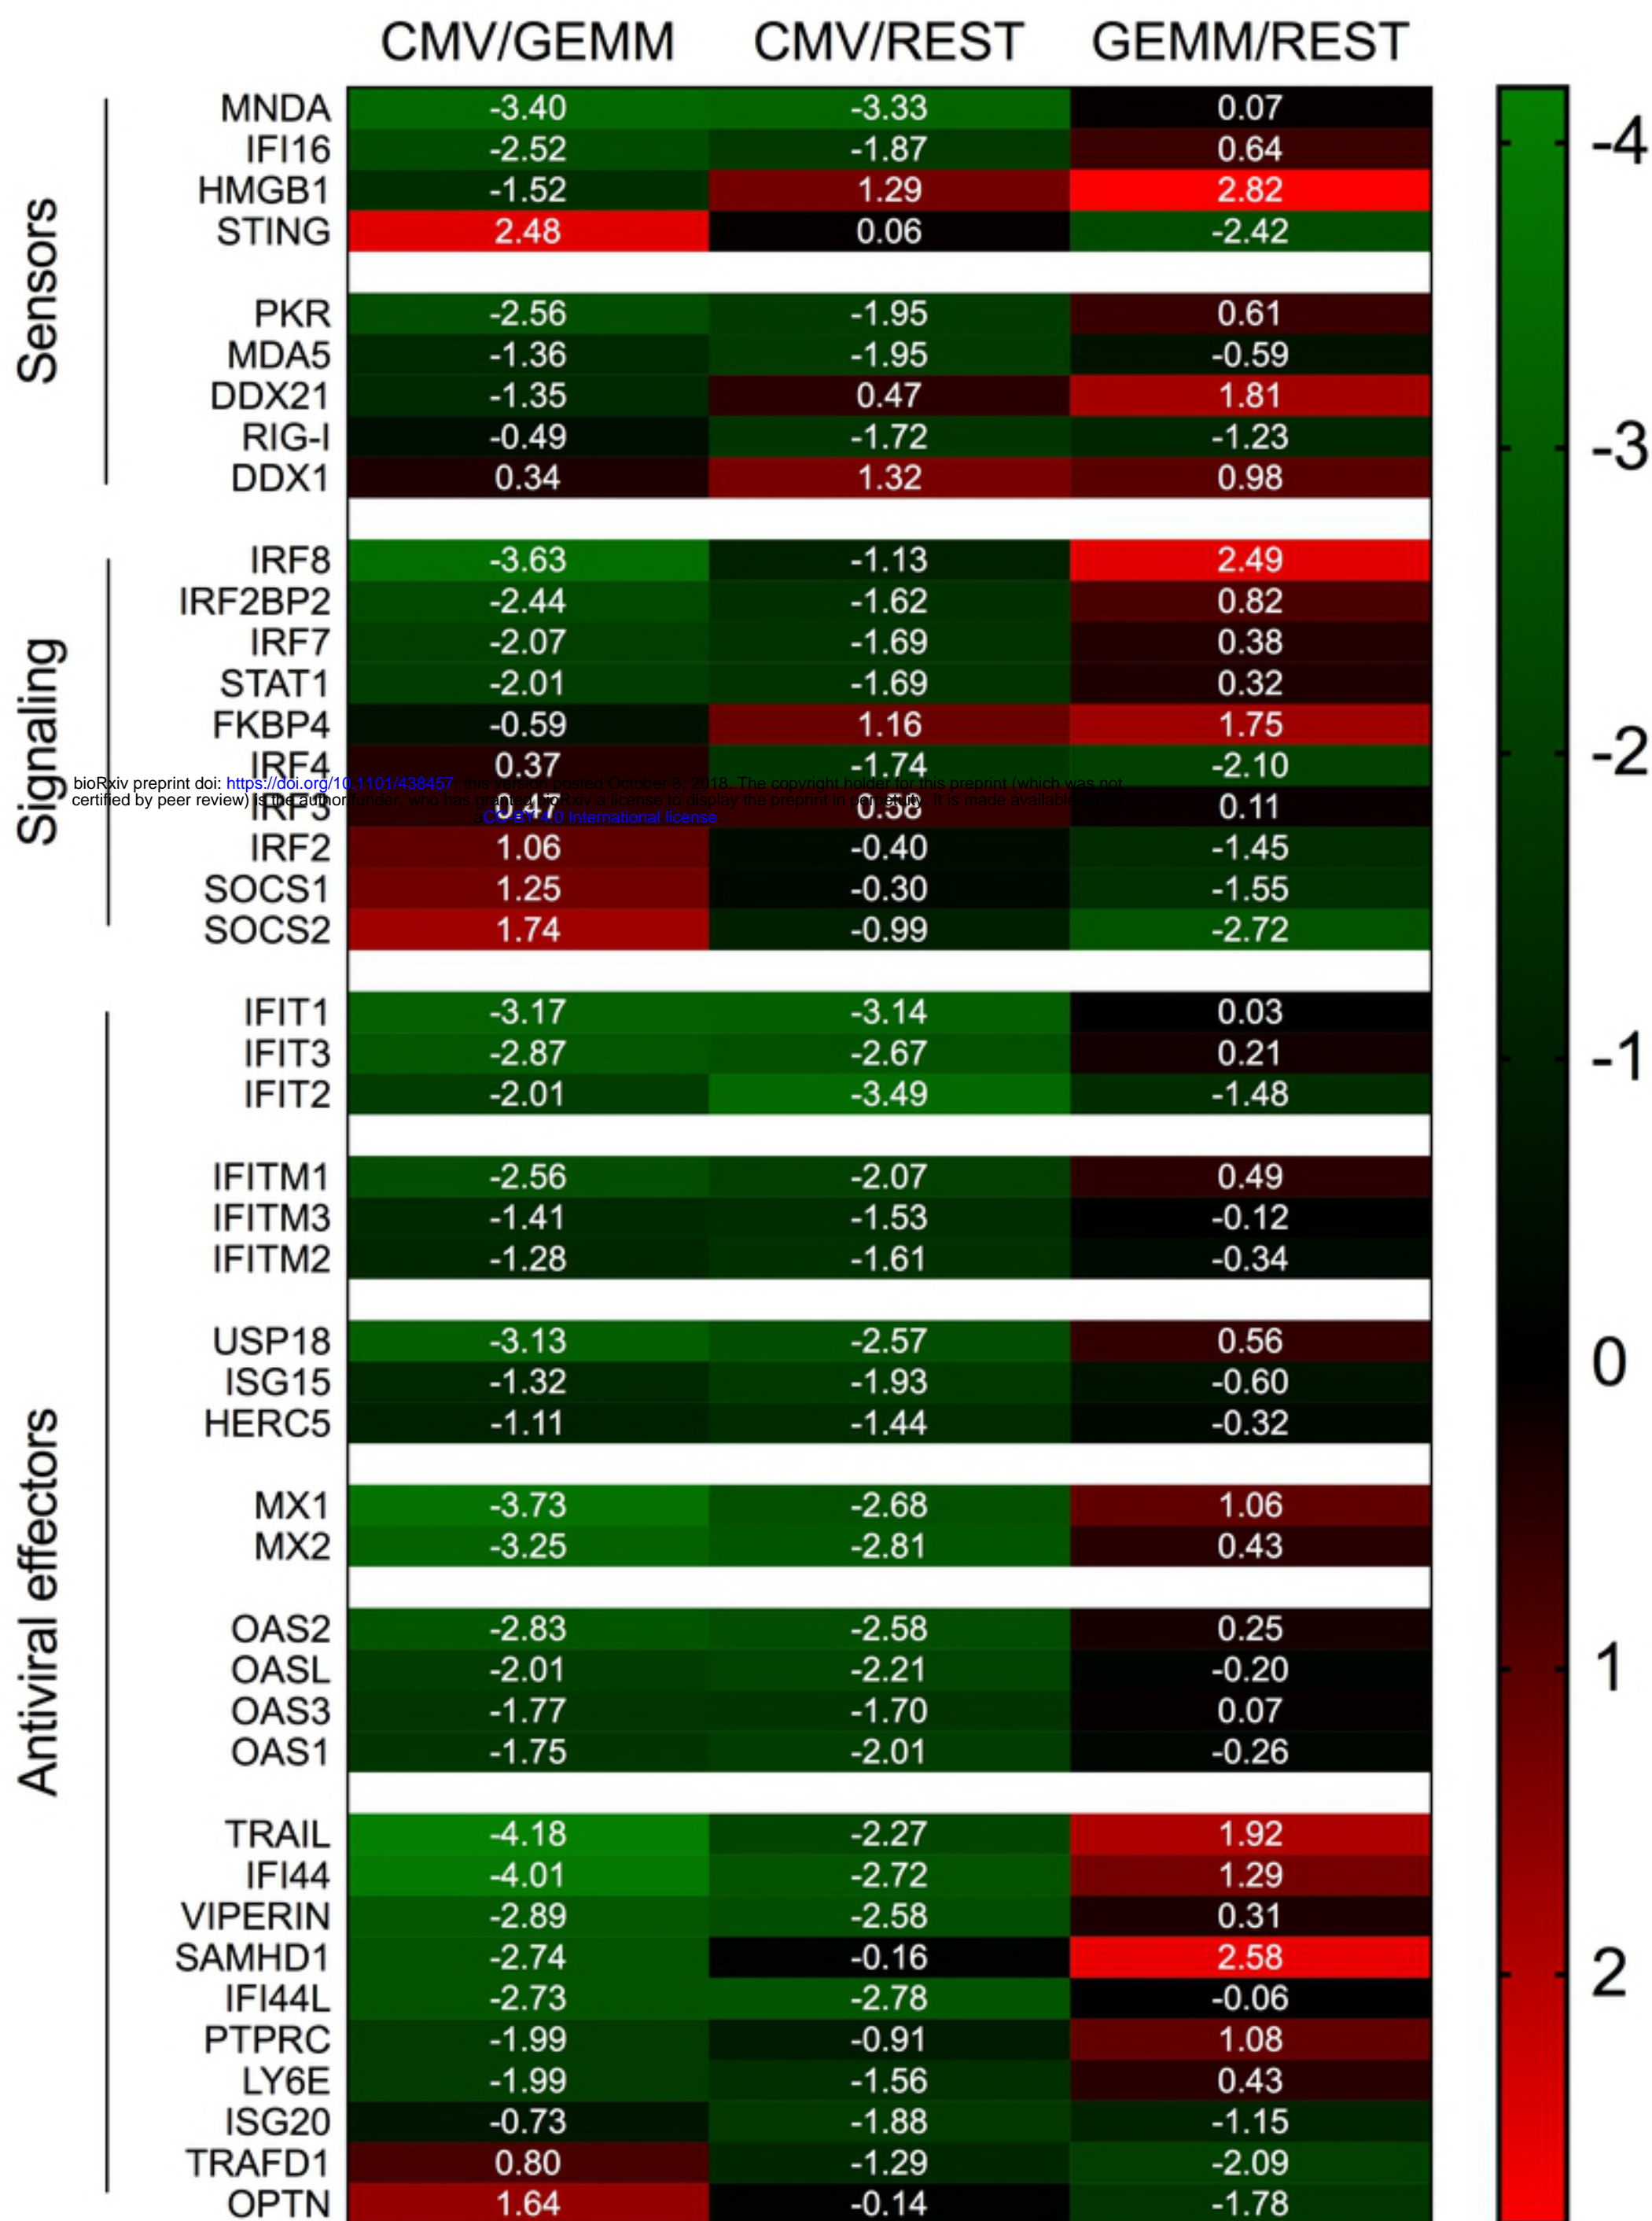

Figure 10
